# Supplementary material
Source: PubMed Central journal article supplement (PMC4974817)
Supplement: NIHMS804093-supplement-Supplemental.pdf [file NIHMS804093-supplement-Supplemental.pdf]

## Supplementary Online Content

Sherva R, Wang Q, Kranzler H, et al. Genome-wide association study of cannabis dependence severity, novel risk variants, and shared genetic risks. *JAMA Psychiatry*. Published online March 30, 2016. doi:10.1001/jamapsychiatry.2016.0036.

**eMethods.** Description of Samples and Analyses

**eFigure 1.** Distribution of *DSM-IV* Cannabis Dependence Criteria Counts

**eFigure 2.** Manhattan and Quintile-Quintile Plots for *DSM-IV* Cannabis Dependence Criteria Count in the Yale-Penn and SAGE African American Cohorts Meta-analysis

**eFigure 3.** Manhattan and Quintile-Quintile Plots for *DSM-IV* Cannabis Dependence Criteria Count in the Yale-Penn and SAGE European American Cohorts Meta-analysis

**eFigure 4.** Quintile-Quintile Plot Showing the Observed vs Expected Distribution of *P* Values for MDD for SNPs Associated With Cannabis Dependence

**eFigure 5.** Quintile-Quintile Plot Showing the Observed vs Expected Distribution of *P* Values for Other Psychiatric Disorders for SNPs Associated With Cannabis Dependence

**eTable 1.** SNPs Associated With *DSM-IV* Cannabis Dependence With  $P < 1.0 \times 10^{-5}$  in the African American, European American, or Combined Meta-analysis by Analysis Group and Including Secondary Analysis Results

**eTable 2.** Pleiotropy Tests Between Cannabis Dependence and 5 Psychiatric Disorders in African American and European American Participants

This supplementary material has been provided by the authors to give readers additional information about their work.

## **eMethods. Description of Samples and Analyses**

### **Description of Yale-Penn sample**

Families were ascertained from treatment centers and advertisements that recruited affected sibling pairs (ASPs) meeting Diagnostic and Statistical Manual of Mental Disorders, 4th Edition (DSM-IV) criteria for CD or OD. Probands were excluded from further study if they had ever received a clinical diagnosis of a major psychotic illness (for example, schizophrenia or schizoaffective disorder). Other family members of the ASPs were recruited when available, regardless of affection status. The case–control subjects were recruited from substance abuse treatment centers and through advertisements at the University of Connecticut Health Center, Yale University School of Medicine, the Medical University of South Carolina, the University of Pennsylvania, and McLean Hospital.

### **Additional quality control information for the Yale-Penn sample**

Genetic relationships were examined by calculating pairwise identity by descent (IBD) proportion estimates using PLINK<sup>1</sup>. Pairs of individuals whose IBD proportions did not match their reported genetic relationship were assigned to two different families and pairs of individuals who shared more than 25% of their alleles IBD were assigned to the same family. Self-reported males with X chromosome heterozygosity > 20% and self-reported females with heterozygosity < 20% were excluded unless their true identity could be determined. These analyses also identified instances where two identical DNA marker profiles were linked to two different interview forms. When demographic information (sex, date of birth, number of reported children) was consistent across interviews, one sample was randomly removed from analysis. Both samples were removed if the demographic information was inconsistent across interviews. In total, 104 DNA samples were removed from analysis due to an inability to definitively assign them to the correct phenotype data.

### **Description of SAGE sample**

The COGA sample<sup>2</sup> is a set of unrelated individuals recruited in Indiana, New York, St. Louis, Connecticut, Iowa, and San Diego selected for genotyping from a larger set of 8,000 subjects. Cases met criteria for DSM-IV alcohol dependence. FSCD<sup>2</sup> contained cases and controls from the greater St. Louis metropolitan area. All cases met criteria for DSM-IV alcohol dependence and most also met criteria for DSM-IV cocaine dependence. Controls were from the same

communities and had consumed alcohol, but had no lifetime history of dependence on any substance. A subgroup of FSCD subjects was not alcohol dependent, but had a lifetime diagnosis of DSM-IV CAD or dependence on another illicit drug. COGEND<sup>3</sup> subjects were recruited in MO and MI. Cases met criteria for DSM-IV alcohol and/or nicotine dependence. Control subjects were selected from the non-dependent population and did not meet criteria for alcohol, nicotine, or illicit drug dependence.

### **Description of the ICGHD Sample**

All International Consortium on the Genetics of Heroin Dependence subjects with informative DSM-IV CAD criteria counts came from The Comorbidity and Trauma Study,<sup>4</sup> a retrospective case-control study examining genetic and environmental factors contributing to heroin dependence liability. Case participants were recruited from maintenance clinics in the greater Sydney area. Control participants were recruited from employment and community centers, open street malls, and local press servicing the same geographical area as the opioid maintenance treatment clinics and either denied recreational use of opioids or had used these drugs recreationally fewer than 11 times lifetime. The prevalence in these individuals of non-opioid illicit drug dependence and illicit drug dependence as well as childhood trauma exposure and other psychiatric disorders is elevated considerably versus estimates of similar measures in Australian general population samples. Participants provided blood samples as a source of DNA and completed a comprehensive psychiatric diagnostic interview based on the Semi-Structured Assessment of the Genetics of Alcoholism - Australia (SSAGA-OZ) augmented with sections drawn from other instruments assessing childhood trauma exposure, family history, and screening for borderline personality disorder.

### **Genotyping and Quality Control**

The entire Yale-Penn sample was genotyped using one of two genotyping arrays: (1) the Illumina HumanOmni1-Quad v1.0 microarray containing 988,306 autosomal SNPs (Yale-Penn.1: performed at the Center for Inherited Disease Research (CIDR) and the Yale Center for Genome Analysis), (2) the Illumina Infinium Human Core Exome microarray (Yale-Penn.2 and Yale-Penn.3: performed at the Yale Center for Genome Analysis), which contains 265,919 exome-focused SNPs and approximately 240,000 tagging SNPs which allow genome-wide imputation. The SAGE samples were genotyped using the Illumina Human 1M array containing 1,069,796 total SNPs and the ICGHD samples were genotyped using the Illumina

Human610\_Quadv1\_B. All QC and subsequent analyses were performed separately within individuals genotyped on the platforms listed above. Samples and SNPs with genotype call rates < 98% were removed. Additional samples were removed due to excess heterozygosity taken to indicate possible contamination, and identification as possible population outliers based on the calculation of principal components. Genotypes were called using GenomeStudio software V2011.1 and genotyping module V1.8.4 (Illumina, San Diego, CA, USA). SNPs with significantly different allele frequencies (within population) across genotyping centers were set to missing prior to imputation. After data cleaning and quality control, (Yale-Penn.1: 711,711; Yale-Penn.2: 261,746; Yale-Penn.3: 327,405, SAGE: 726,191, ICGHD: 551,134) SNPs and (Yale-Penn.1: 5,697; Yale-Penn.2: 2,591; Yale-Penn.3: 683, SAGE: 3,890, ICGHD: 1,893) samples remained for imputation.

To verify and correct potential misclassification of self-reported race, we compared the GWAS data from all subjects with genotypes from the 1000 Genomes reference panel (1000 Genomes Project, 2012; <http://www.1000genomes.org/>), which contains phased haplotypes for 1,094 individuals of various ancestries: 379 of European descent (CEU, FIN, GBR, IBS, and TCI), 286 of Asian descent (CHB, JPT, and CHS), 181 admixed American samples (PUR, CLM, and MXL), and 246 samples of African descent (ASW, LWK, YR). Principal components (PC) analysis was conducted in the entire GWAS sample using Eigensoft<sup>5,6</sup> and SNPs that were common to the each of the five individual genotyping arrays and the 1000 Genomes panel (after pruning the GWAS SNPs for linkage disequilibrium (LD),  $r^2 > 80\%$ ) to characterize the underlying genetic architecture of the samples. Individuals were clustered according to the 1000 Genomes cohort whose centroid was nearest across the first 10 PCs. Those samples that didn't cluster with either AAs or EAs were removed from downstream analysis. We then conducted PC analyses within the two remaining groups and removed any outliers beyond three standard deviations from the mean. The first three PCs were used in all subsequent analyses to correct for residual population stratification.

## **Genotype Imputation**

SNP genotype imputation was performed in the Yale-Penn, SAGE, and ICGHD GWAS cohorts with IMPUTE2<sup>7</sup> using genotyped SNPs and the March 2012 1000 Genomes reference panel (1000 Genomes Project, 2012; <http://www.1000genomes.org/>), which contains phased haplotypes for 1,094 individuals of various ancestries: 379 of European descent (CEU, FIN, GBR, IBS, and TCI), 286 of Asian descent (CHB, JPT, and CHS), 181 admixed American samples (PUR, CLM, and MXL), and 246 samples of African descent (ASW, LWK, YR). EA and AA samples were imputed separately within each cohort.

## **Power**

Power varied according to cohort and population. The largest (N=4,750) and best powered subsample was Yale-Penn AAs genotyped on the Illumina HumanOmni-Quad v1.0, in which we had 80% power to detect SNPs explaining 0.9% of the total variation in CAD symptom count at  $p \leq 5 \times 10^{-8}$ . SAGE AAs (N=1,250) had the lowest power, able to detect GWS SNPs explaining 3.2% of the total trait variance.

## **eReferences**

1. Purcell S, Neale B, Todd-Brown K, et al. PLINK: a tool set for whole-genome association and population-based linkage analyses. *Am J Hum Genet.* 2007;81(3):559-575. doi: 10.1086/519795.
2. Bierut LJ, Strickland JR, Thompson JR, Afful SE, Cottler LB. Drug use and dependence in cocaine dependent subjects, community-based individuals, and their siblings. *Drug Alcohol Depend.* 2008;95(1-2):14-22.
3. Bierut LJ, Madden PA, Breslau N, et al. Novel genes identified in a high-density genome wide association study for nicotine dependence. *Hum Mol Genet.* 2007 Jan 1;16(1):24-35. Epub 2006 Dec 7.
4. Maloney E, Degenhardt L, Darke S, Mattick RP, Nelson E. Suicidal behaviour and associated risk factors among opioid-dependent individuals: a case-control study. *Addiction.* 2007 Dec;102(12):1933-41. Epub 2007 Sep 3.
5. Price AL, Patterson NJ, Plenge RM, Weinblatt ME, Shadick NA, Reich D. Principal components analysis corrects for stratification in genome-wide association studies. *Nat Genet.* 2006;38(8):904-909. doi: 10.1038/ng1847.

6. Patterson N, Price AL, Reich D. Population structure and eigenanalysis. *PLoS Genet.* 2006;2(12):e190. doi: 06-PLGE-RA-0101R3 [pii].
7. Howie BN, Donnelly P, Marchini J. A flexible and accurate genotype imputation method for the next generation of genome-wide association studies. *PLoS Genet.* 2009;5(6):e1000529. doi: 10.1371/journal.pgen.1000529.

**eFigure 1.** Distribution of DSM-IV cannabis dependence criteria counts

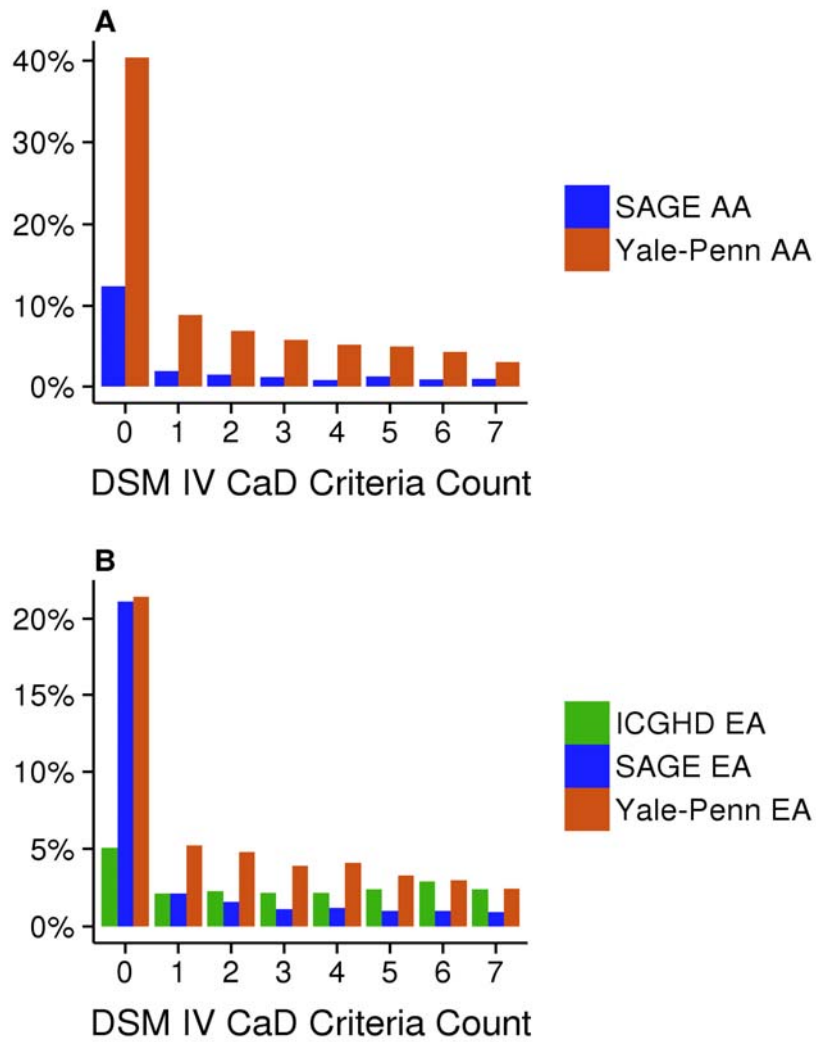

Distribution of DSM-IV cannabis dependence criteria counts in AAs (Panel A) and EAs (Panel B).

**eFigure 2.** Manhattan and quantile-quantile plots for DSM-IV cannabis dependence criteria count in the Yale-Penn.1-2+SAGE AA meta-analysis

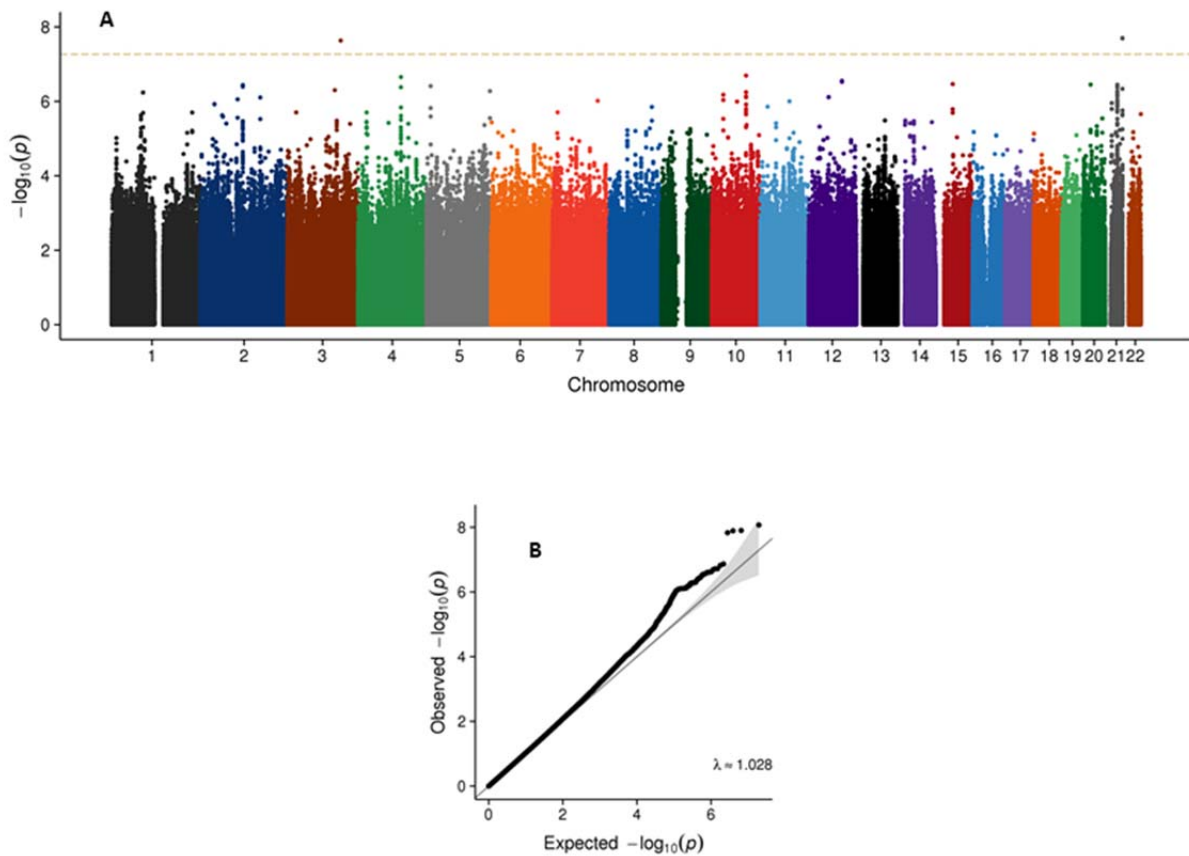

Manhattan and quantile-quantile plots for SNP minor allele dosage linearly regressed on DSM-IV cannabis dependence criteria count in the Yale-Penn+SAGE AA meta-analysis. The gold horizontal line corresponds to the  $-\log_{10}$  of  $5 \times 10^{-8}$ , the threshold for genome-wide significance. The quantile-quantile plot shows the distribution of observed p-values compared to the expected distribution based on a uniform (0,1) distribution.  $\lambda$  is the ratio of the observed to the expected p-value at the median SNP.



**eFigure 3.** Manhattan and quantile-quantile plots for DSM-IV cannabis dependence criteria count in the Yale-Penn.1-2+SAGE EA meta-analysis

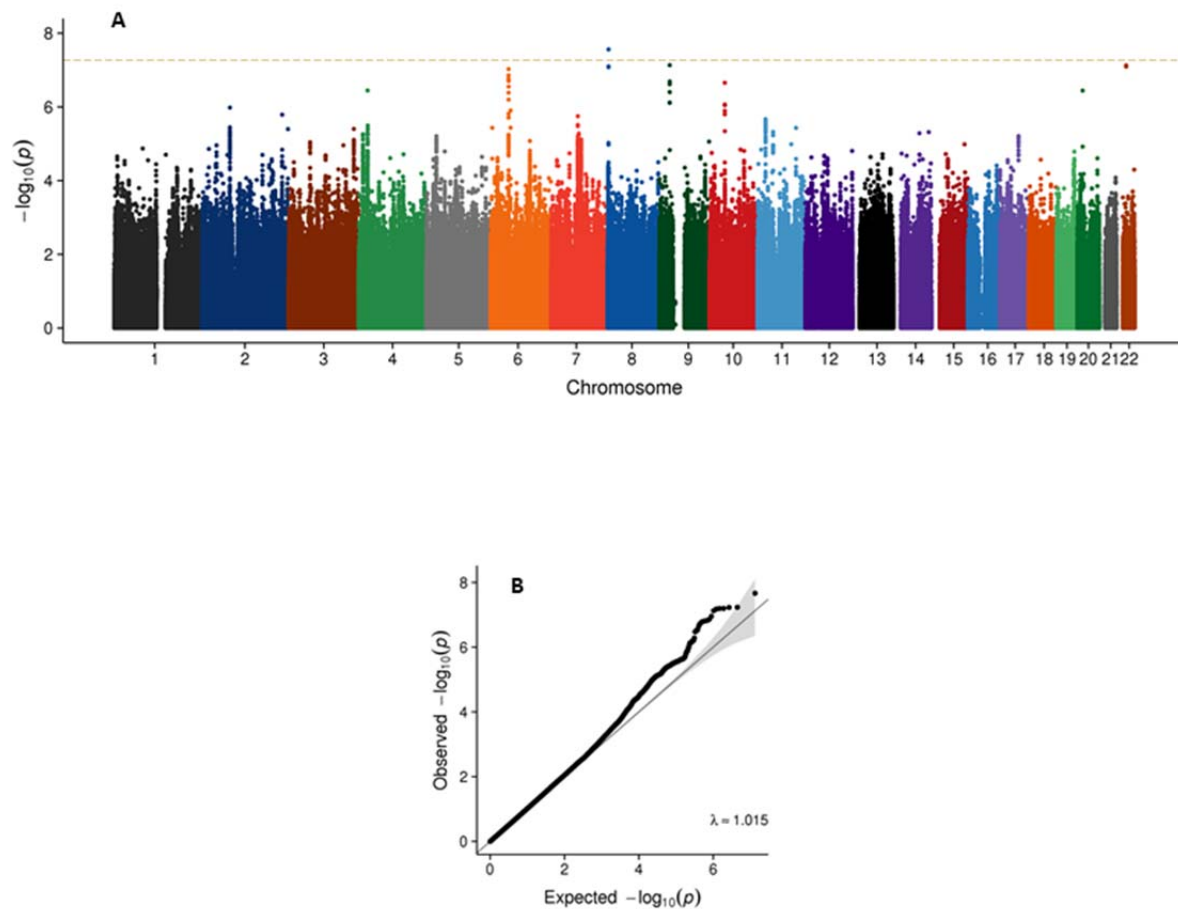

Manhattan and quantile-quantile plots for SNP minor allele dosage linearly regressed on DSM-IV cannabis dependence criteria count in the Yale-Penn+SAGE EA meta-analysis. The gold horizontal line corresponds to the  $-\log_{10}$  of  $5 \times 10^{-8}$ , the threshold for genome-wide significance. The quantile-quantile plot shows the distribution of observed p-values compared to the expected distribution based on a uniform (0,1) distribution.  $\lambda$  is the ratio of the observed to the expected p-value at the median SNP.

**eFigure 4.** Quantile-quantile plot showing the observed vs. expected distribution of p-values for major depressive disorder for SNPs associated with cannabis dependence

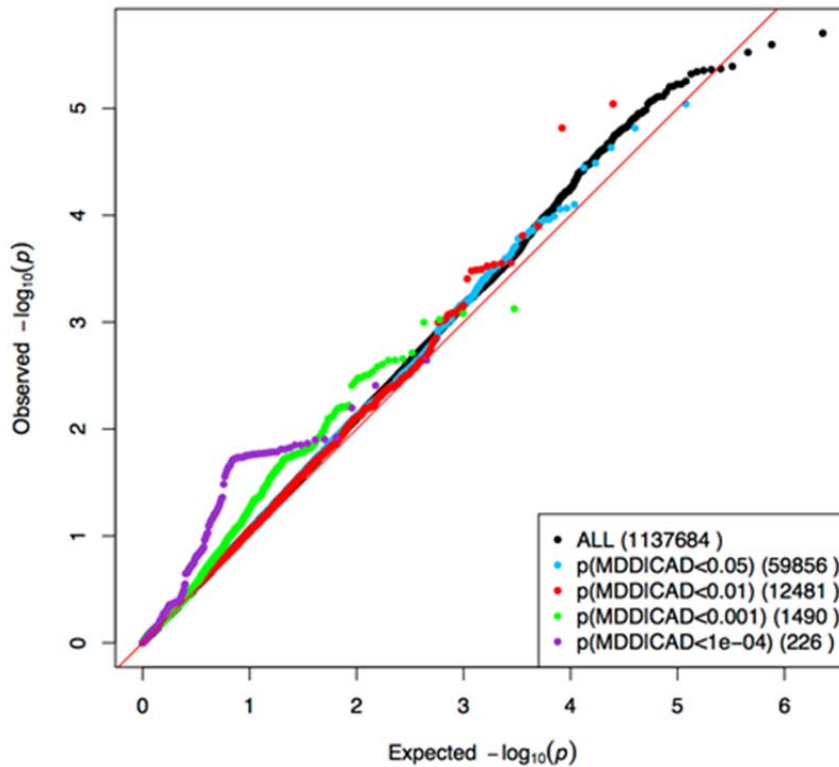

Quantile-quantile plot showing the observed distribution of p-values for major depressive disorder from the Psychiatric Genomics Consortium sample for subsets of SNPs associated with cannabis dependence in the meta-analysis of Yale-Penn and SAGE (black dots represent all SNPs with a valid association result for both cannabis dependence and major depressive disorder, blue dots represent SNPs associated with cannabis dependence at  $P < .05$ , red dots at  $P < .01$ , green dots at  $P < .001$ , and purple dots at  $P < .0001$ ) compared to the expected distribution based on a uniform (0,1) (red line). The number of SNPs observed at each threshold is shown in parentheses in the inset.

**Figure 5.** Quantile-quantile plot showing the observed vs. expected distribution of p-values for other psychiatric disorders for SNPs associated with cannabis dependence

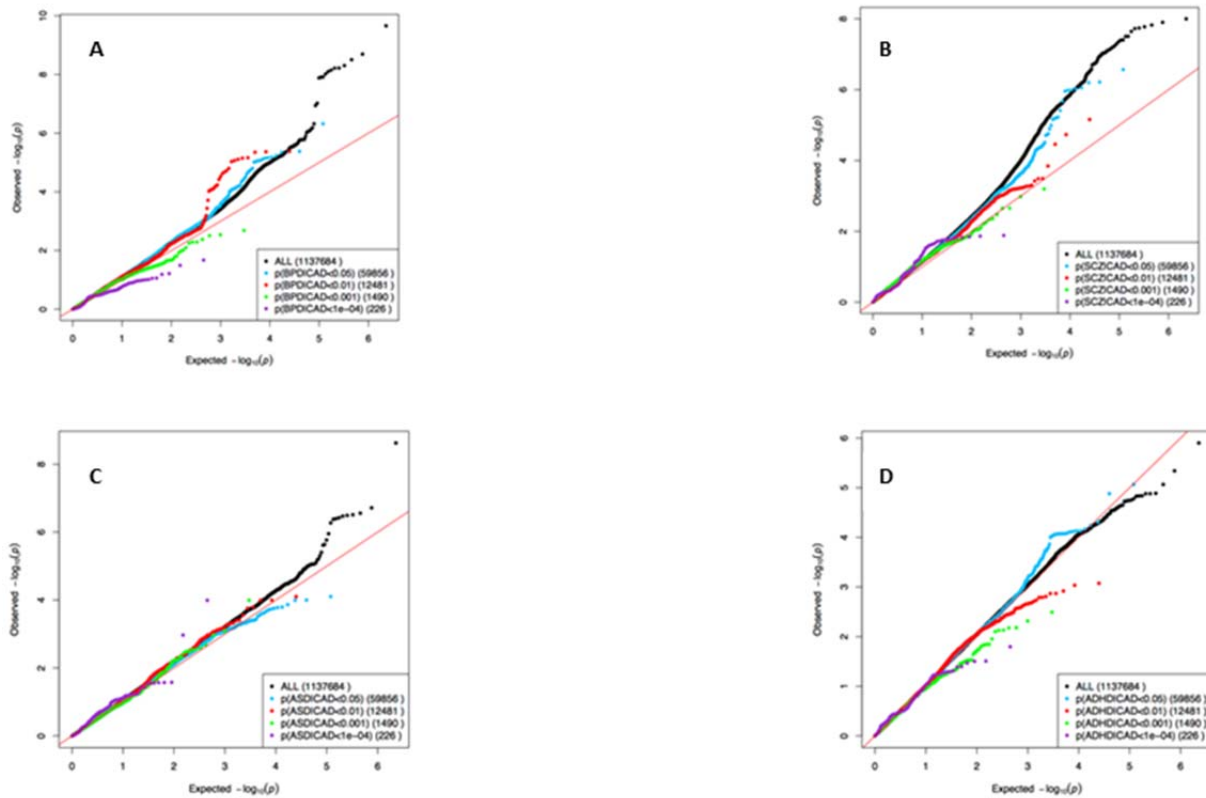

Quantile-Quantile plots showing no enrichment for association with bipolar affective disorder (panel A), schizophrenia (panel B), autism spectrum disorder (panel C), and attention deficit hyperactivity disorder (panel D) among SNPs associated with cannabis dependence at various p-value thresholds (black dots represent all SNPs with a valid association result for both cannabis dependence and the other trait, blue dots represent SNPs associated with cannabis dependence at  $P < .05$ , red dots at  $P < .01$ , green dots at  $P < .001$ , and purple dots at  $P < .0001$ ) compared to the expected distribution based on a uniform (0,1) (red line). The number of SNPs observed at each p-value threshold is shown in parentheses in the inset. The  $P$  values for the other psychiatric disorders are from the Psychiatric Genomics Consortium.

**eTable 1.** SNPs associated with DSM-IV cannabis dependence with  $p < 1.0 \times 10^{-5}$  in the AA, EA or combined meta-analysis by analysis group and including secondary analysis results.

<sup>a</sup>base pair position in human genome assembly build 37

<sup>b</sup>effect allele

<sup>c</sup>reference allele

<sup>d</sup>effect direction of A1. The order of the symbols is: Yale-Penn OMNI AA, SAGE AA, Yale-Penn HCE AA, Yale-Penn OMNI EA, SAGE EA, Yale-Penn HCE EA.

<sup>e</sup>All P = p-value from the primary analysis model with cannabis unexposed individuals included

<sup>f</sup>Exp P = p-value from model with only cannabis exposed individuals

<sup>g</sup>Adj P = p-value from primary analysis model adjusted for the DSM-IV criteria counts for alcohol, cocaine, and opioid dependence.

P-values < 0.05 are in bold italics.

| SNP              | Gene                         | Yale-Penn       |                 |                 |                 | SAGE            |                 |                 |                 | Yale-Penn HCE   |                 |                 |
|------------------|------------------------------|-----------------|-----------------|-----------------|-----------------|-----------------|-----------------|-----------------|-----------------|-----------------|-----------------|-----------------|
|                  |                              | AA              |                 | EA              |                 | AA              |                 | EA              |                 | AA              |                 | EA              |
|                  |                              | Exp P           | Adj P           | Exp P           | Adj P           | Exp P           | Adj P           | Exp P           | Adj P           | Exp P           | Adj P           | Exp P           |
| rs10782635       | RP11-415A20.1-ST6GALNAC5     | <b>9.46E-05</b> | <b>7.16E-05</b> | 2.86E-01        | 4.36E-01        | 3.62E-01        | 6.60E-02        | 2.06E-01        | 7.89E-01        | <b>9.75E-03</b> | <b>4.46E-02</b> | 1.00E+00        |
| rs10873920       | RP11-415A20.1-ST6GALNAC5     | <b>9.44E-05</b> | <b>7.14E-05</b> | 2.85E-01        | 4.36E-01        | 3.62E-01        | 6.60E-02        | 2.05E-01        | 7.89E-01        | <b>9.75E-03</b> | <b>4.46E-02</b> | 1.00E+00        |
| chr1:212183114:l | INTS7                        | <b>3.13E-02</b> | 7.10E-02        | NA              | NA              | <b>2.05E-07</b> | <b>2.11E-03</b> | NA              | NA              | 8.08E-01        | 9.03E-01        | 1.04E-01        |
| rs141482228      | INTS7                        | <b>3.22E-02</b> | 5.89E-02        | NA              | NA              | <b>8.84E-10</b> | <b>1.05E-05</b> | NA              | NA              | 5.73E-01        | 6.74E-01        | 1.16E-01        |
| rs77349458       | SNORA26,INTS7                | <b>1.59E-02</b> | <b>4.70E-02</b> | NA              | NA              | <b>1.57E-07</b> | <b>3.07E-03</b> | NA              | NA              | 9.86E-01        | 8.02E-01        | 1.39E-01        |
| rs78450308       | INTS7,DTL                    | <b>1.42E-02</b> | <b>1.96E-02</b> | NA              | NA              | <b>2.16E-05</b> | <b>9.29E-03</b> | NA              | NA              | 3.56E-01        | 2.16E-01        | <b>3.66E-02</b> |
| rs147434712      | RN7SKP27,AC096570.1-RN7SKP27 | <b>3.79E-05</b> | <b>9.89E-05</b> | NA              | NA              | 1.96E-01        | 2.59E-01        | NA              | NA              | 7.74E-02        | 5.62E-02        | NA              |
| rs114383460      | RN7SL96P,ARHGEF33            | <b>1.01E-04</b> | <b>4.47E-04</b> | NA              | NA              | <b>4.44E-03</b> | <b>4.86E-02</b> | NA              | NA              | 2.33E-01        | 1.89E-01        | NA              |
| rs115913953      | RN7SL96P,ARHGEF33            | <b>1.01E-04</b> | <b>4.47E-04</b> | NA              | NA              | <b>4.44E-03</b> | <b>4.86E-02</b> | NA              | NA              | 2.33E-01        | 1.89E-01        | NA              |
| rs115427433      | RN7SL96P,ARHGEF33            | <b>1.04E-04</b> | <b>4.56E-04</b> | NA              | NA              | <b>4.48E-03</b> | <b>4.91E-02</b> | NA              | NA              | 2.36E-01        | 1.92E-01        | NA              |
| rs73930448       | MTA3,MTA3,MTA3,MTA3,MTA3     | <b>2.62E-03</b> | <b>3.63E-02</b> | 1.34E-01        | 1.77E-01        | <b>3.02E-05</b> | <b>3.50E-03</b> | 9.90E-01        | 8.43E-01        | 5.66E-01        | 1.48E-01        | 5.73E-01        |
| rs77448142       | RPS20P10,RPS20P10-CYP26B1    | 7.47E-02        | 9.42E-02        | NA              | NA              | <b>2.13E-07</b> | <b>3.27E-04</b> | NA              | NA              | 8.80E-01        | 5.98E-01        | NA              |
| rs192238154      | AC084149.1-AC105399.2        | 6.31E-01        | 3.44E-01        | <b>1.10E-04</b> | <b>1.98E-04</b> | 3.87E-01        | 4.70E-01        | <b>2.15E-03</b> | <b>4.85E-02</b> | 2.79E-01        | 4.51E-01        | 6.37E-01        |
| rs74261103       | AC084149.1-AC105399.2        | 7.44E-01        | 5.26E-01        | <b>2.78E-05</b> | <b>2.44E-05</b> | 6.55E-01        | 7.84E-01        | <b>2.97E-03</b> | 9.29E-02        | 3.04E-01        | 4.40E-01        | 8.42E-01        |
| rs13386612       | AC084149.1-AC105399.2        | 6.48E-01        | 5.01E-01        | <b>3.11E-05</b> | <b>2.64E-05</b> | 3.41E-01        | 4.66E-01        | <b>2.94E-03</b> | 9.27E-02        | 3.56E-01        | 4.85E-01        | 8.84E-01        |
| rs10181488       | AC084149.1-AC105399.2        | 6.45E-01        | 5.01E-01        | <b>2.92E-05</b> | <b>2.46E-05</b> | 3.33E-01        | 4.58E-01        | <b>2.94E-03</b> | 9.27E-02        | 3.61E-01        | 4.89E-01        | 8.80E-01        |
| rs1487036        | AC084149.1-AC105399.2        | 8.73E-01        | 4.87E-01        | <b>4.70E-05</b> | <b>3.48E-05</b> | 5.80E-01        | 5.82E-01        | <b>3.01E-03</b> | 1.14E-01        | 2.93E-01        | 3.91E-01        | 7.72E-01        |
| rs2129493        | AC084149.1-AC105399.2        | 8.07E-01        | 7.47E-01        | <b>5.69E-05</b> | <b>4.34E-05</b> | 3.92E-01        | 5.55E-01        | <b>2.57E-03</b> | 1.13E-01        | 2.97E-01        | 4.16E-01        | 7.33E-01        |
| rs1872786        | AC084149.1-AC105399.2        | 8.03E-01        | 7.45E-01        | <b>1.15E-04</b> | <b>9.66E-05</b> | 4.05E-01        | 6.00E-01        | <b>2.29E-03</b> | 1.23E-01        | 2.76E-01        | 3.67E-01        | 7.42E-01        |
| rs1872787        | AC084149.1-AC105399.2        | 7.57E-01        | 8.01E-01        | <b>1.16E-04</b> | <b>8.91E-05</b> | 4.02E-01        | 6.36E-01        | <b>1.88E-03</b> | 1.03E-01        | 2.81E-01        | 3.78E-01        | 7.67E-01        |
| rs12617011       | AC084149.1-AC105399.2        | 7.92E-01        | 7.47E-01        | <b>1.10E-04</b> | <b>9.10E-05</b> | 4.00E-01        | 6.14E-01        | <b>2.32E-03</b> | 1.32E-01        | 2.75E-01        | 3.64E-01        | 7.85E-01        |
| rs12621150       | AC105399.2-AC073628.1        | 3.59E-01        | 2.82E-01        | <b>6.57E-05</b> | <b>8.07E-05</b> | 8.03E-01        | 9.76E-01        | <b>2.32E-04</b> | <b>4.23E-02</b> | 3.46E-01        | 2.98E-01        | 7.64E-01        |
| rs2901857        | AC105399.2-AC073628.1        | 9.34E-01        | 5.43E-01        | <b>1.89E-04</b> | <b>2.45E-04</b> | 7.54E-01        | 5.75E-01        | <b>3.32E-04</b> | <b>4.75E-02</b> | 4.12E-01        | 4.79E-01        | 6.84E-01        |
| rs1979560        | AC105399.2-AC073628.1        | 9.37E-01        | 5.43E-01        | <b>1.87E-04</b> | <b>2.42E-04</b> | 7.61E-01        | 5.78E-01        | <b>3.12E-04</b> | <b>4.64E-02</b> | 4.07E-01        | 4.76E-01        | 6.78E-01        |
| rs144605126      | AC073987.1                   | <b>3.30E-02</b> | <b>3.13E-02</b> | NA              | NA              | <b>1.13E-03</b> | <b>1.15E-04</b> | NA              | NA              | <b>1.70E-04</b> | <b>7.56E-03</b> | NA              |
| rs115750691      | AC073987.1                   | 5.42E-02        | 5.08E-02        | NA              | NA              | <b>2.32E-03</b> | <b>2.12E-04</b> | NA              | NA              | <b>3.05E-04</b> | <b>1.64E-02</b> | NA              |
| rs75966817       | AC092170.1-AC009312.1        | <b>2.13E-03</b> | <b>1.56E-02</b> | NA              | NA              | <b>6.30E-03</b> | 7.14E-02        | NA              | NA              | <b>7.02E-03</b> | <b>5.81E-03</b> | NA              |
| rs77627012       | AC092170.1-AC009312.1        | <b>1.05E-03</b> | <b>3.63E-03</b> | NA              | NA              | <b>2.48E-03</b> | <b>3.36E-02</b> | NA              | NA              | <b>1.54E-03</b> | <b>1.03E-03</b> | NA              |
| rs113582837      | AC092170.1-AC009312.1        | <b>9.65E-04</b> | <b>3.20E-03</b> | NA              | NA              | <b>2.15E-03</b> | <b>2.94E-02</b> | NA              | NA              | <b>1.64E-03</b> | <b>1.09E-03</b> | NA              |
| rs115195999      | AC092170.1-AC009312.1        | <b>6.00E-04</b> | <b>2.27E-03</b> | NA              | NA              | <b>2.70E-03</b> | <b>3.41E-02</b> | NA              | NA              | <b>1.57E-03</b> | <b>9.09E-04</b> | NA              |
| rs74950612       | AC092170.1-AC009312.1        | <b>1.58E-02</b> | <b>4.02E-02</b> | NA              | NA              | <b>1.32E-03</b> | <b>1.28E-02</b> | NA              | NA              | <b>7.89E-04</b> | <b>1.33E-03</b> | NA              |
| rs76850313       | AC092170.1-AC009312.1        | <b>6.33E-04</b> | <b>2.02E-03</b> | NA              | NA              | <b>2.84E-03</b> | 5.05E-02        | NA              | NA              | <b>2.54E-03</b> | <b>1.48E-03</b> | NA              |
| rs115645716      | AC092170.1-AC009312.1        | <b>3.28E-04</b> | <b>2.35E-03</b> | NA              | NA              | <b>2.84E-03</b> | <b>1.62E-02</b> | NA              | NA              | <b>1.42E-02</b> | <b>1.01E-02</b> | NA              |
| rs138518560      | AC092170.1-AC009312.1        | <b>2.56E-05</b> | <b>1.82E-04</b> | NA              | NA              | <b>7.81E-03</b> | 5.63E-02        | NA              | NA              | <b>1.81E-02</b> | <b>7.20E-03</b> | NA              |
| rs116479873      | AC092170.1-AC009312.1        | <b>4.22E-04</b> | <b>3.73E-03</b> | NA              | NA              | 2.15E-01        | 5.21E-01        | NA              | NA              | <b>3.71E-04</b> | <b>6.30E-04</b> | NA              |
| rs150064803      | AC092170.1-AC009312.1        | <b>2.21E-04</b> | <b>2.72E-03</b> | NA              | NA              | 2.28E-01        | 5.11E-01        | NA              | NA              | <b>1.22E-03</b> | <b>2.93E-03</b> | NA              |
| rs116622675      | AC092170.1-AC009312.1        | <b>1.14E-03</b> | <b>4.93E-03</b> | NA              | NA              | 7.75E-02        | 2.37E-01        | NA              | NA              | <b>4.82E-03</b> | <b>3.95E-03</b> | NA              |
| rs73947458       | AC009312.1                   | <b>1.26E-04</b> | <b>3.07E-03</b> | NA              | NA              | 1.54E-01        | 2.50E-01        | NA              | NA              | <b>3.42E-02</b> | 9.31E-02        | NA              |
| rs57275972       | snoU13,SCN9A                 | <b>1.63E-05</b> | <b>1.03E-04</b> | NA              | NA              | 8.24E-02        | 5.23E-01        | NA              | NA              | 2.89E-01        | 3.91E-01        | NA              |
| rs143020225      | snoU13,SCN9A                 | <b>5.85E-07</b> | <b>8.62E-06</b> | NA              | NA              | <b>4.13E-02</b> | 3.51E-01        | NA              | NA              | 9.88E-01        | 9.82E-01        | NA              |
| rs112945476      | SCN9A                        | <b>9.81E-06</b> | <b>4.12E-05</b> | NA              | NA              | 6.61E-02        | 4.79E-01        | NA              | NA              | 2.81E-01        | 4.25E-01        | NA              |
| rs111415017      | SCN9A                        | <b>8.29E-06</b> | <b>3.39E-05</b> | NA              | NA              | 7.24E-02        | 5.06E-01        | NA              | NA              | 2.95E-01        | 4.19E-01        | NA              |
| rs113283978      | SCN9A                        | <b>5.66E-06</b> | <b>3.14E-05</b> | NA              | NA              | 8.79E-02        | 5.15E-01        | NA              | NA              | 3.10E-01        | 4.99E-01        | NA              |

|                  |                              |                 |                 |                 |                 |                 |                 |                 |                 |                 |                 |                 |
|------------------|------------------------------|-----------------|-----------------|-----------------|-----------------|-----------------|-----------------|-----------------|-----------------|-----------------|-----------------|-----------------|
| chr2:167235049:D | SCN9A,SCN9A-SCN7A            | <b>7.24E-06</b> | <b>3.14E-05</b> | NA              | NA              | 8.15E-02        | 5.32E-01        | NA              | NA              | 3.03E-01        | 5.19E-01        | NA              |
| rs112047299      | SCN9A,SCN9A-SCN7A            | <b>7.00E-06</b> | <b>3.07E-05</b> | NA              | NA              | 8.22E-02        | 5.32E-01        | NA              | NA              | 3.06E-01        | 5.25E-01        | NA              |
| chr2:167239818:D | SCN9A-SCN7A                  | <b>7.43E-07</b> | <b>5.79E-06</b> | NA              | NA              | 7.84E-02        | 5.23E-01        | NA              | NA              | 7.12E-01        | 9.37E-01        | NA              |
| rs57862846       | SCN9A-SCN7A                  | <b>7.73E-06</b> | <b>3.47E-05</b> | NA              | NA              | 8.02E-02        | 5.21E-01        | NA              | NA              | 3.23E-01        | 4.83E-01        | NA              |
| rs75884187       | SCN9A-SCN7A                  | <b>8.51E-06</b> | <b>3.95E-05</b> | NA              | NA              | 7.89E-02        | 5.14E-01        | NA              | NA              | 3.13E-01        | 5.24E-01        | NA              |
| rs6432911        | SCN9A-SCN7A                  | <b>8.52E-06</b> | <b>4.02E-05</b> | NA              | NA              | 7.81E-02        | 5.09E-01        | NA              | NA              | 3.15E-01        | 5.24E-01        | NA              |
| rs16856071       | SPC25,SPC25,SPC25,SPC25      | 4.51E-01        | 6.70E-01        | <b>5.20E-03</b> | <b>7.26E-03</b> | 5.93E-01        | 5.38E-01        | <b>1.12E-02</b> | <b>4.32E-02</b> | 9.17E-01        | 9.73E-01        | <b>1.16E-02</b> |
| rs77921320       | LINC01090                    | NA              | NA              | <b>1.72E-02</b> | 6.66E-02        | NA              | NA              | <b>8.51E-05</b> | <b>2.77E-03</b> | 5.47E-01        | 4.28E-01        | 6.05E-01        |
| rs74002562       | LINC01107-AC113618.1         | <b>6.32E-04</b> | <b>1.49E-02</b> | NA              | NA              | <b>2.17E-03</b> | <b>3.13E-02</b> | NA              | NA              | 9.97E-02        | 1.62E-01        | NA              |
| rs4684628        | SRGAP3,SRGAP3,SRGAP3,SRGAP3  | 9.83E-02        | 1.24E-01        | 9.16E-02        | 2.00E-01        | <b>3.01E-02</b> | 1.98E-01        | <b>1.71E-02</b> | 8.22E-02        | <b>4.28E-02</b> | 4.30E-01        | 1.30E-01        |
| rs150728868      | EIF3KP2-AC133680.1           | NA              | NA              | NA              | NA              | <b>1.12E-04</b> | <b>1.06E-05</b> | NA              | NA              | <b>1.05E-03</b> | <b>1.46E-03</b> | NA              |
| rs80329973       | LSAMP                        | NA              | NA              | 9.53E-01        | 9.84E-01        | <b>4.35E-02</b> | <b>2.77E-02</b> | 3.20E-01        | 6.76E-02        | <b>7.75E-06</b> | <b>6.19E-05</b> | 6.78E-01        |
| rs811810         | DBR1,DBR1-ARMC8              | <b>2.35E-04</b> | <b>2.45E-04</b> | 1.27E-01        | 1.38E-01        | <b>1.95E-02</b> | <b>3.89E-02</b> | 8.30E-01        | 8.74E-01        | 1.17E-01        | <b>4.37E-02</b> | 2.97E-01        |
| rs774804         | DBR1,DBR1-ARMC8              | <b>2.56E-04</b> | <b>2.32E-04</b> | 7.11E-02        | 7.73E-02        | <b>2.48E-02</b> | <b>4.83E-02</b> | 9.91E-01        | 9.45E-01        | 1.25E-01        | <b>3.93E-02</b> | 5.27E-01        |
| rs774805         | DBR1,DBR1-ARMC8              | <b>2.40E-04</b> | <b>2.47E-04</b> | 1.05E-01        | 1.17E-01        | <b>1.89E-02</b> | <b>3.63E-02</b> | 8.44E-01        | 8.68E-01        | 1.20E-01        | <b>4.49E-02</b> | 3.49E-01        |
| rs2622700        | DBR1,DBR1-ARMC8              | <b>4.14E-04</b> | <b>4.65E-04</b> | 1.26E-01        | 1.37E-01        | <b>1.95E-02</b> | <b>2.90E-02</b> | 8.17E-01        | 8.73E-01        | 1.01E-01        | <b>3.67E-02</b> | 3.00E-01        |
| rs143244591      | RP11-206M11.7                | <b>1.19E-04</b> | <b>9.69E-04</b> | NA              | NA              | <b>1.93E-02</b> | 1.06E-01        | NA              | NA              | <b>1.59E-05</b> | <b>1.92E-04</b> | NA              |
| rs139793347      | .ADL2,NAALADL2,NAALADL2,NAAL | <b>1.15E-06</b> | <b>8.74E-08</b> | NA              | NA              | 2.58E-01        | 5.49E-01        | NA              | NA              | 9.61E-01        | 8.24E-01        | NA              |
| rs4912498        | EIF2B5-IT1,EIF2B5            | 5.73E-01        | 7.79E-01        | <b>6.16E-03</b> | <b>8.62E-03</b> | 6.33E-01        | 4.03E-01        | <b>2.51E-02</b> | <b>4.22E-03</b> | 8.33E-02        | 1.57E-01        | <b>1.49E-03</b> |
| rs10939037       | LGI2-SEPSECS                 | 7.20E-01        | 6.53E-01        | <b>1.90E-04</b> | <b>2.01E-04</b> | 1.41E-01        | 2.52E-01        | <b>2.68E-04</b> | 1.04E-01        | 4.98E-01        | 7.71E-01        | 3.28E-01        |
| rs10939038       | LGI2-SEPSECS                 | 7.66E-01        | 6.88E-01        | <b>3.33E-04</b> | <b>3.86E-04</b> | 1.54E-01        | 2.41E-01        | <b>2.10E-04</b> | 8.29E-02        | 5.40E-01        | 8.08E-01        | 3.54E-01        |
| rs73252531       | SEPSECS,SEPSECS-PI4K2B       | 1.10E-01        | 2.11E-01        | 3.06E-01        | 9.60E-01        | 8.39E-02        | 2.56E-01        | <b>7.55E-06</b> | <b>2.97E-03</b> | 8.60E-01        | 9.28E-01        | 2.75E-01        |
| rs11937742       | SEPSECS,PI4K2B               | 8.66E-01        | 9.13E-01        | <b>4.20E-04</b> | <b>2.78E-03</b> | 3.22E-01        | 4.90E-01        | <b>1.27E-03</b> | 6.32E-02        | 4.08E-01        | 9.70E-01        | 3.84E-01        |
| chr4:25163774:I  | SEPSECS,PI4K2B               | 6.46E-01        | 5.38E-01        | <b>1.93E-03</b> | <b>4.96E-03</b> | 7.26E-01        | 9.62E-01        | <b>2.18E-03</b> | 1.61E-01        | 6.61E-01        | 8.37E-01        | 1.85E-01        |
| chr4:25163777:I  | SEPSECS,PI4K2B               | 6.15E-01        | 4.89E-01        | <b>3.94E-03</b> | <b>8.25E-03</b> | 7.65E-01        | 9.74E-01        | <b>1.43E-03</b> | 1.23E-01        | 6.95E-01        | 8.83E-01        | 1.03E-01        |
| rs73252534       | PI4K2B                       | NA              | NA              | 5.51E-02        | 3.92E-01        | NA              | NA              | <b>1.57E-06</b> | <b>3.55E-04</b> | 7.86E-01        | 6.19E-01        | 1.61E-01        |
| rs12498160       | PI4K2B                       | 8.45E-01        | 8.86E-01        | <b>4.03E-04</b> | <b>2.72E-03</b> | 3.23E-01        | 5.00E-01        | <b>1.23E-03</b> | 6.20E-02        | 3.83E-01        | 9.97E-01        | 3.82E-01        |
| rs73252535       | PI4K2B                       | NA              | NA              | 5.60E-02        | 3.96E-01        | NA              | NA              | <b>1.52E-06</b> | <b>3.41E-04</b> | 7.86E-01        | 6.19E-01        | 1.61E-01        |
| rs73252537       | PI4K2B                       | NA              | NA              | 5.74E-02        | 4.01E-01        | NA              | NA              | <b>1.40E-06</b> | <b>3.15E-04</b> | 7.87E-01        | 6.20E-01        | 1.61E-01        |
| rs73252538       | PI4K2B                       | NA              | NA              | 5.57E-02        | 4.02E-01        | NA              | NA              | <b>1.27E-06</b> | <b>2.90E-04</b> | 7.56E-01        | 5.98E-01        | 1.60E-01        |
| rs73252540       | PI4K2B                       | NA              | NA              | 8.57E-02        | 4.47E-01        | NA              | NA              | <b>1.30E-06</b> | <b>3.23E-04</b> | 7.83E-01        | 9.60E-01        | 2.04E-01        |
| rs147170184      | PI4K2B                       | <b>2.93E-03</b> | 6.66E-02        | 8.92E-02        | 4.47E-01        | 2.18E-01        | 3.79E-01        | <b>3.35E-06</b> | <b>5.60E-04</b> | 3.42E-01        | 1.47E-01        | 2.65E-01        |
| rs147364487      | PI4K2B                       | 5.23E-02        | 3.19E-01        | 8.95E-02        | 4.48E-01        | 3.87E-01        | 5.27E-01        | <b>3.36E-06</b> | <b>5.60E-04</b> | 4.91E-01        | 2.33E-01        | 2.66E-01        |
| rs73252544       | PI4K2B                       | NA              | NA              | 9.38E-02        | 4.82E-01        | NA              | NA              | <b>3.36E-06</b> | <b>5.62E-04</b> | 8.61E-01        | 9.64E-01        | 1.36E-01        |
| rs141771882      | PI4K2B                       | <b>6.18E-03</b> | 1.13E-01        | 7.82E-02        | 4.00E-01        | 2.02E-01        | 3.46E-01        | <b>3.68E-06</b> | <b>4.65E-04</b> | 3.07E-01        | 1.27E-01        | 2.87E-01        |
| rs115472754      | PI4K2B                       | <b>3.39E-03</b> | 7.39E-02        | 8.98E-02        | 4.49E-01        | 2.75E-01        | 4.31E-01        | <b>3.73E-06</b> | <b>6.83E-04</b> | 2.78E-01        | 9.79E-02        | 2.67E-01        |
| rs115579188      | PI4K2B                       | <b>5.22E-03</b> | 8.68E-02        | 9.67E-02        | 4.73E-01        | 2.60E-01        | 3.62E-01        | <b>3.44E-06</b> | <b>5.61E-04</b> | 3.08E-01        | 1.42E-01        | 2.65E-01        |
| rs73252547       | PI4K2B                       | <b>3.35E-03</b> | 7.38E-02        | 9.67E-02        | 4.74E-01        | 2.13E-01        | 3.72E-01        | <b>3.44E-06</b> | <b>5.61E-04</b> | 3.39E-01        | 1.45E-01        | 2.65E-01        |
| rs55974734       | PI4K2B                       | <b>3.39E-03</b> | 7.45E-02        | 9.73E-02        | 4.76E-01        | 2.13E-01        | 3.71E-01        | <b>3.45E-06</b> | <b>5.61E-04</b> | 3.39E-01        | 1.45E-01        | 2.66E-01        |
| rs73252548       | PI4K2B                       | <b>3.39E-03</b> | 7.46E-02        | 9.75E-02        | 4.76E-01        | 2.13E-01        | 3.71E-01        | <b>3.45E-06</b> | <b>5.62E-04</b> | 3.39E-01        | 1.45E-01        | 2.66E-01        |
| chr4:25198751:D  | PI4K2B                       | <b>3.43E-03</b> | 7.52E-02        | 9.81E-02        | 4.78E-01        | 2.13E-01        | 3.71E-01        | <b>3.46E-06</b> | <b>5.61E-04</b> | 3.38E-01        | 1.45E-01        | 2.66E-01        |
| rs73252549       | PI4K2B                       | NA              | NA              | 1.00E-01        | 5.04E-01        | NA              | NA              | <b>3.42E-06</b> | <b>5.62E-04</b> | 8.60E-01        | 9.65E-01        | 1.37E-01        |
| rs73252550       | PI4K2B                       | NA              | NA              | 1.00E-01        | 5.05E-01        | NA              | NA              | <b>3.43E-06</b> | <b>5.62E-04</b> | 8.60E-01        | 9.65E-01        | 1.36E-01        |
| rs73252551       | PI4K2B                       | NA              | NA              | 1.01E-01        | 5.09E-01        | NA              | NA              | <b>3.44E-06</b> | <b>5.62E-04</b> | 8.58E-01        | 9.64E-01        | 1.37E-01        |
| rs73252553       | PI4K2B                       | <b>3.49E-03</b> | 7.74E-02        | 1.01E-01        | 4.89E-01        | 1.72E-01        | 3.50E-01        | <b>3.50E-06</b> | <b>5.62E-04</b> | 3.38E-01        | 1.44E-01        | 2.65E-01        |
| chr4:25202768:I  | PI4K2B                       | <b>3.54E-03</b> | 7.91E-02        | 1.03E-01        | 4.94E-01        | 1.70E-01        | 3.45E-01        | <b>3.53E-06</b> | <b>5.62E-04</b> | 3.38E-01        | 1.44E-01        | 2.65E-01        |

|                 |                             |                 |                 |                 |                 |                 |                 |                 |                 |                 |                 |                 |
|-----------------|-----------------------------|-----------------|-----------------|-----------------|-----------------|-----------------|-----------------|-----------------|-----------------|-----------------|-----------------|-----------------|
| rs73252554      | PI4K2B                      | <b>3.59E-03</b> | 8.16E-02        | 1.06E-01        | 5.02E-01        | 1.66E-01        | 3.39E-01        | <b>3.59E-06</b> | <b>5.62E-04</b> | 3.36E-01        | 1.42E-01        | 2.65E-01        |
| rs73252555      | PI4K2B                      | <b>5.90E-03</b> | 1.13E-01        | 1.15E-01        | 5.22E-01        | 1.59E-01        | 3.52E-01        | <b>4.23E-06</b> | <b>6.76E-04</b> | 3.90E-01        | 1.75E-01        | 2.97E-01        |
| rs73252556      | PI4K2B                      | NA              | NA              | 1.18E-01        | 5.49E-01        | NA              | NA              | <b>4.19E-06</b> | <b>6.79E-04</b> | 8.43E-01        | 9.56E-01        | 1.56E-01        |
| rs55638051      | PI4K2B                      | <b>5.89E-03</b> | 1.14E-01        | 1.15E-01        | 5.23E-01        | 1.58E-01        | 3.52E-01        | <b>4.24E-06</b> | <b>6.76E-04</b> | 3.90E-01        | 1.76E-01        | 2.97E-01        |
| rs73252557      | PI4K2B                      | <b>5.93E-03</b> | 1.14E-01        | 1.15E-01        | 5.24E-01        | 1.58E-01        | 3.51E-01        | <b>4.24E-06</b> | <b>6.77E-04</b> | 3.90E-01        | 1.76E-01        | 2.97E-01        |
| rs424573        | PI4K2B                      | <b>5.75E-03</b> | 1.15E-01        | 1.24E-01        | 5.45E-01        | 1.56E-01        | 3.48E-01        | <b>4.49E-06</b> | <b>6.87E-04</b> | 3.98E-01        | 1.79E-01        | 2.95E-01        |
| rs409131        | PI4K2B                      | <b>5.74E-03</b> | 1.15E-01        | 1.25E-01        | 5.47E-01        | 1.55E-01        | 3.48E-01        | <b>4.52E-06</b> | <b>6.89E-04</b> | 3.98E-01        | 1.79E-01        | 2.95E-01        |
| rs313574        | PI4K2B                      | <b>5.68E-03</b> | 1.17E-01        | 1.33E-01        | 5.65E-01        | 1.54E-01        | 3.46E-01        | <b>4.76E-06</b> | <b>6.99E-04</b> | 4.04E-01        | 1.82E-01        | 2.94E-01        |
| rs313573        | PI4K2B                      | <b>4.97E-02</b> | 2.53E-01        | 2.49E-01        | 6.32E-01        | <b>3.38E-02</b> | 1.03E-01        | <b>5.45E-05</b> | <b>2.41E-03</b> | 7.07E-01        | 2.24E-01        | 2.99E-01        |
| rs313570        | RP11-660M5.1,PI4K2B         | <b>5.50E-03</b> | 1.16E-01        | 1.35E-01        | 5.71E-01        | 1.56E-01        | 3.48E-01        | <b>4.67E-06</b> | <b>6.96E-04</b> | 4.01E-01        | 1.81E-01        | 2.94E-01        |
| rs313569        | RP11-660M5.1,PI4K2B         | <b>4.00E-02</b> | 3.76E-01        | 1.32E-01        | 5.44E-01        | <b>3.57E-02</b> | 2.09E-01        | <b>4.09E-06</b> | <b>5.60E-04</b> | 6.06E-01        | 2.88E-01        | 3.16E-01        |
| rs313579        | RP11-660M5.1,PI4K2B         | <b>5.65E-03</b> | 1.14E-01        | 1.33E-01        | 5.59E-01        | 1.38E-01        | 3.28E-01        | <b>4.81E-06</b> | <b>6.91E-04</b> | 4.94E-01        | 2.45E-01        | 2.92E-01        |
| rs313578        | PI4K2B,RP11-660M5.1         | <b>4.90E-02</b> | 2.72E-01        | 2.35E-01        | 6.38E-01        | <b>1.57E-03</b> | <b>4.56E-03</b> | <b>5.38E-05</b> | <b>2.36E-03</b> | 7.35E-01        | 5.53E-01        | 3.58E-01        |
| rs313576        | RP11-660M5.1,PI4K2B         | <b>4.45E-02</b> | 2.54E-01        | 2.35E-01        | 6.39E-01        | <b>1.25E-03</b> | <b>2.56E-03</b> | <b>5.35E-05</b> | <b>2.33E-03</b> | 7.36E-01        | 5.58E-01        | 3.60E-01        |
| rs313575        | RP11-660M5.1,PI4K2B         | NA              | NA              | 1.45E-01        | 6.14E-01        | NA              | NA              | <b>4.84E-06</b> | <b>6.90E-04</b> | 8.34E-01        | 9.59E-01        | 1.54E-01        |
| rs3115231       | PI4K2B                      | 7.88E-02        | 1.78E-01        | 5.91E-02        | 3.17E-01        | <b>2.73E-02</b> | 1.28E-01        | <b>9.22E-06</b> | <b>9.74E-04</b> | 6.93E-01        | 8.87E-01        | 1.72E-01        |
| rs188759        | PI4K2B                      | <b>2.89E-03</b> | 7.43E-02        | 1.37E-01        | 5.71E-01        | 1.50E-01        | 3.35E-01        | <b>5.17E-06</b> | <b>7.10E-04</b> | 4.19E-01        | 2.26E-01        | 2.95E-01        |
| rs313547        | PI4K2B                      | <b>1.95E-03</b> | <b>1.38E-02</b> | 2.31E-01        | 7.33E-01        | <b>4.92E-03</b> | <b>2.23E-02</b> | <b>4.67E-05</b> | <b>2.31E-03</b> | 7.77E-01        | 9.36E-01        | 3.39E-01        |
| rs313544        | PI4K2B                      | <b>3.99E-03</b> | <b>2.96E-02</b> | 1.31E-01        | 5.49E-01        | <b>1.31E-02</b> | <b>4.31E-02</b> | <b>1.09E-05</b> | <b>1.10E-03</b> | 7.58E-01        | 8.40E-01        | 3.56E-01        |
| rs313553        | PI4K2B                      | <b>4.15E-03</b> | <b>3.21E-02</b> | 1.34E-01        | 5.57E-01        | <b>1.47E-02</b> | <b>4.55E-02</b> | <b>1.01E-05</b> | <b>1.08E-03</b> | 7.67E-01        | 8.63E-01        | 3.59E-01        |
| rs183170687     | PI4K2B                      | NA              | NA              | 1.54E-01        | 6.30E-01        | NA              | NA              | <b>6.80E-06</b> | <b>9.03E-04</b> | 8.29E-01        | 9.55E-01        | 1.52E-01        |
| rs313560        | PI4K2B                      | <b>5.10E-03</b> | <b>4.07E-02</b> | 1.87E-01        | 6.57E-01        | 2.40E-01        | 3.86E-01        | <b>6.06E-06</b> | <b>8.01E-04</b> | 7.05E-01        | 8.73E-01        | 3.25E-01        |
| rs313566        | PI4K2B                      | 3.01E-01        | 3.89E-01        | 1.19E-01        | 5.09E-01        | 4.02E-01        | 7.50E-01        | <b>1.63E-05</b> | <b>1.78E-03</b> | 5.49E-01        | 7.99E-01        | 7.50E-02        |
| rs313536        | PI4K2B                      | <b>4.34E-03</b> | 1.09E-01        | 1.81E-01        | 7.05E-01        | 1.92E-01        | 3.57E-01        | <b>3.65E-06</b> | <b>5.41E-04</b> | 2.11E-01        | 1.48E-01        | 3.22E-01        |
| rs313542        | PI4K2B                      | NA              | NA              | 8.76E-01        | 4.92E-01        | NA              | NA              | <b>7.12E-10</b> | <b>1.73E-05</b> | 7.78E-01        | 7.45E-01        | <b>7.25E-03</b> |
| rs313540        | PI4K2B                      | NA              | NA              | 2.12E-01        | 7.76E-01        | NA              | NA              | <b>2.92E-06</b> | <b>4.85E-04</b> | 9.13E-01        | 8.67E-01        | 1.67E-01        |
| rs313539        | PI4K2B                      | <b>5.45E-03</b> | 1.21E-01        | 1.90E-01        | 7.22E-01        | 1.95E-01        | 3.61E-01        | <b>2.92E-06</b> | <b>4.85E-04</b> | 2.25E-01        | 1.58E-01        | 3.16E-01        |
| rs313538        | PI4K2B                      | <b>5.56E-03</b> | 1.22E-01        | 1.91E-01        | 7.24E-01        | 1.95E-01        | 3.61E-01        | <b>2.92E-06</b> | <b>4.85E-04</b> | 2.26E-01        | 1.59E-01        | 3.16E-01        |
| rs3115232       | PI4K2B                      | <b>1.10E-02</b> | 1.88E-01        | 2.20E-01        | 7.63E-01        | 1.98E-01        | 3.65E-01        | <b>2.85E-06</b> | <b>4.83E-04</b> | 2.33E-01        | 1.63E-01        | 3.14E-01        |
| rs180854188     | PI4K2B                      | 3.99E-01        | 8.47E-01        | 1.55E-01        | 6.40E-01        | <b>3.98E-02</b> | 1.88E-01        | <b>1.43E-05</b> | <b>2.62E-03</b> | 6.85E-01        | 6.66E-01        | 1.80E-01        |
| rs313533        | PI4K2B                      | <b>6.49E-04</b> | 1.30E-01        | 2.20E-01        | 7.63E-01        | 1.98E-01        | 3.65E-01        | <b>2.53E-06</b> | <b>4.93E-04</b> | 2.36E-01        | 1.66E-01        | 3.14E-01        |
| rs12511593      | PI4K2B,PI4K2B-ZCCHC4        | <b>8.87E-04</b> | <b>7.85E-03</b> | 9.05E-01        | 4.34E-01        | <b>2.25E-02</b> | 1.02E-01        | <b>6.25E-06</b> | <b>2.77E-03</b> | <b>9.11E-03</b> | <b>6.87E-03</b> | 3.25E-01        |
| rs7689780       | PI4K2B,PI4K2B-ZCCHC4        | <b>1.08E-03</b> | <b>9.48E-03</b> | 6.27E-01        | 6.94E-01        | <b>3.30E-02</b> | 1.20E-01        | <b>4.63E-07</b> | <b>1.26E-04</b> | 5.71E-02        | <b>2.63E-02</b> | 5.27E-01        |
| rs10433834      | PI4K2B,PI4K2B-ZCCHC4        | NA              | NA              | 2.63E-01        | 8.39E-01        | NA              | NA              | <b>2.54E-06</b> | <b>5.00E-04</b> | 9.33E-01        | 8.80E-01        | 1.67E-01        |
| rs1818426       | PI4K2B-ZCCHC4               | NA              | NA              | 2.62E-01        | 8.41E-01        | NA              | NA              | <b>2.48E-06</b> | <b>5.05E-04</b> | 9.30E-01        | 8.75E-01        | 1.67E-01        |
| rs9884670       | PI4K2B-ZCCHC4               | NA              | NA              | 2.63E-01        | 8.40E-01        | NA              | NA              | <b>2.54E-06</b> | <b>5.03E-04</b> | 9.28E-01        | 8.74E-01        | 1.66E-01        |
| chr4:25289189:i | PI4K2B-ZCCHC4               | NA              | NA              | 2.45E-01        | 8.25E-01        | 1.83E-01        | 5.17E-01        | <b>4.39E-06</b> | <b>1.79E-03</b> | 4.64E-01        | 4.41E-01        | 1.29E-01        |
| rs4697558       | PI4K2B-ZCCHC4               | NA              | NA              | 2.48E-01        | 8.20E-01        | NA              | NA              | <b>2.56E-06</b> | <b>5.12E-04</b> | 9.41E-01        | 8.86E-01        | 1.76E-01        |
| rs316804        | ZCCHC4,PI4K2B-ZCCHC4        | 3.69E-01        | 3.04E-01        | 6.58E-02        | 3.83E-01        | 1.27E-01        | 1.84E-01        | <b>8.54E-06</b> | <b>2.58E-03</b> | 3.79E-01        | 2.35E-01        | 2.69E-01        |
| rs316776        | AC108218.1,ZCCHC4           | 5.09E-02        | 1.48E-01        | <b>8.75E-03</b> | 8.99E-02        | 4.17E-01        | 6.72E-01        | <b>1.41E-03</b> | <b>2.92E-02</b> | <b>3.39E-02</b> | <b>4.97E-02</b> | 8.20E-01        |
| rs316777        | AC108218.1,ZCCHC4           | 5.07E-02        | 1.48E-01        | <b>8.75E-03</b> | 8.99E-02        | 4.17E-01        | 6.72E-01        | <b>1.28E-03</b> | <b>2.60E-02</b> | <b>3.39E-02</b> | <b>4.97E-02</b> | 8.22E-01        |
| rs315684        | ANAPC4,ZCCHC4,ZCCHC4-ANAPC4 | 5.01E-02        | 1.44E-01        | <b>7.31E-03</b> | 7.96E-02        | 4.28E-01        | 6.66E-01        | <b>1.05E-03</b> | <b>2.10E-02</b> | <b>2.86E-02</b> | <b>4.48E-02</b> | 9.70E-01        |
| rs315682        | ANAPC4,ZCCHC4-ANAPC4        | 8.99E-02        | 2.00E-01        | <b>1.01E-02</b> | 1.00E-01        | 4.39E-01        | 7.50E-01        | <b>1.16E-03</b> | <b>2.52E-02</b> | <b>2.23E-02</b> | <b>3.50E-02</b> | 9.72E-01        |
| rs4697570       | ANAPC4-RP11-206P5.1         | 5.80E-01        | 7.97E-01        | <b>2.29E-03</b> | <b>2.06E-02</b> | 4.84E-01        | 3.45E-01        | <b>2.66E-04</b> | <b>1.66E-02</b> | 6.97E-01        | 8.71E-01        | 5.32E-01        |
| rs6824813       | RP11-8L2.1                  | <b>7.07E-06</b> | <b>4.29E-05</b> | 6.73E-01        | 7.86E-01        | 9.01E-02        | 6.01E-02        | 4.72E-01        | 7.39E-01        | 8.25E-02        | 1.43E-01        | NA              |
| rs10000269      | SEC24D                      | <b>2.47E-05</b> | <b>6.65E-04</b> | NA              | NA              | 3.62E-01        | 4.61E-01        | NA              | NA              | <b>1.68E-02</b> | <b>1.66E-02</b> | NA              |

|                  |                                    |                 |                 |                 |                 |                 |                 |                 |                 |                 |                 |                 |
|------------------|------------------------------------|-----------------|-----------------|-----------------|-----------------|-----------------|-----------------|-----------------|-----------------|-----------------|-----------------|-----------------|
| rs28651948       | SEC24D                             | <b>5.10E-06</b> | <b>2.29E-04</b> | NA              | NA              | 3.64E-01        | 4.62E-01        | NA              | NA              | <b>1.68E-02</b> | <b>1.66E-02</b> | NA              |
| rs139968109      | SEC24D                             | <b>4.04E-06</b> | <b>1.97E-04</b> | NA              | NA              | 3.70E-01        | 4.70E-01        | NA              | NA              | <b>1.66E-02</b> | <b>1.64E-02</b> | NA              |
| rs28595532       | SEC24D                             | <b>9.96E-06</b> | <b>3.30E-04</b> | 3.13E-01        | 1.60E-01        | 6.08E-02        | 1.68E-01        | 4.57E-01        | 6.04E-01        | <b>4.67E-02</b> | 6.55E-02        | 3.07E-01        |
| rs11098451       | SEC24D                             | <b>3.82E-05</b> | <b>7.20E-04</b> | 2.46E-01        | 1.01E-01        | 2.85E-01        | 5.79E-01        | 4.52E-01        | 5.98E-01        | <b>1.42E-03</b> | <b>1.11E-02</b> | 2.42E-01        |
| chr4:124629474:D | LINC01091                          | <b>2.56E-05</b> | <b>8.86E-05</b> | NA              | NA              | NA              | NA              | NA              | NA              | <b>2.54E-02</b> | <b>2.26E-02</b> | NA              |
| rs4572830        | -294O2.2,RP11-294O2.2-RP11-366     | <b>3.92E-02</b> | 6.02E-02        | 1.32E-01        | 1.38E-01        | <b>1.49E-02</b> | <b>3.93E-03</b> | 9.32E-02        | 6.00E-02        | 2.15E-01        | 1.44E-01        | <b>9.54E-03</b> |
| rs13140317       | -294O2.2,RP11-294O2.2-RP11-366     | <b>3.51E-03</b> | <b>3.81E-03</b> | 1.06E-01        | 1.41E-01        | <b>4.56E-02</b> | <b>1.41E-02</b> | 1.45E-01        | 8.01E-02        | 2.08E-01        | 7.90E-02        | <b>8.10E-03</b> |
| rs12508887       | -294O2.2,RP11-294O2.2-RP11-366     | <b>3.05E-03</b> | <b>1.96E-03</b> | 1.07E-01        | 1.55E-01        | <b>1.87E-02</b> | <b>8.35E-03</b> | 1.32E-01        | 6.92E-02        | 1.30E-01        | 6.16E-02        | <b>6.77E-03</b> |
| rs13125630       | RP11-294O2.2-RP11-366M4.3          | <b>7.28E-03</b> | <b>9.92E-03</b> | 1.87E-01        | 1.95E-01        | <b>2.31E-02</b> | <b>6.21E-03</b> | 1.08E-01        | 1.09E-01        | 1.42E-01        | 9.59E-02        | <b>1.19E-02</b> |
| rs79623836       | CTNND2                             | <b>2.54E-02</b> | <b>3.90E-02</b> | NA              | NA              | <b>1.01E-02</b> | <b>1.15E-02</b> | NA              | NA              | <b>4.62E-05</b> | <b>3.98E-04</b> | NA              |
| rs116226119      | CTNND2                             | <b>2.53E-02</b> | <b>3.73E-02</b> | NA              | NA              | <b>1.23E-02</b> | <b>1.32E-02</b> | NA              | NA              | <b>8.70E-05</b> | <b>6.28E-04</b> | NA              |
| rs114311699      | CTNND2                             | <b>2.73E-02</b> | <b>1.50E-02</b> | NA              | NA              | <b>6.14E-03</b> | <b>9.82E-03</b> | NA              | NA              | <b>5.59E-05</b> | <b>1.60E-03</b> | NA              |
| rs62352163       | CDH18                              | <b>2.65E-02</b> | <b>2.65E-02</b> | <b>1.33E-02</b> | <b>4.34E-02</b> | <b>3.34E-02</b> | <b>4.18E-02</b> | <b>1.01E-02</b> | <b>4.01E-02</b> | 5.23E-01        | 8.28E-01        | 4.34E-01        |
| rs4704367        | RN7SL208P-S100Z                    | <b>1.35E-03</b> | <b>1.80E-03</b> | 2.06E-01        | 2.55E-01        | <b>5.03E-04</b> | <b>3.99E-02</b> | 3.83E-01        | 7.15E-01        | 3.45E-01        | 6.33E-01        | <b>4.37E-02</b> |
| rs74704845       | PRR16-RNU4-69P                     | <b>1.67E-06</b> | <b>1.94E-04</b> | NA              | NA              | NA              | NA              | NA              | NA              | 5.46E-01        | 6.13E-01        | NA              |
| rs2033454        | AC008703.2-AC008691.1              | <b>1.59E-06</b> | <b>1.33E-04</b> | NA              | NA              | 2.67E-01        | 4.59E-01        | NA              | NA              | 7.24E-02        | <b>3.46E-02</b> | NA              |
| rs73323306       | ARL2BPP5-RP11-541P9.3              | 2.42E-01        | 2.70E-01        | NA              | NA              | <b>7.61E-09</b> | <b>6.60E-06</b> | NA              | NA              | 7.39E-01        | 3.91E-01        | NA              |
| rs2878892        | NM2,TENM2,TENM2,TENM2,TENM2        | <b>1.56E-02</b> | <b>3.93E-03</b> | <b>3.36E-02</b> | 7.80E-02        | 6.65E-02        | 6.82E-02        | <b>1.24E-02</b> | <b>8.97E-03</b> | 5.69E-01        | 4.60E-01        | <b>3.84E-02</b> |
| rs10066744       | \1,COL23A1,COL23A1,COL23A1,COL23A1 | <b>8.05E-05</b> | <b>3.86E-04</b> | NA              | NA              | <b>4.41E-03</b> | 1.45E-01        | NA              | NA              | 9.46E-01        | 9.26E-01        | NA              |
| rs116319917      | GMD5                               | <b>3.69E-05</b> | <b>7.71E-06</b> | NA              | NA              | <b>3.36E-02</b> | 7.23E-02        | NA              | NA              | <b>1.17E-02</b> | 1.18E-01        | NA              |
| rs1202310        | ID4-RP1-130G2.1                    | 6.55E-01        | 3.71E-01        | <b>5.09E-05</b> | <b>2.38E-04</b> | 7.97E-01        | 5.91E-01        | <b>6.09E-03</b> | 1.28E-01        | 2.96E-01        | 3.47E-01        | 6.64E-01        |
| chr6:19952232:D  | ID4-RP1-130G2.1                    | 6.06E-02        | 5.74E-02        | <b>1.03E-04</b> | <b>7.75E-04</b> | 6.55E-01        | 4.43E-01        | <b>1.08E-02</b> | 7.31E-02        | 8.46E-01        | 6.17E-01        | 4.02E-01        |
| rs12190760       | ID4-RP1-130G2.1                    | <b>8.35E-03</b> | <b>1.36E-02</b> | <b>3.11E-05</b> | <b>2.74E-04</b> | 4.28E-01        | 9.29E-01        | <b>1.13E-02</b> | 1.22E-01        | 7.75E-01        | 5.21E-01        | 5.17E-01        |
| rs12193640       | ID4-RP1-130G2.1                    | <b>2.02E-02</b> | 5.62E-02        | <b>7.64E-05</b> | <b>5.56E-04</b> | 6.78E-01        | 8.40E-01        | <b>1.14E-02</b> | 1.04E-01        | 6.92E-01        | 4.63E-01        | 5.46E-01        |
| rs114982299      | LTB,LST1,LTB-LST1                  | NA              | NA              | <b>1.65E-02</b> | <b>1.37E-02</b> | NA              | NA              | <b>1.39E-05</b> | <b>6.22E-05</b> | 4.07E-01        | 2.80E-01        | 8.17E-01        |
| rs72906044       | FTH1P5-RP3-437C15.2                | 8.12E-02        | 9.86E-02        | <b>1.37E-02</b> | <b>4.33E-03</b> | 8.44E-01        | 7.98E-01        | <b>1.72E-04</b> | <b>1.74E-03</b> | 3.80E-01        | 2.87E-01        | <b>2.04E-02</b> |
| chr6:51199846:D  | FTH1P5-RP3-437C15.2                | 6.71E-02        | 8.27E-02        | <b>1.56E-02</b> | <b>4.37E-03</b> | 9.65E-01        | 7.41E-01        | <b>3.53E-05</b> | <b>1.09E-04</b> | 3.55E-01        | 2.59E-01        | <b>4.98E-02</b> |
| rs17665889       | FTH1P5-RP3-437C15.2                | <b>4.69E-02</b> | 5.92E-02        | <b>1.25E-02</b> | <b>2.77E-03</b> | 8.30E-01        | 8.08E-01        | <b>4.87E-05</b> | <b>4.71E-04</b> | 3.49E-01        | 2.86E-01        | <b>1.45E-02</b> |
| rs16881418       | FTH1P5-RP3-437C15.2                | 6.42E-02        | 9.28E-02        | <b>7.63E-03</b> | <b>1.61E-03</b> | 8.14E-01        | 7.82E-01        | <b>3.23E-04</b> | <b>1.81E-03</b> | 3.92E-01        | 3.02E-01        | <b>2.28E-02</b> |
| rs7738302        | FTH1P5-RP3-437C15.2                | 5.61E-02        | 7.38E-02        | <b>8.28E-03</b> | <b>2.52E-03</b> | 9.02E-01        | 7.65E-01        | <b>1.11E-04</b> | <b>9.47E-04</b> | 3.87E-01        | 2.87E-01        | <b>1.70E-02</b> |
| rs12529854       | FTH1P5-RP3-437C15.2                | 5.68E-02        | 7.52E-02        | <b>8.40E-03</b> | <b>2.52E-03</b> | 9.08E-01        | 7.61E-01        | <b>1.17E-04</b> | <b>9.77E-04</b> | 3.90E-01        | 2.92E-01        | <b>1.87E-02</b> |
| rs1327284        | P3-437C15.2,FTH1P5-RP3-437C15.2    | 7.27E-02        | 9.28E-02        | <b>1.03E-02</b> | <b>2.92E-03</b> | 9.80E-01        | 6.77E-01        | <b>9.80E-05</b> | <b>1.03E-03</b> | 3.56E-01        | 2.84E-01        | <b>1.94E-02</b> |
| rs10498783       | 437C15.2,RP3-437C15.2-RP3-437C15.2 | 7.64E-02        | 9.75E-02        | <b>1.01E-02</b> | <b>2.88E-03</b> | 9.86E-01        | 6.73E-01        | <b>9.75E-05</b> | <b>1.01E-03</b> | 3.78E-01        | 3.03E-01        | <b>1.91E-02</b> |
| rs1327280        | 437C15.2,RP3-437C15.2-RP3-437C15.2 | 9.08E-02        | 1.17E-01        | <b>6.75E-03</b> | <b>1.75E-03</b> | 9.03E-01        | 7.73E-01        | <b>2.06E-04</b> | <b>2.46E-03</b> | 4.01E-01        | 3.23E-01        | <b>1.84E-02</b> |
| chr6:51255307:D  | 437C15.2,RP3-437C15.2-RP3-437C15.2 | 8.60E-02        | 1.09E-01        | <b>1.00E-02</b> | <b>2.78E-03</b> | 9.74E-01        | 6.79E-01        | <b>9.85E-05</b> | <b>1.03E-03</b> | 4.22E-01        | 3.41E-01        | <b>1.84E-02</b> |
| rs12527522       | 437C15.1,RP3-437C15.2-RP3-437C15.2 | NA              | NA              | <b>1.26E-02</b> | <b>3.03E-03</b> | NA              | NA              | <b>3.91E-04</b> | <b>2.30E-03</b> | 9.94E-01        | 6.38E-01        | <b>3.38E-02</b> |
| rs6940087        | 437C15.1,RP3-437C15.2-RP3-437C15.2 | 1.01E-01        | 8.79E-02        | <b>4.61E-02</b> | <b>1.03E-02</b> | 7.99E-01        | 7.79E-01        | <b>5.27E-04</b> | <b>2.13E-03</b> | 5.32E-01        | 5.63E-01        | <b>2.84E-02</b> |
| rs72906075       | 3-437C15.1,RP3-437C15.1-SNORD66    | 2.44E-01        | 2.59E-01        | <b>3.68E-02</b> | <b>7.27E-03</b> | 8.58E-01        | 8.09E-01        | <b>5.33E-04</b> | <b>2.16E-03</b> | 3.90E-01        | 4.30E-01        | <b>2.59E-02</b> |
| rs1857188        | 3-437C15.1,RP3-437C15.1-SNORD66    | 1.56E-01        | 1.29E-01        | <b>4.82E-02</b> | <b>9.59E-03</b> | 5.78E-01        | 9.55E-01        | <b>4.75E-05</b> | <b>4.32E-04</b> | 4.62E-01        | 5.05E-01        | <b>3.82E-02</b> |
| rs111885630      | RP3-437C15.1-SNORD66               | 8.09E-02        | 7.39E-02        | <b>4.57E-02</b> | <b>9.89E-03</b> | 7.59E-01        | 8.53E-01        | <b>5.70E-04</b> | <b>2.22E-03</b> | 5.90E-01        | 6.26E-01        | <b>2.71E-02</b> |
| rs12524614       | RP3-437C15.1-SNORD66               | 9.37E-02        | 8.06E-02        | <b>4.57E-02</b> | <b>9.88E-03</b> | 7.99E-01        | 7.81E-01        | <b>5.82E-04</b> | <b>2.24E-03</b> | 4.98E-01        | 5.51E-01        | <b>2.68E-02</b> |
| rs16881457       | RP3-437C15.1-SNORD66               | 3.05E-01        | 2.38E-01        | <b>2.88E-02</b> | <b>5.34E-03</b> | 8.57E-01        | 4.89E-01        | <b>5.42E-04</b> | <b>2.26E-03</b> | 9.36E-01        | 8.23E-01        | <b>3.98E-02</b> |
| rs16881462       | RP3-437C15.1-SNORD66               | 3.44E-01        | 2.80E-01        | <b>3.57E-02</b> | <b>9.09E-03</b> | 7.67E-01        | 3.98E-01        | <b>3.12E-04</b> | <b>1.68E-03</b> | 9.78E-01        | 7.81E-01        | <b>3.94E-02</b> |
| rs72900275       | RP3-437C15.1-SNORD66               | 3.57E-01        | 5.34E-01        | <b>1.13E-02</b> | <b>2.27E-03</b> | 8.42E-01        | 7.16E-01        | <b>5.67E-04</b> | <b>1.96E-03</b> | 1.83E-01        | 1.66E-01        | 9.06E-02        |
| rs72900278       | RP3-437C15.1-SNORD66               | 3.48E-01        | 5.19E-01        | <b>1.19E-02</b> | <b>2.48E-03</b> | 8.03E-01        | 4.95E-01        | <b>8.23E-04</b> | <b>2.25E-03</b> | 2.02E-01        | 2.18E-01        | 7.15E-02        |
| rs16881539       | SNORD66-RP11-793K1.1               | 8.43E-01        | 8.48E-01        | <b>6.34E-03</b> | <b>1.24E-03</b> | 8.86E-01        | 7.47E-01        | <b>1.31E-03</b> | <b>5.38E-03</b> | 1.12E-01        | 9.87E-02        | 1.09E-01        |



|                 |                               |                 |                 |                 |                 |                 |                 |                 |                 |                 |                 |                 |
|-----------------|-------------------------------|-----------------|-----------------|-----------------|-----------------|-----------------|-----------------|-----------------|-----------------|-----------------|-----------------|-----------------|
| rs17814136      | SNORD66-RP11-793K1.1          | 5.13E-01        | 7.36E-01        | <b>6.09E-03</b> | <b>1.19E-03</b> | 8.61E-01        | 8.12E-01        | <b>1.20E-03</b> | <b>5.19E-03</b> | 2.10E-01        | 1.55E-01        | 1.09E-01        |
| rs60207381      | SNORD66-RP11-793K1.1          | 5.32E-01        | 7.44E-01        | <b>8.03E-03</b> | <b>1.73E-03</b> | 8.41E-01        | 8.29E-01        | <b>1.17E-03</b> | <b>5.12E-03</b> | 2.21E-01        | 1.62E-01        | 9.96E-02        |
| rs74536655      | SNORD66-RP11-793K1.1          | 7.56E-01        | 9.97E-01        | <b>5.93E-03</b> | <b>1.10E-03</b> | 7.97E-01        | 8.21E-01        | <b>1.16E-03</b> | <b>5.16E-03</b> | 1.28E-01        | 1.10E-01        | 8.87E-02        |
| rs72902183      | SNORD66-RP11-793K1.1          | 4.86E-01        | 7.02E-01        | <b>7.30E-03</b> | <b>1.45E-03</b> | 7.76E-01        | 8.74E-01        | <b>1.15E-03</b> | <b>5.16E-03</b> | 2.55E-01        | 2.18E-01        | 9.48E-02        |
| rs12528509      | SNORD66-RP11-793K1.1          | 7.54E-01        | 1.00E+00        | <b>5.79E-03</b> | <b>1.07E-03</b> | 7.98E-01        | 8.20E-01        | <b>1.19E-03</b> | <b>5.28E-03</b> | 1.24E-01        | 1.05E-01        | 8.82E-02        |
| rs12528978      | SNORD66-RP11-793K1.1          | 4.84E-01        | 6.98E-01        | <b>7.26E-03</b> | <b>1.45E-03</b> | 7.75E-01        | 8.75E-01        | <b>1.15E-03</b> | <b>5.17E-03</b> | 2.54E-01        | 2.19E-01        | 9.49E-02        |
| rs13209289      | DST                           | NA              | NA              | <b>3.03E-04</b> | <b>1.23E-04</b> | NA              | NA              | <b>1.22E-03</b> | <b>6.70E-03</b> | NA              | NA              | 1.72E-01        |
| rs11751461      | OSTCP6,BEND6                  | NA              | NA              | <b>7.01E-04</b> | <b>4.16E-04</b> | NA              | NA              | <b>2.23E-03</b> | <b>1.11E-02</b> | NA              | NA              | 1.39E-01        |
| rs189276636     | AGMO,AGMO,AGMO                | <b>1.71E-04</b> | <b>1.83E-04</b> | NA              | NA              | 2.27E-01        | 5.48E-01        | NA              | NA              | <b>1.35E-03</b> | <b>1.71E-03</b> | NA              |
| rs10267821      | RN7SL292P-RP11-153N17.1       | <b>1.76E-03</b> | <b>5.13E-03</b> | NA              | NA              | 8.20E-01        | 5.69E-01        | NA              | NA              | <b>5.72E-06</b> | <b>6.07E-05</b> | NA              |
| rs28507362      | RN7SL292P-RP11-153N17.1       | <b>1.29E-03</b> | <b>3.88E-03</b> | NA              | NA              | 9.02E-01        | 6.70E-01        | NA              | NA              | <b>4.92E-06</b> | <b>6.77E-05</b> | NA              |
| rs6967571       | RN7SL292P-RP11-153N17.1       | <b>4.83E-04</b> | <b>1.47E-03</b> | NA              | NA              | 6.62E-01        | 4.27E-01        | NA              | NA              | <b>3.34E-06</b> | <b>8.72E-05</b> | NA              |
| chr7:75707519:D | O05077.14,AC005077.14-RNU6-86 | <b>3.13E-02</b> | <b>1.98E-02</b> | <b>3.90E-02</b> | <b>3.64E-02</b> | 3.90E-01        | 1.65E-01        | <b>8.96E-04</b> | <b>6.99E-04</b> | 1.01E-01        | 2.76E-01        | 2.14E-01        |
| rs2732768       | SEMA3D-AC073958.2             | 6.45E-01        | 9.59E-01        | 2.22E-01        | 3.80E-01        | 4.21E-01        | 7.78E-01        | <b>2.04E-05</b> | <b>1.61E-04</b> | 3.42E-01        | 5.90E-01        | <b>1.80E-02</b> |
| rs12534830      | SEMA3D-AC073958.2             | <b>4.67E-02</b> | <b>3.59E-02</b> | 2.91E-01        | 3.37E-01        | 6.75E-02        | 4.65E-01        | <b>3.36E-06</b> | <b>5.51E-05</b> | 4.40E-01        | 4.82E-01        | 7.65E-02        |
| rs4143206       | SEMA3D-AC073958.2             | 9.74E-01        | 7.75E-01        | 2.01E-01        | 3.51E-01        | 7.19E-01        | 4.67E-01        | <b>2.00E-05</b> | <b>1.21E-04</b> | <b>2.79E-02</b> | <b>3.06E-02</b> | <b>2.28E-02</b> |
| rs2732766       | SEMA3D-AC073958.2             | 8.36E-01        | 5.52E-01        | 1.27E-01        | 2.33E-01        | 1.55E-01        | 3.83E-01        | <b>2.71E-05</b> | <b>2.12E-04</b> | 8.58E-01        | 8.59E-01        | <b>1.75E-02</b> |
| rs1405974       | SEMA3D-AC073958.2             | 8.39E-01        | 5.55E-01        | 1.26E-01        | 2.36E-01        | 1.56E-01        | 3.81E-01        | <b>2.46E-05</b> | <b>2.07E-04</b> | 8.78E-01        | 8.37E-01        | <b>1.72E-02</b> |
| rs1346686       | SEMA3D-AC073958.2             | 9.75E-01        | 7.76E-01        | 2.19E-01        | 3.92E-01        | 7.21E-01        | 4.68E-01        | <b>1.87E-05</b> | <b>1.69E-04</b> | <b>2.78E-02</b> | <b>3.03E-02</b> | <b>2.57E-02</b> |
| rs2732765       | SEMA3D-AC073958.2             | 8.41E-01        | 5.55E-01        | 1.25E-01        | 2.34E-01        | 1.67E-01        | 4.00E-01        | <b>2.50E-05</b> | <b>2.05E-04</b> | 8.83E-01        | 8.33E-01        | <b>1.49E-02</b> |
| rs2732764       | SEMA3D-AC073958.2             | 8.38E-01        | 5.55E-01        | 1.27E-01        | 2.36E-01        | 1.57E-01        | 3.82E-01        | <b>2.45E-05</b> | <b>2.06E-04</b> | 8.78E-01        | 8.37E-01        | <b>1.72E-02</b> |
| rs2564777       | SEMA3D-AC073958.2             | 8.75E-01        | 5.94E-01        | 1.25E-01        | 2.44E-01        | 1.74E-01        | 4.15E-01        | <b>2.57E-05</b> | <b>2.05E-04</b> | 8.76E-01        | 8.38E-01        | <b>1.78E-02</b> |
| rs2564778       | SEMA3D-AC073958.2             | 8.38E-01        | 5.54E-01        | 1.27E-01        | 2.37E-01        | 1.56E-01        | 3.80E-01        | <b>2.45E-05</b> | <b>2.06E-04</b> | 8.78E-01        | 8.36E-01        | <b>1.72E-02</b> |
| rs7385520       | SEMA3D-AC073958.2             | 5.14E-01        | 2.81E-01        | 2.29E-01        | 3.30E-01        | 1.74E-01        | 5.69E-01        | <b>9.75E-06</b> | <b>2.07E-05</b> | 8.42E-01        | 7.84E-01        | <b>1.57E-02</b> |
| rs7385554       | SEMA3D-AC073958.2             | 3.19E-01        | 2.06E-01        | 1.64E-01        | 2.34E-01        | 8.46E-02        | 3.45E-01        | <b>7.81E-06</b> | <b>3.61E-05</b> | 7.91E-01        | 9.07E-01        | <b>2.56E-02</b> |
| rs4333515       | SEMA3D-AC073958.2             | 9.89E-01        | 8.91E-01        | 1.02E-01        | 1.98E-01        | 2.17E-01        | 4.96E-01        | <b>2.28E-05</b> | <b>1.23E-04</b> | 9.97E-01        | 7.34E-01        | <b>1.84E-02</b> |
| rs4275151       | SEMA3D-AC073958.2             | 7.86E-01        | 5.00E-01        | 7.99E-02        | 1.43E-01        | 3.12E-01        | 8.90E-01        | <b>5.13E-05</b> | <b>1.69E-04</b> | 8.99E-01        | 7.99E-01        | <b>2.57E-02</b> |
| rs4560724       | SEMA3D-AC073958.2             | 8.71E-01        | 8.19E-01        | 2.28E-01        | 3.43E-01        | 7.21E-01        | 4.49E-01        | <b>1.36E-05</b> | <b>1.61E-04</b> | <b>4.36E-02</b> | <b>4.97E-02</b> | <b>3.14E-02</b> |
| rs2564780       | SEMA3D-AC073958.2             | 3.36E-01        | 1.96E-01        | 1.33E-01        | 2.44E-01        | 7.46E-02        | 1.73E-01        | <b>5.64E-05</b> | <b>4.65E-04</b> | 8.34E-01        | 8.82E-01        | <b>2.86E-02</b> |
| rs2696173       | SEMA3D-AC073958.2             | 8.32E-01        | 5.51E-01        | 1.13E-01        | 2.18E-01        | 1.54E-01        | 3.63E-01        | <b>2.45E-05</b> | <b>2.06E-04</b> | 8.81E-01        | 8.34E-01        | <b>1.72E-02</b> |
| rs2696174       | SEMA3D-AC073958.2             | 8.23E-01        | 5.45E-01        | 1.13E-01        | 2.19E-01        | 1.52E-01        | 3.55E-01        | <b>2.45E-05</b> | <b>2.06E-04</b> | 8.22E-01        | 8.53E-01        | <b>1.69E-02</b> |
| rs1540847       | SEMA3D-AC073958.2             | 9.91E-01        | 7.65E-01        | 1.93E-01        | 3.59E-01        | 6.90E-01        | 4.52E-01        | <b>1.86E-05</b> | <b>1.70E-04</b> | <b>3.32E-02</b> | <b>3.29E-02</b> | <b>2.59E-02</b> |
| rs1835285       | SEMA3D-AC073958.2             | 8.10E-01        | 5.37E-01        | 1.15E-01        | 2.24E-01        | 1.65E-01        | 3.87E-01        | <b>2.56E-05</b> | <b>2.08E-04</b> | 8.52E-01        | 8.39E-01        | <b>1.66E-02</b> |
| rs7455090       | SEMA3D-AC073958.2             | 8.44E-01        | 6.86E-01        | 1.78E-01        | 3.44E-01        | 5.94E-01        | 3.29E-01        | <b>1.64E-05</b> | <b>1.53E-04</b> | 5.63E-02        | 5.67E-02        | <b>2.87E-02</b> |
| rs10265865      | SEMA3D-AC073958.2             | 9.65E-01        | 7.82E-01        | 1.81E-01        | 3.44E-01        | 7.48E-01        | 5.04E-01        | <b>9.96E-06</b> | <b>1.03E-04</b> | <b>3.52E-02</b> | <b>3.54E-02</b> | <b>2.65E-02</b> |
| rs1429748       | SEMA3D-AC073958.2             | 9.92E-01        | 7.66E-01        | 2.02E-01        | 3.73E-01        | 7.48E-01        | 5.00E-01        | <b>1.69E-05</b> | <b>1.61E-04</b> | <b>3.61E-02</b> | <b>3.52E-02</b> | <b>2.73E-02</b> |
| rs7788690       | SEMA3D-AC073958.2             | 9.33E-01        | 8.64E-01        | 2.03E-01        | 3.06E-01        | 8.50E-01        | 4.77E-01        | <b>1.93E-05</b> | <b>1.84E-03</b> | <b>4.20E-02</b> | <b>4.22E-02</b> | <b>3.13E-02</b> |
| rs2033294       | SEMA3D-AC073958.2             | 9.13E-01        | 8.68E-01        | 1.86E-01        | 3.35E-01        | 1.35E-01        | 2.36E-01        | <b>1.91E-05</b> | <b>1.82E-04</b> | 5.99E-01        | 8.05E-01        | <b>1.68E-02</b> |
| rs2033295       | SEMA3D-AC073958.2             | 8.32E-01        | 9.78E-01        | 1.37E-01        | 2.06E-01        | 3.49E-01        | 5.55E-01        | <b>2.47E-05</b> | <b>2.34E-03</b> | 9.87E-01        | 7.12E-01        | <b>1.89E-02</b> |
| rs2888404       | SEMA3D-AC073958.2             | 7.98E-01        | 9.80E-01        | 1.43E-01        | 2.78E-01        | 2.10E-01        | 3.46E-01        | <b>2.07E-05</b> | <b>2.11E-04</b> | 9.45E-01        | 7.97E-01        | <b>1.65E-02</b> |
| rs7805482       | SEMA3D-AC073958.2             | 6.80E-01        | 9.08E-01        | 1.51E-01        | 2.24E-01        | 4.38E-01        | 6.83E-01        | <b>2.43E-05</b> | <b>2.34E-03</b> | 6.45E-01        | 4.37E-01        | <b>1.83E-02</b> |
| rs6950763       | SEMA3D-AC073958.2             | 8.66E-01        | 9.15E-01        | 1.34E-01        | 2.64E-01        | 2.29E-01        | 3.70E-01        | <b>1.29E-05</b> | <b>1.49E-04</b> | 8.87E-01        | 6.60E-01        | <b>1.59E-02</b> |
| rs12536813      | SEMA3D-AC073958.2             | 2.00E-01        | 5.64E-02        | 4.60E-01        | 5.96E-01        | 1.22E-01        | 2.12E-01        | <b>2.56E-06</b> | <b>9.53E-05</b> | <b>3.33E-02</b> | 6.01E-02        | 1.02E-01        |
| rs10270393      | SEMA3D-AC073958.2             | 5.99E-01        | 9.32E-01        | 1.80E-01        | 2.67E-01        | 4.96E-01        | 7.17E-01        | <b>1.95E-05</b> | <b>1.94E-03</b> | 8.27E-01        | 5.64E-01        | <b>1.93E-02</b> |
| rs6964515       | SEMA3D-AC073958.2             | 6.91E-01        | 9.64E-01        | 1.78E-01        | 2.64E-01        | 6.58E-01        | 9.51E-01        | <b>3.25E-05</b> | <b>2.24E-03</b> | 7.70E-01        | 5.95E-01        | <b>1.50E-02</b> |
| rs78596049      | RP11-682N22.1,SHFM1           | NA              | NA              | NA              | NA              | <b>2.77E-02</b> | <b>2.21E-02</b> | NA              | NA              | <b>1.87E-05</b> | <b>1.16E-04</b> | NA              |

|                  |                                  |                 |                 |                 |                 |                 |                 |                 |                 |                 |                 |                 |
|------------------|----------------------------------|-----------------|-----------------|-----------------|-----------------|-----------------|-----------------|-----------------|-----------------|-----------------|-----------------|-----------------|
| rs77837076       | CTTNBP2                          | NA              | NA              | 9.51E-01        | 8.54E-01        | NA              | NA              | <b>1.42E-03</b> | 5.62E-02        | NA              | NA              | <b>2.61E-06</b> |
| rs34937939       | C007568.1,AC007568.1-AC003084    | 1.40E-01        | 8.25E-01        | 9.54E-01        | 8.06E-01        | 6.01E-01        | 6.16E-01        | <b>7.58E-04</b> | <b>2.99E-02</b> | 7.16E-02        | 5.31E-01        | <b>4.34E-06</b> |
| rs34065982       | AC007568.1-AC003084.2            | 5.40E-01        | 7.63E-01        | 9.96E-01        | 8.69E-01        | NA              | NA              | <b>4.03E-04</b> | <b>2.53E-02</b> | 8.17E-02        | 2.53E-01        | <b>2.66E-05</b> |
| chr7:127381495:1 | SND1                             | 1.28E-01        | 8.76E-02        | 8.11E-02        | 5.47E-02        | 1.95E-01        | 4.33E-01        | <b>3.48E-02</b> | 2.65E-01        | <b>1.32E-10</b> | <b>4.65E-07</b> | 1.31E-01        |
| rs79925690       | RP4-669B10.3,OR2F1,RP4-669B10.   | <b>3.98E-03</b> | <b>1.96E-02</b> | <b>9.57E-03</b> | <b>6.32E-03</b> | <b>6.24E-03</b> | <b>1.48E-03</b> | 2.08E-01        | 5.67E-01        | NA              | NA              | 6.45E-01        |
| rs7832545        | CSMD1                            | 5.97E-01        | 8.31E-01        | 6.02E-01        | 8.75E-01        | NA              | NA              | <b>3.61E-10</b> | <b>3.02E-07</b> | <b>5.64E-04</b> | <b>6.25E-03</b> | <b>6.83E-03</b> |
| rs77378271       | CSMD1                            | 4.17E-01        | 2.82E-01        | 7.85E-01        | 9.58E-01        | 4.86E-01        | 8.27E-01        | <b>5.30E-10</b> | <b>6.69E-07</b> | <b>4.46E-04</b> | <b>2.38E-03</b> | <b>5.07E-03</b> |
| rs75721860       | CSMD1                            | 3.82E-01        | 2.56E-01        | 8.26E-01        | 9.67E-01        | NA              | NA              | <b>2.75E-09</b> | <b>1.69E-06</b> | <b>2.57E-04</b> | <b>2.07E-03</b> | <b>5.49E-03</b> |
| rs7836257        | RP11-149P24.1-RP11-431D12.1      | NA              | NA              | NA              | NA              | 9.89E-02        | 5.41E-02        | NA              | NA              | <b>2.04E-08</b> | <b>1.52E-03</b> | NA              |
| rs902820         | RP11-953B20.2-RP11-953B20.1      | <b>4.30E-03</b> | <b>6.11E-03</b> | <b>4.75E-04</b> | <b>2.16E-03</b> | 1.34E-01        | 4.37E-01        | <b>3.75E-02</b> | 5.22E-02        | 8.83E-01        | 7.74E-01        | 6.41E-01        |
| rs192069564      | C9orf92                          | 1.22E-01        | 1.12E-01        | <b>9.76E-06</b> | <b>1.25E-04</b> | 7.52E-01        | 8.14E-01        | <b>3.72E-02</b> | 1.45E-01        | 2.08E-01        | 2.48E-01        | 8.85E-01        |
| rs77322165       | RP11-373A6.1-RP11-48L13.1        | NA              | NA              | <b>1.38E-02</b> | <b>1.30E-02</b> | NA              | NA              | <b>6.76E-04</b> | NA              | 1.04E-01        | 1.12E-01        | <b>2.41E-02</b> |
| rs10969090       | RP11-373A6.1-RP11-48L13.1        | NA              | NA              | <b>1.39E-02</b> | <b>1.29E-02</b> | NA              | NA              | <b>6.34E-04</b> | NA              | 1.02E-01        | 1.09E-01        | <b>2.41E-02</b> |
| rs78011063       | RP11-373A6.1-RP11-48L13.1        | NA              | NA              | <b>1.44E-02</b> | <b>1.30E-02</b> | NA              | NA              | <b>5.50E-04</b> | NA              | 9.68E-02        | 1.00E-01        | <b>2.41E-02</b> |
| rs75849759       | RP11-373A6.1-RP11-48L13.1        | NA              | NA              | <b>1.51E-02</b> | <b>1.24E-02</b> | NA              | NA              | <b>4.09E-05</b> | NA              | 7.48E-02        | 7.61E-02        | <b>3.59E-02</b> |
| rs10969106       | RP11-373A6.1-RP11-48L13.1        | NA              | NA              | <b>2.15E-02</b> | <b>1.64E-02</b> | NA              | NA              | <b>2.24E-05</b> | <b>9.96E-03</b> | NA              | NA              | <b>2.85E-02</b> |
| rs80128289       | RP11-373A6.1-RP11-48L13.1        | NA              | NA              | <b>1.85E-02</b> | <b>1.54E-02</b> | NA              | NA              | <b>3.98E-05</b> | <b>1.40E-02</b> | 7.32E-02        | 7.61E-02        | <b>3.69E-02</b> |
| rs8181059        | RP11-373A6.1-RP11-48L13.1        | NA              | NA              | <b>3.37E-02</b> | <b>2.72E-02</b> | NA              | NA              | <b>2.19E-05</b> | <b>1.22E-02</b> | 6.78E-02        | 7.54E-02        | <b>4.25E-02</b> |
| rs118089179      | RP11-373A6.1-RP11-48L13.1        | NA              | NA              | 2.63E-01        | 2.57E-01        | 5.67E-02        | 1.05E-01        | <b>8.01E-06</b> | <b>1.25E-02</b> | 8.53E-01        | 7.51E-01        | 4.79E-01        |
| rs10869996       | GNAQ,GNAQ,GNAQ                   | <b>4.99E-03</b> | <b>1.75E-03</b> | 2.25E-01        | 1.61E-01        | <b>1.44E-02</b> | <b>3.10E-02</b> | 7.93E-01        | 7.97E-01        | <b>4.77E-03</b> | <b>2.05E-02</b> | 1.65E-01        |
| rs10781482       | GNAQ-RP11-336N8.1                | <b>5.54E-04</b> | <b>4.66E-04</b> | 4.80E-01        | 3.36E-01        | <b>2.58E-02</b> | <b>2.96E-02</b> | 9.76E-01        | 9.55E-01        | 6.36E-02        | 2.20E-01        | 1.65E-01        |
| rs10781489       | GNAQ-RP11-336N8.1                | <b>5.40E-04</b> | <b>4.63E-04</b> | 4.80E-01        | 3.37E-01        | <b>2.59E-02</b> | <b>2.96E-02</b> | 9.67E-01        | 9.47E-01        | 6.30E-02        | 2.19E-01        | 1.64E-01        |
| rs7853028        | PSMB7                            | 4.12E-01        | 7.08E-01        | NA              | NA              | <b>8.94E-09</b> | <b>8.86E-06</b> | NA              | NA              | 7.50E-01        | 6.99E-01        | NA              |
| rs7081023        | RP11-554I8.1-RP11-554I8.2        | 2.31E-01        | 3.25E-01        | <b>2.68E-04</b> | <b>6.29E-03</b> | 4.02E-01        | 9.44E-01        | 9.35E-02        | 1.29E-01        | 5.98E-01        | 3.05E-01        | <b>6.55E-03</b> |
| rs2399788        | NUDT5,CDC123                     | <b>1.70E-03</b> | <b>3.67E-04</b> | 1.46E-01        | 2.73E-01        | 2.99E-01        | 3.34E-01        | <b>2.10E-03</b> | <b>3.90E-02</b> | 3.93E-01        | 8.07E-01        | 3.19E-01        |
| rs115881020      | GLUDP5-RP11-472N13.3             | <b>3.32E-03</b> | <b>1.98E-03</b> | NA              | NA              | <b>1.14E-04</b> | <b>3.54E-04</b> | NA              | NA              | <b>2.65E-02</b> | 3.08E-01        | NA              |
| rs114400896      | GLUDP5-RP11-472N13.3             | <b>3.34E-03</b> | <b>2.29E-03</b> | NA              | NA              | <b>1.15E-04</b> | <b>3.59E-04</b> | NA              | NA              | <b>2.63E-02</b> | 3.10E-01        | NA              |
| rs115553536      | L1-472N13.3,GLUDP5-RP11-472N13.3 | <b>8.69E-03</b> | <b>2.26E-03</b> | NA              | NA              | <b>1.34E-04</b> | <b>2.19E-04</b> | NA              | NA              | <b>7.34E-04</b> | <b>1.05E-02</b> | NA              |
| rs116449238      | RP11-472N13.3                    | <b>1.85E-02</b> | <b>5.42E-03</b> | NA              | NA              | <b>1.93E-04</b> | <b>3.48E-04</b> | NA              | NA              | <b>2.74E-03</b> | <b>4.83E-02</b> | NA              |
| rs9888015        | RP11-472N13.3                    | <b>3.31E-02</b> | <b>9.84E-03</b> | NA              | NA              | <b>2.13E-04</b> | <b>3.82E-04</b> | NA              | NA              | <b>3.12E-03</b> | 5.55E-02        | NA              |
| rs76942454       | MIR5100-RET                      | NA              | NA              | <b>5.65E-05</b> | <b>3.19E-05</b> | NA              | NA              | <b>6.11E-04</b> | <b>1.36E-03</b> | NA              | NA              | 1.58E-01        |
| rs74361869       | MIR5100-RET                      | NA              | NA              | <b>4.14E-05</b> | <b>1.85E-05</b> | NA              | NA              | <b>8.33E-04</b> | <b>2.06E-03</b> | NA              | NA              | 5.30E-01        |
| rs75381638       | MIR5100-RET                      | NA              | NA              | <b>4.25E-05</b> | <b>1.89E-05</b> | NA              | NA              | <b>8.17E-04</b> | <b>2.04E-03</b> | NA              | NA              | 5.30E-01        |
| rs3026705        | MIR5100-RET                      | NA              | NA              | <b>4.92E-05</b> | <b>2.09E-05</b> | NA              | NA              | <b>7.51E-04</b> | <b>2.00E-03</b> | NA              | NA              | 5.27E-01        |
| rs3026713        | MIR5100-RET                      | NA              | NA              | <b>6.54E-05</b> | <b>2.75E-05</b> | NA              | NA              | <b>5.89E-04</b> | <b>1.91E-03</b> | NA              | NA              | 5.28E-01        |
| rs3026721        | MIR5100-RET                      | NA              | NA              | <b>5.32E-05</b> | <b>6.84E-05</b> | NA              | NA              | <b>1.15E-03</b> | <b>5.07E-03</b> | NA              | NA              | 5.50E-01        |
| rs80080342       | RET,MIR5100-RET                  | NA              | NA              | <b>8.63E-05</b> | <b>1.25E-04</b> | NA              | NA              | <b>9.98E-04</b> | <b>4.71E-03</b> | NA              | NA              | 6.00E-01        |
| rs74865054       | RET                              | NA              | NA              | <b>7.91E-05</b> | <b>1.09E-04</b> | NA              | NA              | <b>9.94E-04</b> | <b>4.28E-03</b> | NA              | NA              | 5.76E-01        |
| rs77154599       | RET                              | NA              | NA              | <b>8.81E-05</b> | <b>1.25E-04</b> | NA              | NA              | <b>1.01E-03</b> | <b>4.62E-03</b> | NA              | NA              | 5.92E-01        |
| rs74438020       | RET                              | NA              | NA              | <b>9.69E-05</b> | <b>1.35E-04</b> | NA              | NA              | <b>9.84E-04</b> | <b>4.13E-03</b> | NA              | NA              | 6.05E-01        |
| chr10:43579081:D | RET                              | NA              | NA              | <b>9.72E-05</b> | <b>1.35E-04</b> | NA              | NA              | <b>9.84E-04</b> | <b>4.11E-03</b> | NA              | NA              | 6.05E-01        |
| rs77776459       | RET                              | NA              | NA              | <b>1.02E-04</b> | <b>1.41E-04</b> | NA              | NA              | <b>9.84E-04</b> | <b>3.96E-03</b> | NA              | NA              | 6.10E-01        |
| rs76568066       | RET                              | NA              | NA              | <b>1.88E-04</b> | <b>3.46E-04</b> | NA              | NA              | <b>7.01E-04</b> | <b>2.36E-03</b> | NA              | NA              | 6.73E-01        |
| rs76837320       | RET                              | NA              | NA              | <b>1.93E-04</b> | <b>3.53E-04</b> | NA              | NA              | <b>5.23E-04</b> | <b>1.69E-03</b> | NA              | NA              | 6.77E-01        |
| rs74400468       | RET                              | 4.40E-01        | 1.77E-01        | <b>1.17E-04</b> | <b>2.86E-04</b> | 8.25E-01        | 4.88E-01        | <b>3.02E-04</b> | <b>9.01E-04</b> | <b>1.19E-02</b> | <b>2.68E-02</b> | 8.53E-01        |
| rs142883467      | RET                              | NA              | NA              | <b>1.85E-04</b> | <b>3.09E-04</b> | NA              | NA              | <b>2.59E-04</b> | <b>7.62E-04</b> | NA              | NA              | 6.98E-01        |

|                  |                         |                 |                 |                 |                 |                 |                 |                 |                 |                 |                 |                 |
|------------------|-------------------------|-----------------|-----------------|-----------------|-----------------|-----------------|-----------------|-----------------|-----------------|-----------------|-----------------|-----------------|
| rs11238474       | RASGEF1A                | NA              | NA              | <b>9.05E-04</b> | <b>1.96E-03</b> | <b>4.91E-02</b> | <b>1.80E-02</b> | <b>2.28E-03</b> | <b>2.57E-04</b> | <b>2.91E-02</b> | 8.03E-02        | 9.23E-01        |
| rs10762724       | C10orf11                | <b>6.54E-04</b> | <b>1.08E-02</b> | 5.05E-01        | 7.61E-01        | 5.29E-02        | <b>2.38E-02</b> | <b>1.99E-02</b> | <b>3.07E-02</b> | 1.85E-01        | 1.12E-01        | 6.75E-01        |
| rs146091982      | SLC35G1,SLC35G1,SLC35G1 | <b>1.59E-02</b> | 8.51E-02        | NA              | NA              | <b>5.82E-05</b> | <b>1.53E-03</b> | NA              | NA              | 1.21E-01        | 1.70E-01        | NA              |
| chr10:95669221:D | SLC35G1                 | <b>1.46E-02</b> | 6.38E-02        | NA              | NA              | <b>4.81E-04</b> | <b>1.10E-02</b> | NA              | NA              | <b>3.34E-02</b> | 5.58E-02        | NA              |
| rs115058152      | ENTPD1                  | 1.38E-01        | 7.39E-02        | 1.09E-01        | 7.17E-02        | <b>1.77E-06</b> | <b>1.26E-04</b> | <b>2.82E-02</b> | <b>2.73E-02</b> | 2.70E-01        | 1.68E-01        | 2.05E-01        |
| rs11575631       | HABP2                   | <b>2.51E-02</b> | 6.88E-02        | 3.92E-01        | 1.62E-01        | <b>1.26E-06</b> | <b>3.32E-06</b> | 3.52E-01        | 4.29E-01        | 4.58E-01        | 5.37E-01        | <b>1.63E-02</b> |
| rs11575634       | HABP2                   | <b>3.29E-02</b> | 8.12E-02        | 4.03E-01        | 1.72E-01        | <b>1.05E-06</b> | <b>2.82E-06</b> | 3.52E-01        | 4.29E-01        | 4.79E-01        | 5.73E-01        | <b>1.65E-02</b> |
| rs4643011        | HABP2                   | <b>3.09E-02</b> | 7.32E-02        | 4.19E-01        | 1.98E-01        | <b>7.21E-07</b> | <b>2.21E-06</b> | 3.92E-01        | 4.47E-01        | 5.09E-01        | 6.27E-01        | <b>1.35E-02</b> |
| rs73443003       | PRMT3-RP11-701I24.1     | <b>1.66E-04</b> | <b>3.50E-03</b> | NA              | NA              | <b>7.22E-03</b> | <b>1.72E-02</b> | NA              | NA              | <b>1.98E-02</b> | <b>5.43E-03</b> | <b>1.03E-02</b> |
| rs12278342       | CCDC179,RP11-17A1.3     | 6.32E-02        | 7.11E-01        | <b>3.23E-03</b> | <b>6.30E-03</b> | 3.00E-01        | 5.75E-01        | <b>2.49E-03</b> | <b>7.95E-03</b> | 9.11E-01        | 6.06E-01        | 8.52E-02        |
| chr11:22884459:D | CCDC179,RP11-17A1.3     | 5.69E-02        | 6.78E-01        | <b>3.23E-03</b> | <b>6.30E-03</b> | 3.07E-01        | 5.87E-01        | <b>2.37E-03</b> | <b>7.51E-03</b> | 9.10E-01        | 6.04E-01        | 8.23E-02        |
| rs12293401       | CCDC179,RP11-17A1.3     | 1.64E-01        | 7.98E-01        | <b>1.59E-03</b> | <b>5.44E-03</b> | 8.62E-01        | 7.00E-01        | <b>3.15E-03</b> | <b>1.08E-02</b> | 2.21E-01        | 2.95E-01        | 1.29E-01        |
| rs12294894       | CCDC179,RP11-17A1.3     | 5.14E-02        | 6.49E-01        | <b>3.22E-03</b> | <b>6.28E-03</b> | 3.14E-01        | 5.97E-01        | <b>2.26E-03</b> | <b>7.11E-03</b> | 9.09E-01        | 6.02E-01        | 7.93E-02        |
| chr11:22885400:D | CCDC179,RP11-17A1.3     | 3.38E-01        | 8.32E-01        | <b>3.49E-03</b> | <b>7.68E-03</b> | 4.34E-01        | 6.22E-01        | <b>2.01E-03</b> | <b>6.82E-03</b> | 9.32E-01        | 7.02E-01        | 6.92E-02        |
| rs72865358       | CCDC179,RP11-17A1.3     | 1.61E-01        | 7.96E-01        | <b>1.59E-03</b> | <b>5.43E-03</b> | 7.50E-01        | 6.25E-01        | <b>3.12E-03</b> | <b>1.07E-02</b> | 2.22E-01        | 2.97E-01        | 1.28E-01        |
| rs4540836        | CCDC179,RP11-17A1.3     | 2.08E-01        | 9.69E-01        | <b>8.48E-04</b> | <b>3.23E-03</b> | 9.82E-01        | 7.75E-01        | <b>4.88E-03</b> | <b>1.67E-02</b> | 2.40E-01        | 2.45E-01        | 1.32E-01        |
| rs4459305        | CCDC179,RP11-17A1.3     | 2.02E-01        | 9.87E-01        | <b>7.24E-04</b> | <b>2.84E-03</b> | 9.63E-01        | 7.82E-01        | <b>4.87E-03</b> | <b>1.67E-02</b> | 2.85E-01        | 2.76E-01        | 1.77E-01        |
| rs4427562        | CCDC179,RP11-17A1.3     | 2.26E-01        | 9.55E-01        | <b>5.93E-04</b> | <b>2.55E-03</b> | 9.63E-01        | 8.16E-01        | <b>4.93E-03</b> | <b>1.66E-02</b> | 2.33E-01        | 2.19E-01        | 1.78E-01        |
| rs7946163        | RP11-17A1.3             | 1.75E-01        | 8.74E-01        | <b>1.58E-03</b> | <b>5.40E-03</b> | 7.90E-01        | 6.01E-01        | <b>3.09E-03</b> | <b>1.06E-02</b> | 2.32E-01        | 2.73E-01        | 1.25E-01        |
| rs12275725       | RP11-17A1.3             | 2.32E-01        | 9.13E-01        | <b>7.91E-04</b> | <b>3.05E-03</b> | 9.76E-01        | 7.37E-01        | <b>4.84E-03</b> | <b>1.65E-02</b> | 2.52E-01        | 2.26E-01        | 1.72E-01        |
| rs4922632        | RP11-17A1.3             | 2.63E-01        | 8.39E-01        | <b>7.80E-04</b> | <b>2.99E-03</b> | 9.85E-01        | 7.48E-01        | <b>4.79E-03</b> | <b>1.58E-02</b> | 2.66E-01        | 2.41E-01        | 1.70E-01        |
| rs61889513       | RP11-17A1.3             | 5.02E-02        | 6.36E-01        | <b>3.17E-03</b> | <b>6.15E-03</b> | 3.59E-01        | 6.65E-01        | <b>2.15E-03</b> | <b>6.05E-03</b> | 9.22E-01        | 6.03E-01        | 7.54E-02        |
| rs12292718       | RP11-17A1.3             | 2.29E-01        | 9.42E-01        | <b>4.50E-04</b> | <b>1.62E-03</b> | 9.65E-01        | 7.37E-01        | <b>4.75E-03</b> | <b>1.67E-02</b> | 2.64E-01        | 2.40E-01        | 1.81E-01        |
| rs12292974       | RP11-17A1.3             | 1.56E-01        | 8.26E-01        | <b>1.36E-03</b> | <b>4.42E-03</b> | 8.99E-01        | 7.65E-01        | <b>4.65E-03</b> | <b>1.39E-02</b> | 1.74E-01        | 1.78E-01        | 1.07E-01        |
| rs4384387        | RP11-17A1.3             | 2.70E-01        | 9.35E-01        | <b>5.21E-04</b> | <b>1.47E-03</b> | 8.97E-01        | 8.04E-01        | <b>3.81E-03</b> | <b>1.02E-02</b> | 2.27E-01        | 2.13E-01        | 1.45E-01        |
| rs4244495        | RP11-17A1.3             | 2.12E-01        | 9.08E-01        | <b>2.88E-04</b> | <b>8.93E-04</b> | 7.86E-01        | 9.21E-01        | <b>3.56E-03</b> | <b>8.84E-03</b> | 2.77E-01        | 2.34E-01        | 1.49E-01        |
| rs4923035        | RP11-17A1.3             | 2.70E-01        | 9.35E-01        | <b>5.19E-04</b> | <b>1.47E-03</b> | 8.87E-01        | 8.27E-01        | <b>3.77E-03</b> | <b>1.01E-02</b> | 2.27E-01        | 2.14E-01        | 1.44E-01        |
| rs4486627        | RP11-17A1.3             | 1.65E-01        | 8.41E-01        | <b>9.82E-04</b> | <b>2.40E-03</b> | 8.69E-01        | 8.43E-01        | <b>3.81E-03</b> | <b>1.01E-02</b> | 1.65E-01        | 1.67E-01        | 9.90E-02        |
| rs4495893        | RP11-17A1.3             | 1.65E-01        | 8.39E-01        | <b>9.79E-04</b> | <b>2.39E-03</b> | 8.69E-01        | 8.43E-01        | <b>3.81E-03</b> | <b>1.01E-02</b> | 1.65E-01        | 1.68E-01        | 9.86E-02        |
| rs4255538        | RP11-17A1.3             | 1.65E-01        | 8.39E-01        | <b>9.79E-04</b> | <b>2.39E-03</b> | 8.69E-01        | 8.43E-01        | <b>3.81E-03</b> | <b>1.01E-02</b> | 1.66E-01        | 1.68E-01        | 9.86E-02        |
| rs4466830        | RP11-17A1.3             | 1.79E-01        | 9.04E-01        | <b>7.33E-04</b> | <b>1.83E-03</b> | 8.78E-01        | 7.81E-01        | <b>3.80E-03</b> | <b>1.01E-02</b> | 1.92E-01        | 1.76E-01        | 1.05E-01        |
| chr11:22894411:D | RP11-17A1.3             | 1.65E-01        | 8.36E-01        | <b>9.67E-04</b> | <b>2.35E-03</b> | 8.70E-01        | 8.42E-01        | <b>3.81E-03</b> | <b>1.01E-02</b> | 1.67E-01        | 1.70E-01        | 9.72E-02        |
| rs12284580       | RP11-17A1.3             | 1.75E-01        | 8.74E-01        | <b>7.58E-04</b> | <b>1.86E-03</b> | 9.43E-01        | 7.36E-01        | <b>3.81E-03</b> | <b>1.01E-02</b> | 1.86E-01        | 1.61E-01        | 9.40E-02        |
| rs12277600       | RP11-17A1.3             | 1.63E-01        | 8.24E-01        | <b>9.30E-04</b> | <b>2.23E-03</b> | 8.72E-01        | 8.38E-01        | <b>4.19E-03</b> | <b>1.00E-02</b> | 1.72E-01        | 1.77E-01        | 9.24E-02        |
| rs9783311        | RP11-17A1.3             | 1.69E-01        | 8.61E-01        | <b>1.31E-03</b> | <b>2.86E-03</b> | 9.51E-01        | 7.48E-01        | <b>2.40E-03</b> | <b>9.74E-03</b> | 1.82E-01        | 1.60E-01        | 1.18E-01        |
| rs9783404        | RP11-17A1.3             | 2.09E-01        | 9.23E-01        | <b>6.08E-04</b> | <b>1.32E-03</b> | 7.87E-01        | 9.36E-01        | <b>3.55E-03</b> | <b>9.59E-03</b> | 2.54E-01        | 2.58E-01        | 1.28E-01        |
| rs12284600       | RP11-17A1.3             | 2.51E-01        | 7.63E-01        | <b>8.98E-04</b> | <b>1.77E-03</b> | 5.21E-01        | 2.96E-01        | <b>3.87E-03</b> | <b>9.45E-03</b> | 2.93E-01        | 3.59E-01        | 7.12E-02        |
| rs12284602       | RP11-17A1.3             | 2.34E-01        | 8.81E-01        | <b>7.72E-04</b> | <b>1.58E-03</b> | 9.70E-01        | 7.36E-01        | <b>3.88E-03</b> | <b>9.46E-03</b> | 2.56E-01        | 2.96E-01        | 6.99E-02        |
| chr11:22898264:I | RP11-17A1.3             | 4.10E-01        | 8.26E-01        | <b>2.26E-04</b> | <b>4.60E-04</b> | 9.51E-01        | 8.05E-01        | <b>1.12E-02</b> | <b>2.38E-02</b> | 3.14E-01        | 3.05E-01        | 7.06E-02        |
| rs10488701       | RP11-17A1.3             | 1.28E-01        | 9.33E-01        | <b>3.17E-03</b> | <b>5.58E-03</b> | 4.43E-01        | 7.24E-01        | <b>1.97E-03</b> | <b>5.18E-03</b> | 9.92E-01        | 6.05E-01        | 5.54E-02        |
| rs2429779        | RP11-17A1.3             | 2.83E-01        | 9.81E-01        | <b>7.23E-04</b> | <b>1.47E-03</b> | 9.65E-01        | 7.77E-01        | <b>3.43E-03</b> | <b>8.98E-03</b> | 2.02E-01        | 2.65E-01        | 7.00E-02        |
| rs11026825       | RP11-17A1.3             | 2.79E-01        | 9.60E-01        | <b>7.67E-04</b> | <b>1.71E-03</b> | 9.97E-01        | 7.69E-01        | <b>7.06E-03</b> | <b>1.34E-02</b> | 2.32E-01        | 2.95E-01        | 9.07E-02        |
| rs12290230       | RP11-17A1.3             | 2.26E-01        | 9.61E-01        | <b>7.73E-04</b> | <b>1.58E-03</b> | 9.85E-01        | 6.94E-01        | <b>3.87E-03</b> | <b>9.45E-03</b> | 1.80E-01        | 2.51E-01        | 6.97E-02        |
| rs2403776        | RP11-17A1.3             | 2.94E-01        | 9.91E-01        | <b>7.73E-04</b> | <b>1.58E-03</b> | 9.68E-01        | 7.75E-01        | <b>3.89E-03</b> | <b>9.48E-03</b> | 2.05E-01        | 2.69E-01        | 6.97E-02        |
| rs2429777        | RP11-17A1.3             | 2.94E-01        | 9.91E-01        | <b>7.73E-04</b> | <b>1.58E-03</b> | 9.67E-01        | 7.77E-01        | <b>3.87E-03</b> | <b>9.47E-03</b> | 2.05E-01        | 2.69E-01        | 6.97E-02        |
| rs2253956        | RP11-17A1.3             | 2.94E-01        | 9.91E-01        | <b>7.73E-04</b> | <b>1.58E-03</b> | 9.68E-01        | 7.75E-01        | <b>3.89E-03</b> | <b>9.48E-03</b> | 2.05E-01        | 2.69E-01        | 6.97E-02        |

|                  |                            |                 |                 |                 |                 |                 |          |                 |                 |                 |                 |                 |
|------------------|----------------------------|-----------------|-----------------|-----------------|-----------------|-----------------|----------|-----------------|-----------------|-----------------|-----------------|-----------------|
| rs2429776        | RP11-17A1.3                | 2.95E-01        | 9.96E-01        | <b>6.20E-04</b> | <b>1.30E-03</b> | 9.59E-01        | 7.77E-01 | <b>3.90E-03</b> | <b>9.42E-03</b> | 1.95E-01        | 2.28E-01        | 7.31E-02        |
| rs2429775        | RP11-17A1.3                | 2.18E-01        | 8.47E-01        | <b>1.85E-04</b> | <b>3.16E-04</b> | 9.27E-01        | 8.39E-01 | <b>3.26E-02</b> | <b>2.03E-02</b> | 2.05E-01        | 2.50E-01        | <b>3.21E-02</b> |
| rs2429774        | RP11-17A1.3                | 1.34E-01        | 9.21E-01        | <b>3.17E-03</b> | <b>5.59E-03</b> | 4.06E-01        | 7.23E-01 | <b>2.05E-03</b> | <b>5.18E-03</b> | 9.87E-01        | 5.69E-01        | 5.45E-02        |
| rs2470329        | RP11-17A1.3                | 3.48E-01        | 8.95E-01        | <b>4.70E-04</b> | <b>9.36E-04</b> | 9.19E-01        | 8.20E-01 | <b>4.02E-03</b> | <b>9.44E-03</b> | 3.12E-01        | 3.67E-01        | 1.02E-01        |
| chr11:22903503:I | RP11-17A1.3                | 3.09E-01        | 9.74E-01        | <b>7.18E-04</b> | <b>1.49E-03</b> | 9.83E-01        | 7.57E-01 | <b>7.51E-03</b> | <b>1.70E-02</b> | 2.05E-01        | 2.68E-01        | 7.09E-02        |
| rs2429773        | RP11-17A1.3                | 3.11E-01        | 9.57E-01        | <b>5.94E-04</b> | <b>1.18E-03</b> | 9.09E-01        | 6.80E-01 | <b>5.87E-03</b> | <b>1.48E-02</b> | 2.13E-01        | 2.84E-01        | 7.36E-02        |
| rs4296039        | RP11-17A1.3                | 3.03E-01        | 9.78E-01        | <b>7.94E-04</b> | <b>1.63E-03</b> | 9.90E-01        | 7.46E-01 | <b>4.16E-03</b> | <b>9.58E-03</b> | 2.05E-01        | 2.68E-01        | 6.97E-02        |
| rs4543991        | RP11-17A1.3                | 3.04E-01        | 9.77E-01        | <b>8.13E-04</b> | <b>1.67E-03</b> | 9.93E-01        | 7.41E-01 | <b>4.22E-03</b> | <b>9.60E-03</b> | 2.06E-01        | 2.68E-01        | 6.97E-02        |
| rs2470309        | RP11-17A1.3                | 3.12E-01        | 9.64E-01        | <b>7.52E-04</b> | <b>1.59E-03</b> | 9.66E-01        | 8.37E-01 | <b>4.23E-03</b> | <b>9.61E-03</b> | 2.09E-01        | 2.65E-01        | 6.97E-02        |
| rs2470308        | RP11-17A1.3                | 1.38E-01        | 9.31E-01        | <b>3.33E-03</b> | <b>5.86E-03</b> | 4.09E-01        | 7.33E-01 | <b>2.14E-03</b> | <b>5.20E-03</b> | 9.87E-01        | 5.69E-01        | 5.45E-02        |
| rs2470306        | RP11-17A1.3                | 3.05E-01        | 9.77E-01        | <b>8.40E-04</b> | <b>1.72E-03</b> | 9.99E-01        | 7.34E-01 | <b>4.29E-03</b> | <b>9.64E-03</b> | 2.06E-01        | 2.67E-01        | 6.96E-02        |
| rs2429772        | RP11-17A1.3                | 3.79E-01        | 8.60E-01        | <b>4.53E-04</b> | <b>9.14E-04</b> | 9.55E-01        | 7.61E-01 | <b>4.28E-03</b> | <b>9.54E-03</b> | 3.12E-01        | 3.33E-01        | 1.02E-01        |
| rs2429771        | RP11-17A1.3                | 3.05E-01        | 9.76E-01        | <b>8.54E-04</b> | <b>1.75E-03</b> | 9.99E-01        | 7.30E-01 | <b>4.34E-03</b> | <b>9.65E-03</b> | 2.06E-01        | 2.67E-01        | 6.97E-02        |
| rs2429770        | RP11-17A1.3                | 3.05E-01        | 9.76E-01        | <b>8.58E-04</b> | <b>1.76E-03</b> | 9.98E-01        | 7.29E-01 | <b>4.35E-03</b> | <b>9.66E-03</b> | 2.06E-01        | 2.67E-01        | 6.97E-02        |
| rs2429769        | RP11-17A1.3                | 3.05E-01        | 9.75E-01        | <b>8.63E-04</b> | <b>1.77E-03</b> | 9.97E-01        | 7.28E-01 | <b>4.37E-03</b> | <b>9.66E-03</b> | 2.06E-01        | 2.67E-01        | 6.97E-02        |
| chr11:22907658:D | RP11-17A1.3                | 2.96E-01        | 9.85E-01        | <b>1.37E-03</b> | <b>2.39E-03</b> | 9.77E-01        | 7.38E-01 | <b>3.89E-03</b> | <b>1.07E-02</b> | 2.03E-01        | 2.60E-01        | 7.55E-02        |
| rs2429768        | RP11-17A1.3                | 3.41E-01        | 9.01E-01        | <b>2.12E-04</b> | <b>4.89E-04</b> | 9.69E-01        | 7.25E-01 | <b>1.39E-02</b> | <b>3.18E-02</b> | 3.04E-01        | 3.19E-01        | 1.18E-01        |
| rs2429767        | RP11-17A1.3                | 2.96E-01        | 9.80E-01        | <b>9.09E-04</b> | <b>1.78E-03</b> | 9.92E-01        | 7.21E-01 | <b>4.17E-03</b> | <b>9.38E-03</b> | 2.06E-01        | 2.65E-01        | 7.27E-02        |
| rs2429766        | RP11-17A1.3                | 2.96E-01        | 9.80E-01        | <b>9.19E-04</b> | <b>1.80E-03</b> | 9.90E-01        | 7.18E-01 | <b>4.20E-03</b> | <b>9.40E-03</b> | 2.06E-01        | 2.65E-01        | 7.27E-02        |
| rs2470304        | RP11-17A1.3                | 3.01E-01        | 9.69E-01        | <b>9.29E-04</b> | <b>1.82E-03</b> | 8.83E-01        | 6.45E-01 | <b>4.21E-03</b> | <b>9.39E-03</b> | 2.06E-01        | 2.65E-01        | 7.27E-02        |
| rs2470303        | RP11-17A1.3                | 2.97E-01        | 9.79E-01        | <b>9.30E-04</b> | <b>1.82E-03</b> | 9.88E-01        | 7.16E-01 | <b>4.23E-03</b> | <b>9.41E-03</b> | 2.06E-01        | 2.65E-01        | 7.27E-02        |
| rs2429765        | RP11-17A1.3                | 2.98E-01        | 9.78E-01        | <b>9.59E-04</b> | <b>1.88E-03</b> | 9.83E-01        | 7.10E-01 | <b>4.30E-03</b> | <b>9.44E-03</b> | 2.06E-01        | 2.64E-01        | 7.27E-02        |
| rs2429764        | RP11-17A1.3                | 3.71E-01        | 8.63E-01        | <b>5.22E-04</b> | <b>1.00E-03</b> | 9.74E-01        | 7.37E-01 | <b>4.30E-03</b> | <b>9.36E-03</b> | 3.12E-01        | 3.29E-01        | 1.06E-01        |
| rs2429763        | RP11-17A1.3                | 3.72E-01        | 8.62E-01        | <b>5.33E-04</b> | <b>1.03E-03</b> | 9.76E-01        | 7.33E-01 | <b>4.35E-03</b> | <b>9.38E-03</b> | 3.13E-01        | 3.29E-01        | 1.06E-01        |
| chr11:22910682:I | RP11-17A1.3                | 2.85E-01        | 9.57E-01        | <b>8.38E-04</b> | <b>1.74E-03</b> | 9.90E-01        | 7.07E-01 | <b>4.85E-03</b> | <b>1.18E-02</b> | 1.83E-01        | 2.89E-01        | 5.43E-02        |
| rs2429761        | RP11-17A1.3                | 3.73E-01        | 8.62E-01        | <b>5.52E-04</b> | <b>1.06E-03</b> | 9.81E-01        | 7.27E-01 | <b>4.43E-03</b> | <b>9.42E-03</b> | 3.13E-01        | 3.28E-01        | 1.06E-01        |
| rs983867         | RP11-17A1.3                | 2.99E-01        | 9.78E-01        | <b>1.04E-03</b> | <b>2.02E-03</b> | 9.98E-01        | 7.32E-01 | <b>4.50E-03</b> | <b>9.53E-03</b> | 2.06E-01        | 2.64E-01        | 7.27E-02        |
| rs2429760        | RP11-17A1.3                | 3.02E-01        | 9.74E-01        | <b>1.13E-03</b> | <b>2.20E-03</b> | 8.94E-01        | 6.17E-01 | <b>4.77E-03</b> | <b>9.73E-03</b> | 2.07E-01        | 2.62E-01        | 7.26E-02        |
| rs113236916      | RP11-17A1.3                | 3.02E-01        | 9.74E-01        | <b>1.14E-03</b> | <b>2.22E-03</b> | 9.60E-01        | 6.80E-01 | <b>4.73E-03</b> | <b>9.63E-03</b> | 2.07E-01        | 2.62E-01        | 7.26E-02        |
| rs56892416       | RP11-17A1.3                | 3.07E-01        | 9.70E-01        | <b>1.04E-03</b> | <b>1.98E-03</b> | 9.20E-01        | 6.56E-01 | <b>4.70E-03</b> | <b>9.56E-03</b> | 2.19E-01        | 2.92E-01        | 7.41E-02        |
| rs987866         | RP11-17A1.3                | 3.05E-01        | 9.86E-01        | <b>9.38E-04</b> | <b>1.88E-03</b> | 9.72E-01        | 6.85E-01 | <b>4.70E-03</b> | <b>9.56E-03</b> | 1.98E-01        | 2.22E-01        | 7.57E-02        |
| rs987865         | RP11-17A1.3                | 1.83E-01        | 9.83E-01        | <b>4.59E-03</b> | <b>7.79E-03</b> | 4.05E-01        | 7.52E-01 | <b>2.39E-03</b> | <b>5.10E-03</b> | 9.78E-01        | 5.31E-01        | 5.71E-02        |
| rs2470301        | RP11-17A1.3                | 2.37E-01        | 9.22E-01        | <b>7.73E-04</b> | <b>1.38E-03</b> | 8.63E-01        | 8.78E-01 | <b>4.70E-03</b> | <b>9.56E-03</b> | 2.22E-01        | 3.03E-01        | 7.66E-02        |
| rs2429757        | RP11-17A1.3                | 1.99E-01        | 8.40E-01        | <b>1.08E-03</b> | <b>2.02E-03</b> | 9.60E-01        | 7.55E-01 | <b>4.70E-03</b> | <b>9.56E-03</b> | 1.89E-01        | 2.54E-01        | 7.26E-02        |
| rs2470300        | RP11-17A1.3                | 1.90E-01        | 9.67E-01        | <b>4.75E-03</b> | <b>8.13E-03</b> | 4.05E-01        | 7.51E-01 | <b>2.37E-03</b> | <b>5.07E-03</b> | 9.78E-01        | 5.31E-01        | 5.71E-02        |
| rs2429756        | RP11-17A1.3                | 1.99E-01        | 8.41E-01        | <b>1.08E-03</b> | <b>2.03E-03</b> | 9.60E-01        | 7.55E-01 | <b>4.70E-03</b> | <b>9.56E-03</b> | 1.89E-01        | 2.54E-01        | 7.26E-02        |
| rs2429755        | RP11-17A1.3                | 1.99E-01        | 8.41E-01        | <b>1.08E-03</b> | <b>2.03E-03</b> | 9.60E-01        | 7.55E-01 | <b>4.70E-03</b> | <b>9.56E-03</b> | 1.89E-01        | 2.54E-01        | 7.26E-02        |
| rs2429754        | RP11-17A1.3                | 1.99E-01        | 8.41E-01        | <b>1.08E-03</b> | <b>2.03E-03</b> | 9.60E-01        | 7.55E-01 | <b>4.70E-03</b> | <b>9.56E-03</b> | 1.89E-01        | 2.54E-01        | 7.26E-02        |
| rs2429753        | RP11-17A1.3                | 1.99E-01        | 8.41E-01        | <b>1.08E-03</b> | <b>2.03E-03</b> | 9.60E-01        | 7.55E-01 | <b>4.70E-03</b> | <b>9.56E-03</b> | 1.89E-01        | 2.54E-01        | 7.26E-02        |
| rs2041471        | RP11-17A1.3                | 2.56E-01        | 9.55E-01        | <b>5.86E-04</b> | <b>1.08E-03</b> | 9.16E-01        | 7.83E-01 | <b>4.66E-03</b> | <b>9.46E-03</b> | 2.89E-01        | 3.18E-01        | 1.06E-01        |
| rs2429752        | RP11-17A1.3                | 2.05E-01        | 8.78E-01        | <b>1.08E-03</b> | <b>2.03E-03</b> | 9.88E-01        | 6.96E-01 | <b>4.62E-03</b> | <b>9.38E-03</b> | 2.06E-01        | 2.61E-01        | 7.06E-02        |
| rs2429751        | RP11-17A1.3                | 1.90E-01        | 9.65E-01        | <b>4.67E-03</b> | <b>7.96E-03</b> | 4.05E-01        | 7.49E-01 | <b>2.28E-03</b> | <b>4.84E-03</b> | 9.80E-01        | 5.32E-01        | 5.73E-02        |
| rs929538         | RP11-17A1.3                | 1.30E-01        | 6.47E-01        | <b>4.52E-03</b> | <b>7.28E-03</b> | 3.41E-01        | 6.05E-01 | <b>1.56E-03</b> | <b>2.87E-03</b> | 7.00E-01        | 4.10E-01        | 6.99E-02        |
| chr11:81433204:I | RP11-664H7.2-RP11-876F14.2 | <b>1.38E-04</b> | <b>3.16E-05</b> | 3.70E-01        | 8.58E-01        | <b>1.16E-02</b> | 1.01E-01 | 9.10E-01        | 4.67E-01        | <b>1.49E-03</b> | <b>8.81E-04</b> | 9.76E-01        |
| chr11:81454803:D | RP11-664H7.2-RP11-876F14.2 | <b>6.63E-05</b> | <b>2.33E-06</b> | 4.26E-01        | 8.25E-01        | 1.55E-01        | 8.32E-01 | 6.55E-01        | 2.09E-01        | <b>3.39E-03</b> | <b>1.04E-02</b> | 6.84E-01        |
| rs116474042      | RP11-755E23.3-CCDC67       | <b>3.81E-07</b> | <b>1.88E-04</b> | NA              | NA              | 7.60E-01        | 9.90E-01 | NA              | NA              | 5.20E-01        | 4.06E-01        | NA              |

|                   |                                 |                 |                 |                 |                 |                 |                 |                 |          |                 |                 |                 |
|-------------------|---------------------------------|-----------------|-----------------|-----------------|-----------------|-----------------|-----------------|-----------------|----------|-----------------|-----------------|-----------------|
| rs116617578       | CCDC67                          | <b>1.91E-06</b> | <b>2.12E-04</b> | NA              | NA              | NA              | NA              | NA              | NA       | 7.25E-01        | 4.15E-01        | NA              |
| rs12807443        | RP11-25I9.2                     | NA              | NA              | <b>4.52E-02</b> | 5.69E-02        | 2.73E-01        | 3.10E-01        | <b>4.91E-04</b> | 6.02E-02 | 2.20E-01        | 2.83E-01        | <b>3.44E-02</b> |
| rs71475112        | RP11-25I9.2                     | 4.73E-01        | 1.31E-01        | <b>4.04E-02</b> | <b>4.96E-02</b> | 9.95E-01        | 9.09E-01        | <b>5.53E-04</b> | 6.48E-02 | 6.36E-01        | 7.59E-01        | <b>2.00E-02</b> |
| rs34883645        | RP11-25I9.2                     | 4.52E-01        | 1.18E-01        | <b>4.15E-02</b> | 5.12E-02        | 9.93E-01        | 8.90E-01        | <b>5.00E-04</b> | 6.04E-02 | 5.94E-01        | 7.34E-01        | <b>2.85E-02</b> |
| rs17705117        | RP11-25I9.2                     | 4.52E-01        | 1.19E-01        | <b>4.15E-02</b> | 5.12E-02        | 9.93E-01        | 8.90E-01        | <b>5.01E-04</b> | 6.04E-02 | 5.94E-01        | 7.34E-01        | <b>2.85E-02</b> |
| rs10502107        | RP11-25I9.2                     | NA              | NA              | <b>4.70E-02</b> | 6.05E-02        | NA              | NA              | <b>6.61E-04</b> | 5.33E-02 | 2.54E-01        | 3.11E-01        | <b>2.88E-02</b> |
| rs71475113        | RP11-25I9.2                     | 4.80E-01        | 1.43E-01        | <b>4.68E-02</b> | 5.99E-02        | 9.88E-01        | 9.05E-01        | <b>6.83E-04</b> | 5.38E-02 | 6.40E-01        | 7.71E-01        | <b>2.55E-02</b> |
| rs74640618        | RP11-25I9.2                     | 4.80E-01        | 1.43E-01        | <b>4.68E-02</b> | 5.99E-02        | 9.96E-01        | 8.95E-01        | <b>6.71E-04</b> | 5.89E-02 | 6.37E-01        | 7.71E-01        | <b>2.55E-02</b> |
| chr11:108899423:D | RP11-25I9.2                     | 3.27E-01        | 2.65E-01        | <b>8.54E-03</b> | <b>1.25E-02</b> | 8.04E-01        | 9.34E-01        | <b>1.92E-04</b> | 5.59E-02 | 1.93E-01        | 1.26E-01        | <b>2.32E-02</b> |
| rs12785289        | RP11-25I9.2                     | 5.73E-01        | 1.82E-01        | <b>4.67E-02</b> | 5.97E-02        | 7.77E-01        | 6.94E-01        | <b>7.07E-04</b> | 5.49E-02 | 6.38E-01        | 7.72E-01        | <b>2.54E-02</b> |
| rs71475116        | P11-25I9.2,RP11-25I9.2-RNA5SP34 | 3.34E-01        | 6.93E-02        | <b>4.61E-02</b> | 6.29E-02        | 9.25E-01        | 7.10E-01        | <b>1.66E-03</b> | 8.04E-02 | 9.11E-01        | 9.87E-01        | <b>6.18E-03</b> |
| rs145386102       | RP11-25I9.2-RNA5SP349           | 3.40E-01        | 8.46E-02        | 6.01E-02        | 7.36E-02        | 9.12E-01        | 8.87E-01        | <b>5.84E-04</b> | 6.08E-02 | 6.64E-01        | 7.85E-01        | <b>2.30E-02</b> |
| rs6589099         | TFAMP2-RP11-361A21.1            | <b>7.71E-04</b> | <b>2.06E-03</b> | NA              | NA              | <b>2.95E-04</b> | <b>1.27E-03</b> | NA              | NA       | <b>6.02E-03</b> | <b>3.08E-03</b> | 2.62E-01        |
| rs4763938         | CD69-RP11-75L1.6                | <b>1.43E-04</b> | <b>2.20E-04</b> | 9.01E-02        | 8.96E-02        | 1.21E-01        | 3.99E-01        | 1.72E-01        | 2.71E-01 | <b>4.24E-02</b> | <b>1.62E-02</b> | 1.24E-01        |
| rs193047854       | RNU1-69P-GSTP1P1                | <b>6.49E-05</b> | <b>2.84E-04</b> | NA              | NA              | <b>3.90E-03</b> | <b>7.33E-04</b> | NA              | NA       | 5.43E-01        | 8.74E-01        | NA              |
| rs963921          | RP11-13A1.3                     | <b>1.13E-04</b> | <b>1.76E-04</b> | 6.55E-01        | 7.02E-01        | 1.84E-01        | 2.65E-01        | 1.55E-01        | 1.48E-01 | <b>3.39E-02</b> | <b>1.55E-02</b> | 9.54E-01        |
| rs61934921        | A5SP377,RP11-495K9.6,RP11-495K  | 3.96E-01        | 5.52E-01        | <b>1.65E-04</b> | <b>6.20E-05</b> | 4.76E-01        | 7.31E-01        | <b>1.70E-02</b> | 8.07E-02 | 5.50E-01        | 3.81E-01        | 1.36E-01        |
| rs149438816       | RP11-196P2.1-MIR3169            | <b>8.54E-05</b> | <b>1.66E-06</b> | NA              | NA              | 1.18E-01        | 1.70E-01        | NA              | NA       | 6.58E-02        | 1.72E-01        | NA              |
| rs116063167       | BCAS2P3-RBM26                   | <b>4.79E-03</b> | <b>4.50E-03</b> | NA              | NA              | 1.29E-01        | 5.64E-02        | NA              | NA       | <b>1.38E-04</b> | <b>6.25E-05</b> | NA              |
| rs116444748       | BCAS2P3-RBM26                   | <b>4.70E-03</b> | <b>4.45E-03</b> | NA              | NA              | 1.33E-01        | 5.77E-02        | NA              | NA       | <b>1.24E-04</b> | <b>6.22E-05</b> | NA              |
| rs10162069        | BCAS2P3-RBM26                   | <b>1.66E-02</b> | <b>1.74E-02</b> | NA              | NA              | <b>8.09E-06</b> | <b>4.19E-04</b> | NA              | NA       | 1.90E-01        | 2.02E-01        | NA              |
| rs9601205         | BCAS2P3-RBM26                   | <b>1.45E-02</b> | <b>1.61E-02</b> | NA              | NA              | <b>7.97E-06</b> | <b>3.20E-04</b> | NA              | NA       | 1.38E-01        | 1.34E-01        | NA              |
| rs9601206         | BCAS2P3-RBM26                   | <b>1.44E-02</b> | <b>1.61E-02</b> | NA              | NA              | <b>7.95E-06</b> | <b>3.19E-04</b> | NA              | NA       | 1.37E-01        | 1.34E-01        | NA              |
| rs79256830        | BCAS2P3-RBM26                   | <b>1.43E-02</b> | <b>1.59E-02</b> | NA              | NA              | <b>7.96E-06</b> | <b>3.18E-04</b> | NA              | NA       | 1.37E-01        | 1.33E-01        | NA              |
| rs2329115         | BCAS2P3-RBM26                   | <b>4.76E-02</b> | <b>2.65E-02</b> | NA              | NA              | <b>3.15E-06</b> | <b>1.02E-04</b> | NA              | NA       | 3.20E-01        | 3.57E-01        | NA              |
| rs4885623         | BCAS2P3-RBM26                   | <b>3.43E-02</b> | <b>1.98E-02</b> | NA              | NA              | <b>2.75E-06</b> | <b>5.40E-05</b> | NA              | NA       | 2.88E-01        | 3.66E-01        | NA              |
| rs143748364       | BCAS2P3-RBM26                   | <b>5.60E-03</b> | <b>6.55E-03</b> | NA              | NA              | <b>3.09E-06</b> | <b>1.00E-04</b> | NA              | NA       | 1.37E-01        | 1.55E-01        | NA              |
| rs116669275       | RBM26,RBM26-AS1                 | <b>7.78E-03</b> | <b>1.10E-02</b> | NA              | NA              | <b>1.29E-04</b> | <b>3.02E-03</b> | NA              | NA       | <b>4.57E-02</b> | <b>3.40E-02</b> | NA              |
| rs9601228         | RBM26-AS1                       | <b>7.58E-03</b> | <b>1.08E-02</b> | NA              | NA              | <b>1.33E-04</b> | <b>3.10E-03</b> | NA              | NA       | <b>4.66E-02</b> | <b>3.45E-02</b> | NA              |
| rs9601230         | RBM26-AS1-NDFIP2-AS1            | <b>6.66E-03</b> | <b>7.77E-03</b> | NA              | NA              | <b>1.59E-04</b> | <b>3.74E-03</b> | NA              | NA       | <b>4.33E-02</b> | <b>3.54E-02</b> | NA              |
| rs9593398         | RBM26-AS1-NDFIP2-AS1            | <b>4.99E-03</b> | <b>5.67E-03</b> | NA              | NA              | <b>1.40E-04</b> | <b>3.51E-03</b> | NA              | NA       | <b>4.52E-02</b> | <b>3.41E-02</b> | NA              |
| chr13:80031949:D  | RBM26-AS1-NDFIP2-AS1            | <b>5.00E-03</b> | <b>4.35E-03</b> | NA              | NA              | <b>2.88E-04</b> | <b>4.85E-03</b> | NA              | NA       | 1.14E-01        | 1.01E-01        | NA              |
| rs79054219        | NDFIP2,NDFIP2-AS1               | <b>9.31E-03</b> | <b>8.91E-03</b> | NA              | NA              | <b>1.35E-04</b> | <b>3.70E-03</b> | NA              | NA       | <b>4.10E-02</b> | <b>3.08E-02</b> | NA              |
| rs115435584       | NDFIP2                          | <b>9.85E-03</b> | <b>6.84E-03</b> | NA              | NA              | <b>3.34E-04</b> | <b>5.69E-03</b> | NA              | NA       | 8.85E-02        | 6.88E-02        | NA              |
| rs9601236         | NDFIP2                          | <b>1.45E-02</b> | <b>1.15E-02</b> | NA              | NA              | <b>1.48E-04</b> | <b>3.76E-03</b> | NA              | NA       | <b>3.03E-02</b> | <b>1.92E-02</b> | NA              |
| rs114858730       | NDFIP2                          | <b>6.32E-03</b> | <b>6.13E-03</b> | NA              | NA              | <b>4.17E-04</b> | <b>5.35E-03</b> | NA              | NA       | 5.67E-02        | <b>3.76E-02</b> | NA              |
| rs77796609        | NDFIP2                          | <b>1.45E-02</b> | <b>1.15E-02</b> | NA              | NA              | <b>1.49E-04</b> | <b>3.78E-03</b> | NA              | NA       | <b>2.97E-02</b> | <b>1.87E-02</b> | NA              |
| rs76602452        | NDFIP2                          | <b>1.44E-02</b> | <b>1.14E-02</b> | NA              | NA              | <b>1.51E-04</b> | <b>3.80E-03</b> | NA              | NA       | <b>2.95E-02</b> | <b>1.86E-02</b> | NA              |
| rs116284533       | NDFIP2                          | <b>1.13E-02</b> | <b>8.19E-03</b> | NA              | NA              | <b>3.47E-04</b> | <b>5.79E-03</b> | NA              | NA       | 8.65E-02        | 6.67E-02        | NA              |
| rs9593403         | NDFIP2,NDFIP2-LINC01068         | <b>8.20E-03</b> | <b>5.52E-03</b> | NA              | NA              | <b>2.92E-04</b> | <b>4.38E-03</b> | NA              | NA       | 8.54E-02        | 6.57E-02        | NA              |
| rs115651893       | NDFIP2,NDFIP2-LINC01068         | <b>1.22E-02</b> | <b>9.37E-03</b> | NA              | NA              | <b>1.22E-04</b> | <b>2.72E-03</b> | NA              | NA       | <b>2.94E-02</b> | <b>1.84E-02</b> | NA              |
| rs13378140        | LINC01068                       | <b>8.39E-03</b> | <b>5.51E-03</b> | NA              | NA              | <b>2.77E-04</b> | <b>4.17E-03</b> | NA              | NA       | 8.48E-02        | 6.55E-02        | NA              |
| rs138672395       | LINC01068                       | <b>8.40E-03</b> | <b>5.51E-03</b> | NA              | NA              | <b>2.77E-04</b> | <b>4.18E-03</b> | NA              | NA       | 8.49E-02        | 6.56E-02        | NA              |
| rs9601245         | LINC01068-LINC01038             | <b>8.90E-03</b> | <b>5.28E-03</b> | NA              | NA              | <b>2.93E-04</b> | <b>4.24E-03</b> | NA              | NA       | 8.56E-02        | 6.65E-02        | NA              |
| rs9601246         | LINC01068-LINC01038             | <b>9.00E-03</b> | <b>5.21E-03</b> | NA              | NA              | <b>2.96E-04</b> | <b>4.26E-03</b> | NA              | NA       | 8.58E-02        | 6.67E-02        | NA              |
| rs9514837         | TNFSF13B-HCFC2P1                | <b>7.35E-05</b> | <b>1.80E-04</b> | 8.63E-01        | 5.87E-01        | <b>1.26E-02</b> | <b>1.68E-04</b> | 1.23E-01        | 9.25E-01 | 1.72E-01        | 2.93E-01        | 4.74E-01        |

|                  |                                 |                 |                 |                 |                 |                 |                 |                 |                 |                 |                 |                 |
|------------------|---------------------------------|-----------------|-----------------|-----------------|-----------------|-----------------|-----------------|-----------------|-----------------|-----------------|-----------------|-----------------|
| rs9520847        | TNFSF13B-HCFC2P1                | <b>8.72E-05</b> | <b>2.79E-04</b> | 8.15E-01        | 6.43E-01        | <b>1.18E-02</b> | <b>2.25E-04</b> | 2.95E-01        | 8.47E-01        | 2.41E-01        | 3.80E-01        | 6.61E-01        |
| rs7143485        | CTD-2552B11.2-CTD-2552B11.3     | <b>2.37E-04</b> | <b>2.20E-03</b> | 4.83E-01        | 5.00E-01        | 2.78E-01        | 3.40E-01        | 1.00E+00        | 7.37E-01        | <b>1.06E-03</b> | <b>3.19E-04</b> | 4.65E-01        |
| rs7143702        | CTD-2552B11.2-CTD-2552B11.3     | <b>2.40E-04</b> | <b>2.18E-03</b> | 4.84E-01        | 5.00E-01        | 2.70E-01        | 3.23E-01        | 9.99E-01        | 7.35E-01        | <b>1.05E-03</b> | <b>3.18E-04</b> | 4.74E-01        |
| rs77669601       | RP3-514A23.2-DPF3               | NA              | NA              | <b>1.80E-03</b> | <b>3.29E-02</b> | NA              | NA              | <b>6.22E-05</b> | 1.26E-01        | 3.07E-01        | 1.35E-01        | 4.40E-01        |
| chr14:73068127:D | RP3-514A23.2-DPF3               | NA              | NA              | <b>1.85E-03</b> | <b>3.39E-02</b> | NA              | NA              | <b>6.37E-05</b> | 1.28E-01        | 6.91E-01        | 2.16E-01        | 4.19E-01        |
| rs144429502      | AC005280.1,C14orf169,HEATR4     | NA              | NA              | <b>1.04E-05</b> | <b>4.14E-04</b> | NA              | NA              | <b>3.43E-02</b> | 2.72E-01        | 2.27E-01        | 7.83E-01        | 4.89E-01        |
| rs999683         | IE3,SYNE3,SYNE3,SYNE3,SYNE3,SY  | <b>1.05E-04</b> | <b>1.72E-03</b> | 1.44E-01        | 1.49E-01        | <b>1.84E-02</b> | <b>2.95E-03</b> | 8.93E-02        | 5.58E-01        | 9.81E-01        | 6.85E-01        | 1.06E-01        |
| rs674117         | RP11-96O20.4,SQRDL              | 4.91E-01        | 9.46E-01        | <b>2.50E-04</b> | <b>7.61E-05</b> | 7.46E-01        | 9.01E-01        | <b>2.73E-02</b> | <b>3.72E-02</b> | 4.79E-01        | 2.47E-01        | 5.42E-02        |
| rs674638         | RP11-96O20.4,SQRDL              | 5.10E-01        | 9.60E-01        | <b>2.57E-04</b> | <b>8.48E-05</b> | 7.31E-01        | 8.91E-01        | <b>2.47E-02</b> | <b>3.54E-02</b> | 5.04E-01        | 2.49E-01        | 5.45E-02        |
| rs674676         | RP11-96O20.4,SQRDL              | 5.07E-01        | 9.59E-01        | <b>2.42E-04</b> | <b>7.46E-05</b> | 7.31E-01        | 8.91E-01        | <b>2.45E-02</b> | <b>3.52E-02</b> | 4.78E-01        | 2.50E-01        | 5.65E-02        |
| rs663992         | RP11-96O20.4,SQRDL              | 5.09E-01        | 9.83E-01        | <b>6.42E-04</b> | <b>1.03E-05</b> | 7.55E-01        | 9.20E-01        | <b>4.62E-02</b> | 8.41E-02        | 4.38E-01        | 2.42E-01        | <b>4.55E-02</b> |
| rs675599         | RP11-96O20.4,SQRDL              | 3.33E-01        | 9.56E-01        | <b>4.46E-04</b> | <b>1.45E-04</b> | 9.55E-01        | 7.96E-01        | <b>1.87E-02</b> | <b>2.75E-02</b> | 3.96E-01        | 2.17E-01        | 7.04E-02        |
| rs664768         | RP11-96O20.4,SQRDL              | 4.53E-01        | 8.67E-01        | <b>2.80E-04</b> | <b>1.30E-04</b> | 8.39E-01        | 9.58E-01        | <b>1.93E-02</b> | <b>3.30E-02</b> | 4.86E-01        | 2.49E-01        | 5.22E-02        |
| rs664824         | RP11-96O20.4,SQRDL              | 4.80E-01        | 9.45E-01        | <b>2.84E-04</b> | <b>1.04E-04</b> | 6.98E-01        | 8.18E-01        | <b>2.32E-02</b> | <b>3.41E-02</b> | 3.85E-01        | 2.01E-01        | 7.60E-02        |
| rs676476         | RP11-96O20.4,SQRDL              | 2.87E-01        | 7.96E-01        | <b>4.84E-04</b> | <b>1.36E-04</b> | 5.85E-01        | 8.00E-01        | <b>1.33E-02</b> | <b>2.29E-02</b> | 3.40E-01        | 1.38E-01        | 5.35E-02        |
| rs189167038      | SNORD11-RNU6-1014P              | NA              | NA              | NA              | NA              | <b>2.64E-09</b> | <b>1.06E-04</b> | NA              | NA              | 9.88E-01        | 6.30E-01        | NA              |
| rs142162415      | SNORD11-RNU6-1014P              | NA              | NA              | NA              | NA              | <b>1.88E-08</b> | <b>3.94E-05</b> | NA              | NA              | 8.44E-01        | 7.50E-01        | NA              |
| rs117047810      | SNORD11-RNU6-1014P              | NA              | NA              | NA              | NA              | <b>5.68E-08</b> | <b>1.05E-04</b> | NA              | NA              | 9.98E-01        | 9.10E-01        | NA              |
| rs144014689      | MEGF11                          | 5.33E-02        | 7.87E-02        | 8.27E-01        | 8.35E-01        | <b>3.38E-02</b> | 5.10E-02        | 2.05E-01        | 7.21E-01        | <b>4.83E-06</b> | <b>1.52E-03</b> | 5.82E-01        |
| rs138761776      | MEFV                            | <b>1.22E-02</b> | <b>2.75E-02</b> | NA              | NA              | <b>1.73E-06</b> | <b>1.57E-03</b> | NA              | NA              | 6.98E-01        | 5.85E-02        | NA              |
| rs11466037       | MEFV                            | <b>6.91E-03</b> | <b>6.93E-03</b> | NA              | NA              | <b>8.08E-07</b> | <b>1.85E-03</b> | NA              | NA              | 6.20E-01        | <b>4.29E-02</b> | NA              |
| rs11466035       | MEFV                            | <b>1.57E-02</b> | <b>3.16E-02</b> | NA              | NA              | <b>1.00E-05</b> | <b>4.75E-03</b> | NA              | NA              | 9.57E-01        | 1.47E-01        | NA              |
| rs7185672        | MEFV                            | <b>9.28E-03</b> | <b>2.46E-02</b> | NA              | NA              | <b>1.41E-06</b> | <b>1.49E-03</b> | NA              | NA              | 7.02E-01        | 5.93E-02        | NA              |
| rs183568578      | MEFV                            | <b>2.67E-03</b> | <b>1.14E-02</b> | NA              | NA              | <b>5.62E-07</b> | <b>1.12E-03</b> | NA              | NA              | 6.33E-01        | <b>4.78E-02</b> | NA              |
| rs57491015       | MEFV                            | <b>2.62E-03</b> | <b>1.11E-02</b> | NA              | NA              | <b>1.35E-06</b> | <b>1.46E-03</b> | NA              | NA              | 7.36E-01        | 6.63E-02        | NA              |
| rs145826624      | MEFV                            | <b>2.77E-03</b> | <b>1.19E-02</b> | NA              | NA              | <b>1.35E-06</b> | <b>1.46E-03</b> | NA              | NA              | 7.04E-01        | 6.10E-02        | NA              |
| rs115453411      | MEFV                            | <b>2.77E-03</b> | <b>1.19E-02</b> | NA              | NA              | <b>1.35E-06</b> | <b>1.46E-03</b> | NA              | NA              | 7.03E-01        | 6.10E-02        | NA              |
| rs77086855       | MEFV,MEFV,MEFV,MEFV,MEFV        | <b>4.39E-03</b> | <b>1.42E-02</b> | NA              | NA              | <b>4.32E-06</b> | <b>3.65E-03</b> | NA              | NA              | 9.70E-01        | 1.56E-01        | NA              |
| rs16953145       | FTO-RP11-324D17.2               | <b>1.04E-03</b> | <b>1.29E-03</b> | NA              | NA              | <b>2.10E-03</b> | <b>9.53E-05</b> | NA              | NA              | <b>4.70E-02</b> | 9.30E-02        | NA              |
| rs16953148       | FTO-RP11-324D17.2               | <b>1.10E-03</b> | <b>1.52E-03</b> | NA              | NA              | <b>4.23E-03</b> | <b>2.18E-04</b> | NA              | NA              | <b>4.63E-02</b> | 9.35E-02        | NA              |
| rs61326721       | FTO-RP11-324D17.2               | <b>1.28E-03</b> | <b>2.14E-03</b> | NA              | NA              | <b>4.38E-03</b> | <b>2.72E-04</b> | NA              | NA              | 6.10E-02        | 1.23E-01        | NA              |
| rs984432         | RP11-481J2.2,GINS3-RP11-481J2.2 | <b>3.16E-05</b> | <b>1.45E-04</b> | NA              | NA              | <b>2.60E-02</b> | <b>3.09E-02</b> | NA              | NA              | 3.28E-01        | 4.09E-01        | NA              |
| rs60090586       | RP11-481J2.2,GINS3-RP11-481J2.2 | <b>3.15E-05</b> | <b>1.45E-04</b> | NA              | NA              | <b>2.59E-02</b> | <b>3.08E-02</b> | NA              | NA              | 3.28E-01        | 4.10E-01        | NA              |
| rs41515846       | RP11-481J2.2                    | <b>1.92E-05</b> | <b>1.04E-04</b> | NA              | NA              | <b>4.61E-02</b> | <b>3.11E-02</b> | NA              | NA              | NA              | NA              | NA              |
| rs116654103      | RP11-356O24.1-RNA5SP428         | <b>2.99E-05</b> | <b>1.82E-05</b> | NA              | NA              | NA              | NA              | NA              | NA              | 9.27E-02        | 7.98E-02        | NA              |
| rs150538526      | RP11-356O24.1-RNA5SP428         | <b>2.86E-05</b> | <b>1.68E-05</b> | NA              | NA              | NA              | NA              | NA              | NA              | 9.35E-02        | 7.99E-02        | NA              |
| rs8109054        | SULT2B1                         | 6.20E-01        | 4.21E-01        | <b>5.74E-04</b> | <b>1.11E-03</b> | 4.46E-01        | 4.38E-01        | <b>9.80E-03</b> | 9.97E-02        | 3.59E-01        | 6.56E-01        | 1.00E-01        |
| rs8108904        | SULT2B1                         | 6.97E-01        | 4.89E-01        | <b>5.22E-04</b> | <b>1.02E-03</b> | 4.50E-01        | 4.37E-01        | <b>9.89E-03</b> | 1.05E-01        | 3.43E-01        | 6.40E-01        | 1.03E-01        |
| rs35747850       | SULT2B1                         | 7.42E-01        | 5.07E-01        | <b>4.16E-04</b> | <b>8.54E-04</b> | 4.97E-01        | 4.76E-01        | <b>1.03E-02</b> | 1.17E-01        | 3.23E-01        | 6.35E-01        | 8.75E-02        |
| chr19:49083629:D | SULT2B1                         | 9.69E-01        | 5.85E-01        | <b>7.98E-04</b> | <b>2.46E-03</b> | 3.32E-01        | 3.79E-01        | <b>7.41E-03</b> | 1.06E-01        | 1.47E-01        | 3.94E-01        | 5.32E-02        |
| rs11878647       | SULT2B1                         | 7.98E-01        | 3.13E-01        | <b>2.44E-04</b> | <b>6.87E-04</b> | 3.53E-01        | 3.80E-01        | <b>8.64E-03</b> | 1.40E-01        | 3.61E-01        | 6.94E-01        | 5.59E-02        |
| rs11878722       | SULT2B1                         | 8.41E-01        | 3.43E-01        | <b>1.64E-04</b> | <b>5.15E-04</b> | 3.11E-01        | 3.32E-01        | <b>8.94E-03</b> | 1.36E-01        | 2.95E-01        | 6.29E-01        | 5.40E-02        |
| rs61416619       | SULT2B1                         | 9.54E-01        | 5.84E-01        | <b>1.60E-04</b> | <b>3.50E-04</b> | 8.05E-01        | 7.26E-01        | <b>9.46E-03</b> | 1.75E-01        | 2.40E-01        | 4.75E-01        | 5.63E-02        |
| chr19:49087071:D | SULT2B1                         | 7.80E-01        | 6.65E-01        | <b>1.98E-03</b> | <b>2.92E-03</b> | 7.63E-01        | 2.20E-01        | <b>3.53E-03</b> | 7.54E-02        | 9.23E-01        | 8.63E-01        | 7.87E-02        |
| rs73053552       | SULT2B1                         | 2.31E-01        | 9.73E-02        | <b>1.47E-04</b> | <b>3.27E-04</b> | 1.27E-01        | 1.67E-01        | <b>1.46E-02</b> | 2.17E-01        | 6.79E-02        | 1.62E-01        | <b>4.32E-02</b> |
| rs73053558       | SULT2B1                         | 8.11E-02        | <b>2.25E-02</b> | <b>1.18E-04</b> | <b>4.07E-04</b> | 2.06E-01        | 1.72E-01        | <b>1.34E-02</b> | 2.11E-01        | 7.32E-02        | 1.34E-01        | <b>3.12E-02</b> |

|                  |                               |                 |                 |                 |                 |                 |                 |                 |                 |                 |                 |                 |
|------------------|-------------------------------|-----------------|-----------------|-----------------|-----------------|-----------------|-----------------|-----------------|-----------------|-----------------|-----------------|-----------------|
| chr19:50860233:D | NAPSA,NR1H2                   | 1.89E-01        | 2.27E-01        | <b>1.35E-03</b> | <b>7.60E-04</b> | <b>3.19E-02</b> | 2.90E-01        | <b>1.66E-03</b> | <b>4.44E-03</b> | 9.85E-01        | 8.11E-01        | 2.81E-01        |
| rs2695121        | NR1H2                         | 6.50E-01        | 3.67E-01        | <b>2.98E-03</b> | <b>2.00E-03</b> | 8.47E-01        | 6.46E-01        | <b>6.34E-04</b> | <b>4.54E-03</b> | 6.00E-01        | 6.92E-01        | 2.03E-01        |
| rs2248949        | NR1H2                         | 2.48E-01        | 2.38E-01        | <b>2.26E-03</b> | <b>1.49E-03</b> | 6.77E-01        | 6.74E-01        | <b>9.93E-04</b> | <b>6.99E-03</b> | 4.56E-01        | 5.79E-01        | 2.00E-01        |
| rs6037613        | ATRN                          | <b>3.42E-03</b> | <b>5.57E-03</b> | NA              | NA              | 1.11E-01        | 8.00E-01        | NA              | NA              | <b>2.04E-04</b> | <b>1.40E-03</b> | NA              |
| rs6115932        | ATRN                          | <b>3.42E-03</b> | <b>5.58E-03</b> | NA              | NA              | 1.12E-01        | 8.06E-01        | NA              | NA              | <b>2.09E-04</b> | <b>1.42E-03</b> | NA              |
| rs7343859        | ATRN                          | <b>3.42E-03</b> | <b>5.59E-03</b> | NA              | NA              | 1.12E-01        | 8.06E-01        | NA              | NA              | <b>2.09E-04</b> | <b>1.42E-03</b> | NA              |
| rs6051913        | ATRN                          | <b>3.41E-03</b> | <b>5.60E-03</b> | NA              | NA              | 1.13E-01        | 8.06E-01        | NA              | NA              | <b>2.10E-04</b> | <b>1.42E-03</b> | NA              |
| rs6051919        | ATRN                          | <b>3.63E-03</b> | <b>5.70E-03</b> | NA              | NA              | 9.81E-02        | 7.23E-01        | NA              | NA              | <b>1.71E-04</b> | <b>1.45E-03</b> | NA              |
| rs6107305        | ATRN                          | <b>2.83E-03</b> | <b>4.94E-03</b> | NA              | NA              | 1.01E-01        | 7.28E-01        | NA              | NA              | <b>1.81E-04</b> | <b>1.57E-03</b> | NA              |
| rs6131652        | MACROD2                       | 8.94E-01        | 8.76E-01        | 8.86E-02        | 5.50E-02        | 2.99E-01        | 9.76E-01        | <b>1.05E-06</b> | <b>8.99E-06</b> | 5.85E-01        | 5.97E-01        | 3.70E-01        |
| rs28650065       | OVOL2                         | <b>2.13E-02</b> | <b>4.08E-03</b> | <b>1.72E-03</b> | 5.25E-02        | 3.37E-01        | 3.97E-01        | 6.58E-02        | <b>1.38E-02</b> | 8.54E-01        | 8.35E-01        | <b>4.30E-02</b> |
| chr20:21706604:I | PAX1-SLC25A6P1                | <b>6.24E-04</b> | <b>1.07E-03</b> | NA              | NA              | <b>7.07E-04</b> | <b>5.01E-03</b> | NA              | NA              | 1.89E-01        | 5.46E-01        | NA              |
| rs114269992      | RP5-860P4.2-CST7              | 1.06E-01        | <b>3.98E-02</b> | NA              | NA              | <b>2.13E-07</b> | <b>1.63E-07</b> | NA              | NA              | 7.28E-01        | 9.55E-01        | NA              |
| rs114620529      | RP5-860P4.2-CST7              | 1.11E-01        | <b>4.18E-02</b> | NA              | NA              | <b>2.15E-07</b> | <b>1.61E-07</b> | NA              | NA              | 7.40E-01        | 9.34E-01        | NA              |
| rs116629084      | RP5-860P4.2-CST7              | 1.16E-01        | <b>4.10E-02</b> | NA              | NA              | <b>1.70E-07</b> | <b>1.27E-07</b> | NA              | NA              | 7.42E-01        | 8.99E-01        | NA              |
| rs115384512      | RP5-860P4.2-CST7              | 8.91E-02        | <b>2.61E-02</b> | NA              | NA              | <b>8.91E-08</b> | <b>7.19E-08</b> | NA              | NA              | 7.18E-01        | 9.63E-01        | NA              |
| rs147641662      | CST7,RP5-860P4.2-CST7         | 8.88E-02        | <b>2.59E-02</b> | NA              | NA              | <b>8.87E-08</b> | <b>7.13E-08</b> | NA              | NA              | 7.18E-01        | 9.64E-01        | NA              |
| rs191783144      | CST7,RP5-860P4.2-CST7         | 8.85E-02        | <b>2.58E-02</b> | NA              | NA              | <b>8.81E-08</b> | <b>7.07E-08</b> | NA              | NA              | 7.18E-01        | 9.64E-01        | NA              |
| rs146806338      | CST7,RP5-860P4.2-CST7         | 8.85E-02        | <b>2.58E-02</b> | NA              | NA              | <b>8.80E-08</b> | <b>7.03E-08</b> | NA              | NA              | 7.18E-01        | 9.64E-01        | NA              |
| rs114828727      | CST7,APMAP,CST7-APMAP         | 9.23E-02        | <b>2.65E-02</b> | NA              | NA              | <b>9.01E-08</b> | <b>6.92E-08</b> | NA              | NA              | 7.16E-01        | 9.68E-01        | NA              |
| rs114128002      | APMAP                         | 9.79E-02        | <b>2.68E-02</b> | NA              | NA              | <b>8.06E-08</b> | <b>6.33E-08</b> | NA              | NA              | 6.27E-01        | 8.54E-01        | NA              |
| rs115342711      | RNU6-1257P,APMAP              | 1.08E-01        | <b>3.55E-02</b> | NA              | NA              | <b>2.54E-07</b> | <b>1.15E-07</b> | NA              | NA              | 5.73E-01        | 9.16E-01        | NA              |
| chr20:24955422:I | RNU6-1257P,APMAP              | 1.08E-01        | <b>3.55E-02</b> | NA              | NA              | <b>2.54E-07</b> | <b>1.15E-07</b> | NA              | NA              | 5.72E-01        | 9.13E-01        | NA              |
| rs115764440      | APMAP                         | 1.09E-01        | <b>3.58E-02</b> | NA              | NA              | <b>2.33E-07</b> | <b>9.03E-08</b> | NA              | NA              | 5.68E-01        | 9.08E-01        | NA              |
| rs116068335      | APMAP-ACSS1                   | 1.28E-01        | <b>3.80E-02</b> | NA              | NA              | <b>1.66E-07</b> | <b>5.62E-08</b> | NA              | NA              | 3.06E-01        | 5.37E-01        | NA              |
| rs114637142      | ACSS1,APMAP-ACSS1             | 1.24E-01        | <b>2.98E-02</b> | NA              | NA              | <b>9.15E-08</b> | <b>7.49E-08</b> | NA              | NA              | 4.96E-01        | 6.46E-01        | NA              |
| rs114071901      | ACSS1                         | 1.40E-01        | <b>3.48E-02</b> | NA              | NA              | <b>1.06E-07</b> | <b>9.71E-08</b> | NA              | NA              | 4.94E-01        | 6.39E-01        | NA              |
| rs113232742      | ACSS1                         | 1.53E-01        | <b>3.94E-02</b> | NA              | NA              | <b>8.82E-08</b> | <b>8.36E-08</b> | NA              | NA              | 4.93E-01        | 6.36E-01        | NA              |
| rs114199928      | ACSS1                         | 1.57E-01        | <b>4.06E-02</b> | NA              | NA              | <b>8.42E-08</b> | <b>8.06E-08</b> | NA              | NA              | 4.93E-01        | 6.36E-01        | NA              |
| rs114836364      | ACSS1                         | 1.62E-01        | <b>4.24E-02</b> | NA              | NA              | <b>8.23E-08</b> | <b>7.97E-08</b> | NA              | NA              | 4.92E-01        | 6.34E-01        | NA              |
| rs116669368      | ACSS1                         | 1.26E-01        | <b>4.37E-02</b> | NA              | NA              | <b>5.08E-08</b> | <b>6.02E-08</b> | NA              | NA              | 6.91E-01        | 8.59E-01        | NA              |
| rs145379934      | ACSS1                         | 1.63E-01        | 8.55E-02        | NA              | NA              | <b>3.96E-08</b> | <b>5.64E-08</b> | NA              | NA              | 6.96E-01        | 8.68E-01        | NA              |
| rs6022230        | TSHZ2                         | <b>9.97E-03</b> | <b>3.43E-02</b> | 5.26E-01        | 3.90E-01        | <b>5.21E-03</b> | <b>2.53E-03</b> | 2.09E-01        | 5.13E-01        | <b>4.29E-03</b> | <b>5.04E-03</b> | 4.94E-01        |
| rs6013609        | TSHZ2                         | <b>1.07E-02</b> | <b>3.83E-02</b> | 4.72E-01        | 3.49E-01        | <b>4.96E-03</b> | <b>2.33E-03</b> | 1.78E-01        | 4.70E-01        | <b>1.01E-03</b> | <b>9.76E-04</b> | 3.91E-01        |
| rs6022233        | TSHZ2                         | <b>9.81E-03</b> | <b>3.80E-02</b> | 5.00E-01        | 3.73E-01        | <b>3.76E-03</b> | <b>1.97E-03</b> | 1.84E-01        | 4.92E-01        | <b>1.01E-03</b> | <b>9.66E-04</b> | 3.99E-01        |
| rs964886         | TSHZ2                         | <b>5.49E-03</b> | <b>2.30E-02</b> | 4.99E-01        | 3.77E-01        | <b>3.88E-03</b> | <b>1.95E-03</b> | 1.81E-01        | 5.03E-01        | <b>1.36E-03</b> | <b>1.14E-03</b> | 3.82E-01        |
| rs6022236        | TSHZ2                         | <b>1.54E-02</b> | 5.78E-02        | 4.65E-01        | 3.32E-01        | <b>4.42E-03</b> | <b>2.17E-03</b> | 1.73E-01        | 4.92E-01        | <b>1.26E-03</b> | <b>1.06E-03</b> | 3.57E-01        |
| rs6022237        | TSHZ2                         | <b>2.91E-03</b> | <b>3.99E-02</b> | 4.76E-01        | 3.74E-01        | <b>3.00E-02</b> | <b>1.55E-02</b> | 1.93E-01        | 5.23E-01        | <b>6.70E-04</b> | <b>3.54E-04</b> | 3.83E-01        |
| rs6014553        | RP5-1010E17.1-CBLN4           | <b>8.81E-05</b> | <b>6.44E-05</b> | 8.13E-01        | 9.91E-01        | 2.38E-01        | 7.31E-01        | 7.77E-02        | 7.45E-01        | <b>2.08E-02</b> | <b>2.40E-02</b> | 2.33E-01        |
| rs6014555        | RP5-1010E17.1-CBLN4           | <b>1.56E-04</b> | <b>7.69E-05</b> | 8.68E-01        | 9.48E-01        | 6.19E-02        | 2.72E-01        | <b>4.89E-02</b> | 6.52E-01        | 8.71E-02        | 8.54E-02        | 3.80E-01        |
| rs2427339        | ρ5-908M14.5,RP5-908M14.5-GAT  | <b>1.11E-03</b> | <b>2.99E-04</b> | 7.33E-01        | 9.74E-01        | <b>3.07E-03</b> | <b>4.20E-02</b> | 4.71E-01        | 6.99E-01        | 1.50E-01        | 7.22E-01        | 5.07E-01        |
| rs78068107       | ρP000473.8,AP000473.8-RNU1-98 | <b>3.98E-05</b> | <b>2.69E-04</b> | NA              | NA              | 5.36E-02        | <b>1.52E-02</b> | NA              | NA              | 2.21E-01        | 1.20E-01        | NA              |
| rs78108129       | AP000473.8-RNU1-98P           | <b>1.28E-04</b> | <b>6.71E-04</b> | NA              | NA              | <b>9.46E-03</b> | <b>2.38E-03</b> | NA              | NA              | 4.45E-01        | 2.36E-01        | NA              |
| rs2833695        | LINC00159                     | <b>1.77E-04</b> | <b>3.60E-03</b> | 6.26E-01        | 3.70E-01        | <b>4.73E-02</b> | 1.23E-01        | 1.90E-01        | 3.54E-01        | 1.15E-01        | 2.25E-01        | 2.49E-01        |
| rs2833696        | LINC00159                     | <b>1.18E-04</b> | <b>6.59E-04</b> | 4.03E-01        | 2.53E-01        | <b>2.93E-02</b> | <b>2.90E-02</b> | 2.58E-01        | 4.87E-01        | <b>1.09E-02</b> | 5.44E-02        | 4.14E-01        |
| rs2833702        | LINC00159                     | <b>1.99E-04</b> | <b>4.26E-04</b> | 8.02E-02        | <b>1.80E-02</b> | 5.47E-02        | <b>2.44E-02</b> | 1.14E-01        | 1.19E-01        | 7.65E-02        | 4.01E-01        | 6.02E-01        |

|                  |                                |                 |                 |                 |                 |                 |                 |                 |                 |                 |          |          |
|------------------|--------------------------------|-----------------|-----------------|-----------------|-----------------|-----------------|-----------------|-----------------|-----------------|-----------------|----------|----------|
| rs2833703        | LINC00159                      | <b>4.45E-04</b> | <b>6.89E-04</b> | 6.50E-02        | <b>2.11E-02</b> | 5.26E-02        | <b>2.31E-02</b> | 8.29E-02        | 8.06E-02        | <b>3.53E-02</b> | 1.57E-01 | 5.41E-01 |
| rs11088207       | LINC00159                      | <b>4.34E-04</b> | <b>6.83E-04</b> | 6.52E-02        | <b>2.11E-02</b> | 5.07E-02        | <b>2.21E-02</b> | 8.18E-02        | 7.86E-02        | <b>3.58E-02</b> | 1.58E-01 | 5.44E-01 |
| rs2833704        | LINC00159                      | <b>4.18E-04</b> | <b>6.76E-04</b> | 6.55E-02        | <b>2.10E-02</b> | <b>4.82E-02</b> | <b>2.09E-02</b> | 8.03E-02        | 7.58E-02        | <b>3.65E-02</b> | 1.61E-01 | 5.47E-01 |
| rs11088208       | LINC00159                      | <b>4.10E-04</b> | <b>6.73E-04</b> | 6.56E-02        | <b>2.10E-02</b> | <b>4.68E-02</b> | <b>2.01E-02</b> | 7.94E-02        | 7.41E-02        | <b>3.69E-02</b> | 1.62E-01 | 5.48E-01 |
| rs12483370       | LINC00159                      | <b>3.77E-04</b> | <b>6.30E-04</b> | 6.65E-02        | <b>2.12E-02</b> | <b>4.48E-02</b> | <b>1.91E-02</b> | 7.78E-02        | 7.19E-02        | <b>3.76E-02</b> | 1.65E-01 | 5.48E-01 |
| rs2833705        | LINC00159                      | <b>4.62E-04</b> | <b>6.99E-04</b> | 6.88E-02        | <b>2.26E-02</b> | 5.68E-02        | <b>2.48E-02</b> | 1.03E-01        | 7.76E-02        | <b>3.15E-02</b> | 1.40E-01 | 5.25E-01 |
| rs12483543       | LINC00159                      | <b>3.02E-04</b> | <b>5.96E-04</b> | 5.90E-02        | <b>1.94E-02</b> | <b>3.58E-02</b> | <b>1.44E-02</b> | 8.67E-02        | 6.99E-02        | <b>3.50E-02</b> | 1.47E-01 | 5.90E-01 |
| rs11088209       | LINC00159                      | <b>3.75E-04</b> | <b>6.48E-04</b> | 6.39E-02        | <b>2.12E-02</b> | <b>3.70E-02</b> | <b>1.41E-02</b> | 8.16E-02        | 6.93E-02        | <b>3.44E-02</b> | 1.45E-01 | 5.82E-01 |
| rs11088210       | LINC00159                      | <b>3.74E-04</b> | <b>6.48E-04</b> | 6.39E-02        | <b>2.12E-02</b> | <b>3.68E-02</b> | <b>1.40E-02</b> | 8.15E-02        | 6.91E-02        | <b>3.45E-02</b> | 1.45E-01 | 5.83E-01 |
| rs11088211       | LINC00159                      | <b>3.72E-04</b> | <b>6.47E-04</b> | 6.40E-02        | <b>2.12E-02</b> | <b>3.66E-02</b> | <b>1.39E-02</b> | 8.13E-02        | 6.87E-02        | <b>3.46E-02</b> | 1.45E-01 | 5.83E-01 |
| rs2833707        | LINC00159                      | <b>3.56E-04</b> | <b>6.40E-04</b> | 6.47E-02        | <b>2.13E-02</b> | <b>3.45E-02</b> | <b>1.30E-02</b> | 7.95E-02        | 6.58E-02        | <b>3.55E-02</b> | 1.48E-01 | 5.89E-01 |
| rs2833708        | LINC00159                      | <b>3.48E-04</b> | <b>6.37E-04</b> | 6.50E-02        | <b>2.13E-02</b> | <b>3.34E-02</b> | <b>1.25E-02</b> | 7.85E-02        | 6.42E-02        | <b>3.59E-02</b> | 1.49E-01 | 5.91E-01 |
| rs2833709        | LINC00159                      | <b>3.45E-04</b> | <b>6.36E-04</b> | 6.52E-02        | <b>2.14E-02</b> | <b>3.29E-02</b> | <b>1.23E-02</b> | 7.81E-02        | 6.35E-02        | <b>3.62E-02</b> | 1.50E-01 | 5.92E-01 |
| rs12482617       | LINC00159                      | <b>3.44E-04</b> | <b>6.36E-04</b> | 6.53E-02        | <b>2.14E-02</b> | <b>3.29E-02</b> | <b>1.22E-02</b> | 7.80E-02        | 6.34E-02        | <b>3.62E-02</b> | 1.50E-01 | 5.92E-01 |
| rs12482514       | LINC00159                      | <b>3.44E-04</b> | <b>6.36E-04</b> | 6.53E-02        | <b>2.14E-02</b> | <b>3.29E-02</b> | <b>1.22E-02</b> | 7.80E-02        | 6.34E-02        | <b>3.62E-02</b> | 1.50E-01 | 5.92E-01 |
| rs2833713        | LINC00159                      | <b>3.44E-04</b> | <b>6.35E-04</b> | 6.53E-02        | <b>2.14E-02</b> | <b>3.28E-02</b> | <b>1.22E-02</b> | 7.80E-02        | 6.33E-02        | <b>3.63E-02</b> | 1.51E-01 | 5.92E-01 |
| rs77148260       | LINC00159                      | <b>3.43E-04</b> | <b>6.35E-04</b> | 6.53E-02        | <b>2.14E-02</b> | <b>3.28E-02</b> | <b>1.22E-02</b> | 7.78E-02        | 6.31E-02        | <b>3.63E-02</b> | 1.51E-01 | 5.92E-01 |
| rs113442259      | LINC00159                      | <b>3.43E-04</b> | <b>6.35E-04</b> | 6.53E-02        | <b>2.14E-02</b> | <b>3.28E-02</b> | <b>1.22E-02</b> | 7.78E-02        | 6.31E-02        | <b>3.63E-02</b> | 1.51E-01 | 5.92E-01 |
| rs113213508      | LINC00159                      | <b>3.43E-04</b> | <b>6.35E-04</b> | 6.53E-02        | <b>2.14E-02</b> | <b>3.27E-02</b> | <b>1.22E-02</b> | 7.78E-02        | 6.31E-02        | <b>3.64E-02</b> | 1.51E-01 | 5.92E-01 |
| rs112075059      | LINC00159                      | <b>6.11E-04</b> | <b>1.15E-03</b> | <b>3.76E-02</b> | <b>1.21E-02</b> | <b>2.80E-02</b> | <b>8.74E-03</b> | 5.44E-02        | <b>4.86E-02</b> | <b>1.58E-02</b> | 1.01E-01 | 5.36E-01 |
| rs12483027       | LINC00159                      | <b>3.43E-04</b> | <b>6.35E-04</b> | 6.53E-02        | <b>2.14E-02</b> | <b>3.27E-02</b> | <b>1.22E-02</b> | 7.78E-02        | 6.31E-02        | <b>3.64E-02</b> | 1.51E-01 | 5.92E-01 |
| rs12483069       | LINC00159                      | <b>3.43E-04</b> | <b>6.35E-04</b> | 6.53E-02        | <b>2.14E-02</b> | <b>3.27E-02</b> | <b>1.22E-02</b> | 7.78E-02        | 6.30E-02        | <b>3.64E-02</b> | 1.51E-01 | 5.92E-01 |
| rs2833714        | LINC00159                      | <b>3.42E-04</b> | <b>6.35E-04</b> | 6.53E-02        | <b>2.14E-02</b> | <b>3.26E-02</b> | <b>1.21E-02</b> | 7.77E-02        | 6.30E-02        | <b>3.64E-02</b> | 1.51E-01 | 5.92E-01 |
| rs78098177       | LINC00159                      | <b>3.42E-04</b> | <b>6.35E-04</b> | 6.54E-02        | <b>2.14E-02</b> | <b>3.25E-02</b> | <b>1.21E-02</b> | 7.76E-02        | 6.27E-02        | <b>3.64E-02</b> | 1.51E-01 | 5.93E-01 |
| rs2833718        | LINC00159                      | <b>3.37E-04</b> | <b>6.33E-04</b> | 7.16E-02        | <b>2.32E-02</b> | <b>3.18E-02</b> | <b>1.14E-02</b> | 7.69E-02        | 6.17E-02        | <b>3.67E-02</b> | 1.52E-01 | 5.94E-01 |
| rs8128985        | LINC00159                      | <b>3.38E-04</b> | <b>6.34E-04</b> | 6.55E-02        | <b>2.14E-02</b> | <b>3.18E-02</b> | <b>1.18E-02</b> | 7.68E-02        | 6.17E-02        | <b>3.68E-02</b> | 1.52E-01 | 5.94E-01 |
| rs78794822       | LINC00159                      | <b>3.47E-04</b> | <b>6.42E-04</b> | 6.34E-02        | <b>2.14E-02</b> | <b>3.07E-02</b> | <b>1.14E-02</b> | 7.66E-02        | 6.16E-02        | <b>3.76E-02</b> | 1.55E-01 | 5.98E-01 |
| rs112412785      | LINC00159                      | <b>4.69E-04</b> | <b>1.11E-03</b> | 6.60E-02        | <b>2.00E-02</b> | 6.28E-02        | <b>2.20E-02</b> | 7.64E-02        | 6.15E-02        | <b>2.94E-02</b> | 1.43E-01 | 5.36E-01 |
| rs113561184      | LINC00159                      | <b>2.07E-04</b> | <b>5.30E-04</b> | <b>3.79E-02</b> | <b>1.16E-02</b> | <b>4.01E-02</b> | <b>1.01E-02</b> | 5.27E-02        | <b>3.75E-02</b> | <b>2.21E-02</b> | 1.09E-01 | 5.61E-01 |
| rs117578633      | LINC00159                      | <b>2.56E-04</b> | <b>5.82E-04</b> | <b>4.78E-02</b> | <b>1.57E-02</b> | <b>4.05E-02</b> | <b>1.04E-02</b> | 6.05E-02        | <b>4.57E-02</b> | <b>2.71E-02</b> | 1.21E-01 | 5.75E-01 |
| rs111282827      | LINC00159                      | <b>4.09E-04</b> | <b>1.11E-03</b> | 5.43E-02        | <b>1.57E-02</b> | 5.38E-02        | <b>1.93E-02</b> | <b>4.08E-02</b> | <b>4.26E-02</b> | <b>3.21E-02</b> | 1.54E-01 | 5.95E-01 |
| rs79779898       | LINC00159                      | <b>4.72E-04</b> | <b>1.11E-03</b> | 6.54E-02        | <b>2.00E-02</b> | 6.24E-02        | <b>2.19E-02</b> | 7.63E-02        | 6.15E-02        | <b>2.97E-02</b> | 1.44E-01 | 5.38E-01 |
| chr21:33569654:D | LINC00159                      | <b>4.62E-04</b> | <b>9.13E-04</b> | 7.62E-02        | <b>2.16E-02</b> | 6.34E-02        | <b>2.30E-02</b> | 1.00E-01        | 1.02E-01        | <b>2.79E-02</b> | 1.50E-01 | 6.60E-01 |
| rs2249432        | LINC00159-AP000265.1           | <b>1.06E-05</b> | <b>4.15E-05</b> | 6.94E-02        | <b>1.72E-02</b> | 2.42E-01        | 2.10E-01        | 2.66E-01        | 1.55E-01        | 1.80E-01        | 3.93E-01 | 5.12E-01 |
| rs8131083        | LINC00159-AP000265.1           | <b>1.12E-05</b> | <b>4.24E-05</b> | 7.42E-02        | <b>1.87E-02</b> | 2.41E-01        | 2.13E-01        | 2.68E-01        | 1.54E-01        | 1.76E-01        | 3.76E-01 | 4.95E-01 |
| rs16989309       | URB1                           | <b>4.53E-03</b> | <b>3.56E-02</b> | <b>6.30E-03</b> | <b>2.50E-03</b> | 4.60E-01        | 7.62E-01        | 1.12E-01        | 2.00E-01        | 3.63E-01        | 2.34E-01 | 5.05E-02 |
| rs111414152      | DIP2A                          | <b>2.01E-04</b> | <b>2.87E-03</b> | NA              | NA              | <b>1.92E-05</b> | <b>7.58E-04</b> | NA              | NA              | 7.88E-01        | 8.92E-01 | NA       |
| rs116214529      | DIP2A-S100B                    | <b>7.95E-05</b> | <b>3.31E-03</b> | NA              | NA              | <b>7.71E-05</b> | <b>1.31E-03</b> | NA              | NA              | 4.69E-01        | 9.39E-01 | NA       |
| rs186825689      | DIP2A-S100B                    | <b>7.87E-05</b> | <b>3.28E-03</b> | NA              | NA              | <b>7.71E-05</b> | <b>1.31E-03</b> | NA              | NA              | 4.69E-01        | 9.40E-01 | NA       |
| rs115728891      | S100B,S100B-PRMT2              | <b>1.11E-04</b> | <b>3.70E-03</b> | NA              | NA              | <b>1.37E-03</b> | <b>1.86E-02</b> | NA              | NA              | 4.77E-01        | 9.53E-01 | NA       |
| rs115266927      | S100B,S100B-PRMT2              | <b>1.51E-04</b> | <b>4.68E-03</b> | NA              | NA              | <b>1.37E-03</b> | <b>1.86E-02</b> | NA              | NA              | 4.78E-01        | 9.59E-01 | NA       |
| rs79229123       | S100B,S100B-PRMT2              | <b>1.58E-04</b> | <b>4.87E-03</b> | NA              | NA              | <b>1.37E-03</b> | <b>1.86E-02</b> | NA              | NA              | 4.77E-01        | 9.60E-01 | NA       |
| rs185614941      | S100B-PRMT2                    | <b>1.46E-04</b> | <b>4.68E-03</b> | NA              | NA              | <b>1.42E-03</b> | <b>1.94E-02</b> | NA              | NA              | 4.75E-01        | 9.64E-01 | NA       |
| chr22:26917069:  | C9.15,TPST2,CTA-445C9.14-CTA-4 | NA              | NA              | 1.28E-01        | 5.92E-02        | NA              | NA              | <b>3.15E-10</b> | <b>6.55E-05</b> | 5.95E-02        | 4.35E-01 | 7.69E-01 |
| rs4149485        | TPST2,CTA-445C9.15             | 2.45E-01        | 1.26E-01        | <b>4.82E-02</b> | <b>2.66E-02</b> | 2.21E-01        | 1.55E-01        | <b>2.24E-10</b> | <b>6.00E-05</b> | 5.03E-01        | 6.87E-01 | 2.59E-01 |



| EA       | Meta            |                 |                 |                 |                 |                 | Dir <sup>d</sup> | SNP              |
|----------|-----------------|-----------------|-----------------|-----------------|-----------------|-----------------|------------------|------------------|
|          | AA              | EA              | AA+EA           | EA              | AA+EA           | AA+EA           |                  |                  |
| Adj P    | Exp P           | Adj P           | Exp P           | Adj P           | Exp P           | Adj P           |                  |                  |
| 9.16E-01 | <b>8.06E-06</b> | <b>1.31E-03</b> | 8.88E-01        | <b>1.31E-03</b> | <b>6.77E-03</b> | <b>1.31E-03</b> | ----++           | rs10782635       |
| 9.16E-01 | <b>8.03E-06</b> | <b>1.30E-03</b> | 8.89E-01        | <b>1.30E-03</b> | <b>6.76E-03</b> | <b>1.30E-03</b> | ----+-           | rs10873920       |
| 1.63E-01 | <b>9.82E-06</b> | <b>2.68E-03</b> | NA              | <b>2.68E-03</b> | <b>1.08E-05</b> | <b>2.68E-03</b> | +x+x-x           | chr1:212183114:! |
| 2.25E-01 | <b>9.69E-07</b> | <b>2.13E-04</b> | NA              | <b>2.13E-04</b> | <b>1.09E-06</b> | <b>2.13E-04</b> | +x+x-x           | rs141482228      |
| 1.86E-01 | <b>2.50E-06</b> | <b>1.33E-03</b> | NA              | <b>1.33E-03</b> | <b>2.77E-06</b> | <b>1.33E-03</b> | +x+x+x           | rs77349458       |
| 6.04E-02 | <b>8.29E-06</b> | <b>6.30E-04</b> | NA              | <b>6.30E-04</b> | <b>9.12E-06</b> | <b>6.30E-04</b> | +x+xxx           | rs78450308       |
| NA       | <b>7.17E-06</b> | <b>1.51E-05</b> | NA              | <b>1.51E-05</b> | <b>7.90E-06</b> | <b>1.51E-05</b> | +x+x+x           | rs147434712      |
| NA       | <b>2.25E-06</b> | <b>6.24E-05</b> | NA              | <b>6.24E-05</b> | <b>2.50E-06</b> | <b>6.24E-05</b> | +x+xxx           | rs114383460      |
| NA       | <b>2.25E-06</b> | <b>6.26E-05</b> | NA              | <b>6.26E-05</b> | <b>2.51E-06</b> | <b>6.26E-05</b> | +x+xxx           | rs115913953      |
| NA       | <b>2.32E-06</b> | <b>6.45E-05</b> | NA              | <b>6.45E-05</b> | <b>2.58E-06</b> | <b>6.45E-05</b> | +x+xxx           | rs115427433      |
| 7.36E-01 | <b>6.21E-06</b> | <b>3.28E-02</b> | 4.77E-01        | <b>3.28E-02</b> | <b>8.45E-03</b> | <b>3.28E-02</b> | -+---            | rs73930448       |
| NA       | <b>1.70E-06</b> | <b>2.48E-04</b> | NA              | <b>2.48E-04</b> | <b>1.90E-06</b> | <b>2.48E-04</b> | +x+xxx           | rs77448142       |
| 4.40E-01 | 7.44E-01        | <b>1.20E-03</b> | <b>6.41E-06</b> | <b>1.20E-03</b> | <b>6.99E-04</b> | <b>1.20E-03</b> | +++++            | rs192238154      |
| 6.07E-01 | 9.70E-01        | <b>4.67E-03</b> | <b>5.43E-06</b> | <b>4.67E-03</b> | <b>1.88E-03</b> | <b>4.67E-03</b> | +++++            | rs74261103       |
| 6.22E-01 | 6.72E-01        | <b>2.43E-03</b> | <b>6.48E-06</b> | <b>2.43E-03</b> | <b>7.50E-04</b> | <b>2.43E-03</b> | +++++            | rs13386612       |
| 6.18E-01 | 6.63E-01        | <b>2.32E-03</b> | <b>6.21E-06</b> | <b>2.32E-03</b> | <b>7.08E-04</b> | <b>2.32E-03</b> | +++++            | rs10181488       |
| 5.01E-01 | 9.54E-01        | <b>3.73E-03</b> | <b>6.55E-06</b> | <b>3.73E-03</b> | <b>2.30E-03</b> | <b>3.73E-03</b> | +++++            | rs1487036        |
| 4.35E-01 | 8.21E-01        | <b>5.67E-03</b> | <b>5.90E-06</b> | <b>5.67E-03</b> | <b>2.78E-03</b> | <b>5.67E-03</b> | +++++            | rs2129493        |
| 4.52E-01 | 7.99E-01        | <b>9.25E-03</b> | <b>8.84E-06</b> | <b>9.25E-03</b> | <b>3.71E-03</b> | <b>9.25E-03</b> | +++++            | rs1872786        |
| 4.77E-01 | 7.69E-01        | <b>9.46E-03</b> | <b>7.97E-06</b> | <b>9.46E-03</b> | <b>3.81E-03</b> | <b>9.46E-03</b> | +++++            | rs1872787        |
| 4.83E-01 | 7.90E-01        | <b>1.01E-02</b> | <b>7.97E-06</b> | <b>1.01E-02</b> | <b>3.90E-03</b> | <b>1.01E-02</b> | +++++            | rs12617011       |
| 9.28E-01 | 6.74E-01        | <b>5.49E-03</b> | <b>2.63E-06</b> | <b>5.49E-03</b> | <b>3.90E-04</b> | <b>5.49E-03</b> | ++++-            | rs12621150       |
| 8.00E-01 | 8.97E-01        | <b>1.16E-02</b> | <b>9.08E-06</b> | <b>1.16E-02</b> | <b>5.77E-03</b> | <b>1.16E-02</b> | ++++-            | rs2901857        |
| 7.94E-01 | 8.89E-01        | <b>1.15E-02</b> | <b>8.67E-06</b> | <b>1.15E-02</b> | <b>5.76E-03</b> | <b>1.15E-02</b> | ++++-            | rs1979560        |
| NA       | <b>1.43E-06</b> | <b>2.01E-06</b> | NA              | <b>2.01E-06</b> | <b>1.60E-06</b> | <b>2.01E-06</b> | +x+x+x           | rs144605126      |
| NA       | <b>7.31E-06</b> | <b>1.08E-05</b> | NA              | <b>1.08E-05</b> | <b>8.05E-06</b> | <b>1.08E-05</b> | +x+x+x           | rs115750691      |
| NA       | <b>2.52E-06</b> | <b>8.71E-05</b> | NA              | <b>8.71E-05</b> | <b>2.80E-06</b> | <b>8.71E-05</b> | +x+x+x           | rs75966817       |
| NA       | <b>2.35E-07</b> | <b>3.05E-06</b> | NA              | <b>3.05E-06</b> | <b>2.67E-07</b> | <b>3.05E-06</b> | +x+x+x           | rs77627012       |
| NA       | <b>2.00E-07</b> | <b>2.44E-06</b> | NA              | <b>2.44E-06</b> | <b>2.27E-07</b> | <b>2.44E-06</b> | +x+x+x           | rs113582837      |
| NA       | <b>1.33E-07</b> | <b>1.67E-06</b> | NA              | <b>1.67E-06</b> | <b>1.52E-07</b> | <b>1.67E-06</b> | +x+x+x           | rs115195999      |
| NA       | <b>1.91E-06</b> | <b>2.54E-05</b> | NA              | <b>2.54E-05</b> | <b>2.13E-06</b> | <b>2.54E-05</b> | +x+x+x           | rs74950612       |
| NA       | <b>1.95E-07</b> | <b>2.81E-06</b> | NA              | <b>2.81E-06</b> | <b>2.22E-07</b> | <b>2.81E-06</b> | +x+x+x           | rs76850313       |
| NA       | <b>4.71E-06</b> | <b>1.13E-04</b> | NA              | <b>1.13E-04</b> | <b>5.21E-06</b> | <b>1.13E-04</b> | +x+xxx           | rs115645716      |
| NA       | <b>9.65E-07</b> | <b>2.86E-05</b> | NA              | <b>2.86E-05</b> | <b>1.08E-06</b> | <b>2.86E-05</b> | +x+xxx           | rs138518560      |
| NA       | <b>3.18E-06</b> | <b>8.52E-05</b> | NA              | <b>8.52E-05</b> | <b>3.53E-06</b> | <b>8.52E-05</b> | +x+x+x           | rs116479873      |
| NA       | <b>3.06E-06</b> | <b>1.10E-04</b> | NA              | <b>1.10E-04</b> | <b>3.39E-06</b> | <b>1.10E-04</b> | +x+x+x           | rs150064803      |
| NA       | <b>9.56E-06</b> | <b>8.66E-05</b> | NA              | <b>8.66E-05</b> | <b>1.05E-05</b> | <b>8.66E-05</b> | +x+x+x           | rs116622675      |
| NA       | <b>9.06E-06</b> | <b>4.14E-04</b> | NA              | <b>4.14E-04</b> | <b>9.96E-06</b> | <b>4.14E-04</b> | +x+x+x           | rs73947458       |
| NA       | <b>5.97E-06</b> | <b>2.89E-04</b> | NA              | <b>2.89E-04</b> | <b>6.58E-06</b> | <b>2.89E-04</b> | +x+xxx           | rs57275972       |
| NA       | <b>1.51E-07</b> | <b>1.99E-05</b> | NA              | <b>1.99E-05</b> | <b>1.72E-07</b> | <b>1.99E-05</b> | +x+xxx           | rs143020225      |
| NA       | <b>3.00E-06</b> | <b>1.20E-04</b> | NA              | <b>1.20E-04</b> | <b>3.33E-06</b> | <b>1.20E-04</b> | +x+xxx           | rs112945476      |
| NA       | <b>2.84E-06</b> | <b>1.12E-04</b> | NA              | <b>1.12E-04</b> | <b>3.15E-06</b> | <b>1.12E-04</b> | +x+xxx           | rs111415017      |
| NA       | <b>2.44E-06</b> | <b>1.06E-04</b> | NA              | <b>1.06E-04</b> | <b>2.72E-06</b> | <b>1.06E-04</b> | +x+xxx           | rs113283978      |

|                 |                 |                 |                 |                 |                 |                 |        |                  |
|-----------------|-----------------|-----------------|-----------------|-----------------|-----------------|-----------------|--------|------------------|
| NA              | <b>2.86E-06</b> | <b>1.15E-04</b> | NA              | <b>1.15E-04</b> | <b>3.18E-06</b> | <b>1.15E-04</b> | +x+xx  | chr2:167235049:D |
| NA              | <b>2.81E-06</b> | <b>1.13E-04</b> | NA              | <b>1.13E-04</b> | <b>3.12E-06</b> | <b>1.13E-04</b> | +x+xx  | rs112047299      |
| NA              | <b>3.56E-07</b> | <b>2.74E-05</b> | NA              | <b>2.74E-05</b> | <b>4.03E-07</b> | <b>2.74E-05</b> | +x+xx  | chr2:167239818:D |
| NA              | <b>3.04E-06</b> | <b>1.26E-04</b> | NA              | <b>1.26E-04</b> | <b>3.38E-06</b> | <b>1.26E-04</b> | +x+xx  | rs57862846       |
| NA              | <b>3.27E-06</b> | <b>1.38E-04</b> | NA              | <b>1.38E-04</b> | <b>3.63E-06</b> | <b>1.38E-04</b> | +x+xx  | rs75884187       |
| NA              | <b>3.26E-06</b> | <b>1.39E-04</b> | NA              | <b>1.39E-04</b> | <b>3.61E-06</b> | <b>1.39E-04</b> | +x+xx  | rs6432911        |
| 7.65E-02        | 3.82E-01        | <b>1.16E-02</b> | <b>9.47E-06</b> | <b>1.16E-02</b> | <b>3.85E-03</b> | <b>1.16E-02</b> | +--++  | rs16856071       |
| 7.13E-01        | NA              | <b>4.50E-04</b> | <b>6.52E-06</b> | <b>4.50E-04</b> | <b>7.55E-06</b> | <b>4.50E-04</b> | x+x+xx | rs77921320       |
| NA              | <b>9.25E-06</b> | <b>1.29E-03</b> | NA              | <b>1.29E-03</b> | <b>1.02E-05</b> | <b>1.29E-03</b> | +x+xx  | rs74002562       |
| 2.72E-01        | <b>2.00E-03</b> | <b>1.26E-03</b> | <b>1.31E-03</b> | <b>1.26E-03</b> | <b>9.82E-06</b> | <b>1.26E-03</b> | +++++  | rs4684628        |
| NA              | <b>7.39E-07</b> | <b>5.96E-08</b> | NA              | <b>5.96E-08</b> | <b>8.30E-07</b> | <b>5.96E-08</b> | xx+x+x | rs150728868      |
| 6.19E-01        | <b>8.37E-06</b> | <b>2.03E-03</b> | 3.80E-01        | <b>2.03E-03</b> | <b>1.06E-02</b> | <b>2.03E-03</b> | x+++++ | rs80329973       |
| 2.26E-01        | <b>5.50E-06</b> | <b>2.70E-02</b> | 2.02E-01        | <b>2.70E-02</b> | <b>2.88E-02</b> | <b>2.70E-02</b> | +----+ | rs811810         |
| 4.34E-01        | <b>7.75E-06</b> | <b>3.34E-02</b> | 1.63E-01        | <b>3.34E-02</b> | <b>3.99E-02</b> | <b>3.34E-02</b> | +--++  | rs774804         |
| 2.68E-01        | <b>5.64E-06</b> | <b>2.64E-02</b> | 1.95E-01        | <b>2.64E-02</b> | <b>3.03E-02</b> | <b>2.64E-02</b> | +----+ | rs774805         |
| 2.28E-01        | <b>8.24E-06</b> | <b>2.91E-02</b> | 2.06E-01        | <b>2.91E-02</b> | <b>3.28E-02</b> | <b>2.91E-02</b> | +----+ | rs2622700        |
| NA              | <b>1.13E-08</b> | <b>1.05E-06</b> | NA              | <b>1.05E-06</b> | <b>1.32E-08</b> | <b>1.05E-06</b> | +x+x+x | rs143244591      |
| NA              | <b>5.38E-06</b> | <b>2.98E-06</b> | NA              | <b>2.98E-06</b> | <b>5.94E-06</b> | <b>2.98E-06</b> | -x-xxx | rs139793347      |
| <b>4.91E-04</b> | 6.32E-01        | <b>1.07E-03</b> | <b>6.02E-06</b> | <b>1.07E-03</b> | <b>2.59E-03</b> | <b>1.07E-03</b> | +++++  | rs4912498        |
| 5.16E-01        | 4.81E-01        | <b>1.54E-03</b> | <b>5.36E-07</b> | <b>1.54E-03</b> | <b>4.92E-06</b> | <b>1.54E-03</b> | +----  | rs10939037       |
| 5.11E-01        | 4.85E-01        | <b>1.53E-03</b> | <b>7.65E-07</b> | <b>1.53E-03</b> | <b>6.50E-06</b> | <b>1.53E-03</b> | +----  | rs10939038       |
| 5.34E-01        | <b>4.36E-02</b> | <b>4.66E-03</b> | <b>5.14E-05</b> | <b>4.66E-03</b> | <b>7.01E-06</b> | <b>4.66E-03</b> | +++++  | rs73252531       |
| 7.22E-01        | 4.92E-01        | <b>1.06E-02</b> | <b>4.97E-06</b> | <b>1.06E-02</b> | <b>1.07E-04</b> | <b>1.06E-02</b> | +----  | rs11937742       |
| 3.89E-01        | 9.97E-01        | <b>2.26E-02</b> | <b>9.84E-06</b> | <b>2.26E-02</b> | <b>2.47E-04</b> | <b>2.26E-02</b> | +----  | chr4:25163774:I  |
| 3.06E-01        | 9.42E-01        | <b>2.31E-02</b> | <b>6.61E-06</b> | <b>2.31E-02</b> | <b>2.28E-04</b> | <b>2.31E-02</b> | +----  | chr4:25163777:I  |
| 3.94E-01        | NA              | <b>5.69E-04</b> | <b>7.91E-07</b> | <b>5.69E-04</b> | <b>9.41E-07</b> | <b>5.69E-04</b> | x+x+x+ | rs73252534       |
| 7.13E-01        | 4.95E-01        | <b>1.06E-02</b> | <b>4.66E-06</b> | <b>1.06E-02</b> | <b>1.04E-04</b> | <b>1.06E-02</b> | +----  | rs12498160       |
| 3.95E-01        | NA              | <b>5.61E-04</b> | <b>7.89E-07</b> | <b>5.61E-04</b> | <b>9.39E-07</b> | <b>5.61E-04</b> | x+x+x+ | rs73252535       |
| 3.96E-01        | NA              | <b>5.40E-04</b> | <b>7.68E-07</b> | <b>5.40E-04</b> | <b>9.15E-07</b> | <b>5.40E-04</b> | x+x+x+ | rs73252537       |
| 3.87E-01        | NA              | <b>4.96E-04</b> | <b>6.85E-07</b> | <b>4.96E-04</b> | <b>8.17E-07</b> | <b>4.96E-04</b> | x+x+x+ | rs73252538       |
| 4.30E-01        | NA              | <b>6.85E-04</b> | <b>1.62E-06</b> | <b>6.85E-04</b> | <b>1.90E-06</b> | <b>6.85E-04</b> | x+x+x+ | rs73252540       |
| 5.28E-01        | <b>1.15E-03</b> | <b>7.61E-05</b> | <b>4.40E-06</b> | <b>7.61E-05</b> | <b>2.98E-08</b> | <b>7.61E-05</b> | +++++  | rs147170184      |
| 5.29E-01        | <b>3.00E-02</b> | <b>3.50E-04</b> | <b>4.42E-06</b> | <b>3.50E-04</b> | <b>4.69E-07</b> | <b>3.50E-04</b> | +++++  | rs147364487      |
| 3.41E-01        | NA              | <b>8.72E-04</b> | <b>2.12E-06</b> | <b>8.72E-04</b> | <b>2.49E-06</b> | <b>8.72E-04</b> | x+x+x+ | rs73252544       |
| 5.26E-01        | <b>1.85E-03</b> | <b>7.28E-05</b> | <b>4.49E-06</b> | <b>7.28E-05</b> | <b>4.39E-08</b> | <b>7.28E-05</b> | +++++  | rs141771882      |
| 5.28E-01        | <b>1.36E-03</b> | <b>8.81E-05</b> | <b>4.77E-06</b> | <b>8.81E-05</b> | <b>3.65E-08</b> | <b>8.81E-05</b> | +++++  | rs115472754      |
| 5.29E-01        | <b>2.02E-03</b> | <b>9.46E-05</b> | <b>4.93E-06</b> | <b>9.46E-05</b> | <b>5.13E-08</b> | <b>9.46E-05</b> | +++++  | rs115579188      |
| 5.29E-01        | <b>1.25E-03</b> | <b>8.74E-05</b> | <b>4.94E-06</b> | <b>8.74E-05</b> | <b>3.57E-08</b> | <b>8.74E-05</b> | +++++  | rs73252547       |
| 5.30E-01        | <b>1.26E-03</b> | <b>8.87E-05</b> | <b>5.00E-06</b> | <b>8.87E-05</b> | <b>3.64E-08</b> | <b>8.87E-05</b> | +++++  | rs55974734       |
| 5.30E-01        | <b>1.27E-03</b> | <b>8.89E-05</b> | <b>5.00E-06</b> | <b>8.89E-05</b> | <b>3.64E-08</b> | <b>8.89E-05</b> | +++++  | rs73252548       |
| 5.30E-01        | <b>1.27E-03</b> | <b>8.98E-05</b> | <b>5.05E-06</b> | <b>8.98E-05</b> | <b>3.69E-08</b> | <b>8.98E-05</b> | +++++  | chr4:25198751:D  |
| 3.42E-01        | NA              | <b>9.34E-04</b> | <b>2.34E-06</b> | <b>9.34E-04</b> | <b>2.74E-06</b> | <b>9.34E-04</b> | x+x+x+ | rs73252549       |
| 3.42E-01        | NA              | <b>9.38E-04</b> | <b>2.35E-06</b> | <b>9.38E-04</b> | <b>2.75E-06</b> | <b>9.38E-04</b> | x+x+x+ | rs73252550       |
| 3.42E-01        | NA              | <b>9.48E-04</b> | <b>2.38E-06</b> | <b>9.48E-04</b> | <b>2.80E-06</b> | <b>9.48E-04</b> | x+x+x+ | rs73252551       |
| 5.30E-01        | <b>1.08E-03</b> | <b>9.11E-05</b> | <b>5.28E-06</b> | <b>9.11E-05</b> | <b>3.37E-08</b> | <b>9.11E-05</b> | +++++  | rs73252553       |
| 5.30E-01        | <b>1.08E-03</b> | <b>9.33E-05</b> | <b>5.43E-06</b> | <b>9.33E-05</b> | <b>3.46E-08</b> | <b>9.33E-05</b> | +++++  | chr4:25202768:I  |

|          |                 |                 |                 |                 |                 |                 |        |                 |
|----------|-----------------|-----------------|-----------------|-----------------|-----------------|-----------------|--------|-----------------|
| 5.31E-01 | <b>1.06E-03</b> | <b>9.61E-05</b> | <b>5.67E-06</b> | <b>9.61E-05</b> | <b>3.56E-08</b> | <b>9.61E-05</b> | +++++  | rs73252554      |
| 5.83E-01 | <b>1.78E-03</b> | <b>1.85E-04</b> | <b>8.38E-06</b> | <b>1.85E-04</b> | <b>8.18E-08</b> | <b>1.85E-04</b> | +++++  | rs73252555      |
| 3.85E-01 | NA              | <b>1.37E-03</b> | <b>3.92E-06</b> | <b>1.37E-03</b> | <b>4.57E-06</b> | <b>1.37E-03</b> | x+x+x+ | rs73252556      |
| 5.84E-01 | <b>1.78E-03</b> | <b>1.86E-04</b> | <b>8.40E-06</b> | <b>1.86E-04</b> | <b>8.20E-08</b> | <b>1.86E-04</b> | +++++  | rs55638051      |
| 5.84E-01 | <b>1.79E-03</b> | <b>1.87E-04</b> | <b>8.44E-06</b> | <b>1.87E-04</b> | <b>8.27E-08</b> | <b>1.87E-04</b> | +++++  | rs73252557      |
| 5.83E-01 | <b>1.75E-03</b> | <b>2.01E-04</b> | <b>9.45E-06</b> | <b>2.01E-04</b> | <b>9.09E-08</b> | <b>2.01E-04</b> | +++++  | rs424573        |
| 5.84E-01 | <b>1.74E-03</b> | <b>2.02E-04</b> | <b>9.56E-06</b> | <b>2.02E-04</b> | <b>9.20E-08</b> | <b>2.02E-04</b> | +++++  | rs409131        |
| 5.84E-01 | <b>1.74E-03</b> | <b>2.16E-04</b> | <b>1.05E-05</b> | <b>2.16E-04</b> | <b>1.01E-07</b> | <b>2.16E-04</b> | +++++  | rs313574        |
| 8.38E-01 | <b>7.04E-03</b> | <b>1.07E-03</b> | <b>1.69E-04</b> | <b>1.07E-03</b> | <b>4.48E-06</b> | <b>1.07E-03</b> | +++++  | rs313573        |
| 5.84E-01 | <b>1.69E-03</b> | <b>2.19E-04</b> | <b>1.07E-05</b> | <b>2.19E-04</b> | <b>1.00E-07</b> | <b>2.19E-04</b> | +++++  | rs313570        |
| 5.94E-01 | <b>5.21E-03</b> | <b>4.07E-04</b> | <b>1.08E-05</b> | <b>4.07E-04</b> | <b>2.26E-07</b> | <b>4.07E-04</b> | +++++  | rs313569        |
| 5.80E-01 | <b>1.94E-03</b> | <b>2.24E-04</b> | <b>1.05E-05</b> | <b>2.24E-04</b> | <b>1.09E-07</b> | <b>2.24E-04</b> | +++++  | rs313579        |
| 9.12E-01 | <b>1.38E-03</b> | <b>5.61E-04</b> | <b>1.88E-04</b> | <b>5.61E-04</b> | <b>1.15E-06</b> | <b>5.61E-04</b> | +++++  | rs313578        |
| 9.16E-01 | <b>1.08E-03</b> | <b>4.41E-04</b> | <b>1.89E-04</b> | <b>4.41E-04</b> | <b>9.40E-07</b> | <b>4.41E-04</b> | +++++  | rs313576        |
| 3.87E-01 | NA              | <b>1.63E-03</b> | <b>5.54E-06</b> | <b>1.63E-03</b> | <b>6.43E-06</b> | <b>1.63E-03</b> | x+x+x+ | rs313575        |
| 4.61E-01 | <b>1.02E-02</b> | <b>2.48E-04</b> | <b>3.56E-06</b> | <b>2.48E-04</b> | <b>3.03E-07</b> | <b>2.48E-04</b> | +++++  | rs3115231       |
| 5.86E-01 | <b>9.85E-04</b> | <b>1.76E-04</b> | <b>1.17E-05</b> | <b>1.76E-04</b> | <b>7.29E-08</b> | <b>1.76E-04</b> | +++++  | rs188759        |
| 7.12E-01 | <b>2.73E-04</b> | <b>1.01E-04</b> | <b>1.29E-04</b> | <b>1.01E-04</b> | <b>1.58E-07</b> | <b>1.01E-04</b> | +++++  | rs313547        |
| 6.64E-01 | <b>9.76E-04</b> | <b>1.00E-04</b> | <b>2.47E-05</b> | <b>1.00E-04</b> | <b>1.04E-07</b> | <b>1.00E-04</b> | +++++  | rs313544        |
| 6.67E-01 | <b>1.07E-03</b> | <b>1.08E-04</b> | <b>2.45E-05</b> | <b>1.08E-04</b> | <b>1.13E-07</b> | <b>1.08E-04</b> | +++++  | rs313553        |
| 3.87E-01 | NA              | <b>2.09E-03</b> | <b>7.55E-06</b> | <b>2.09E-03</b> | <b>8.72E-06</b> | <b>2.09E-03</b> | x+x+x+ | rs183170687     |
| 5.95E-01 | <b>1.06E-02</b> | <b>3.29E-04</b> | <b>2.36E-05</b> | <b>3.29E-04</b> | <b>9.95E-07</b> | <b>3.29E-04</b> | +++++  | rs313560        |
| 2.72E-01 | 3.43E-01        | <b>1.70E-03</b> | <b>4.36E-06</b> | <b>1.70E-03</b> | <b>6.44E-06</b> | <b>1.70E-03</b> | +++++  | rs313566        |
| 5.56E-01 | <b>9.39E-04</b> | <b>2.21E-04</b> | <b>1.56E-05</b> | <b>2.21E-04</b> | <b>9.55E-08</b> | <b>2.21E-04</b> | +++++  | rs313536        |
| 5.13E-02 | NA              | <b>1.40E-04</b> | <b>6.46E-08</b> | <b>1.40E-04</b> | <b>7.96E-08</b> | <b>1.40E-04</b> | x-x+x+ | rs313542        |
| 3.55E-01 | NA              | <b>1.74E-03</b> | <b>7.59E-06</b> | <b>1.74E-03</b> | <b>8.77E-06</b> | <b>1.74E-03</b> | x+x+x+ | rs313540        |
| 5.45E-01 | <b>1.23E-03</b> | <b>2.28E-04</b> | <b>1.42E-05</b> | <b>2.28E-04</b> | <b>1.05E-07</b> | <b>2.28E-04</b> | +++++  | rs313539        |
| 5.45E-01 | <b>1.26E-03</b> | <b>2.31E-04</b> | <b>1.42E-05</b> | <b>2.31E-04</b> | <b>1.08E-07</b> | <b>2.31E-04</b> | +++++  | rs313538        |
| 5.44E-01 | <b>2.42E-03</b> | <b>3.49E-04</b> | <b>1.72E-05</b> | <b>3.49E-04</b> | <b>2.18E-07</b> | <b>3.49E-04</b> | +++++  | rs3115232       |
| 4.29E-01 | 6.90E-02        | <b>3.36E-03</b> | <b>1.59E-05</b> | <b>3.36E-03</b> | <b>3.28E-06</b> | <b>3.36E-03</b> | ++++x+ | rs180854188     |
| 5.44E-01 | <b>1.52E-03</b> | <b>2.73E-04</b> | <b>1.58E-05</b> | <b>2.73E-04</b> | <b>1.39E-07</b> | <b>2.73E-04</b> | +++++  | rs313533        |
| 3.92E-01 | <b>7.62E-05</b> | <b>6.59E-04</b> | <b>7.15E-04</b> | <b>6.59E-04</b> | <b>7.59E-07</b> | <b>6.59E-04</b> | +--x-  | rs12511593      |
| 6.56E-01 | <b>1.23E-04</b> | <b>9.02E-05</b> | <b>6.21E-05</b> | <b>9.02E-05</b> | <b>8.44E-08</b> | <b>9.02E-05</b> | ---x-  | rs7689780       |
| 3.67E-01 | NA              | <b>2.11E-03</b> | <b>9.70E-06</b> | <b>2.11E-03</b> | <b>1.12E-05</b> | <b>2.11E-03</b> | x-x-x- | rs10433834      |
| 3.67E-01 | NA              | <b>2.13E-03</b> | <b>9.52E-06</b> | <b>2.13E-03</b> | <b>1.10E-05</b> | <b>2.13E-03</b> | x-x-x- | rs1818426       |
| 3.67E-01 | NA              | <b>2.12E-03</b> | <b>9.70E-06</b> | <b>2.12E-03</b> | <b>1.12E-05</b> | <b>2.12E-03</b> | x-x-x- | rs9884670       |
| 2.72E-01 | 1.44E-01        | <b>2.24E-03</b> | <b>9.09E-06</b> | <b>2.24E-03</b> | <b>3.56E-06</b> | <b>2.24E-03</b> | x----  | chr4:25289189:l |
| 3.79E-01 | NA              | <b>2.10E-03</b> | <b>9.29E-06</b> | <b>2.10E-03</b> | <b>1.07E-05</b> | <b>2.10E-03</b> | x-x-x- | rs4697558       |
| 4.68E-01 | 2.85E-01        | <b>4.87E-03</b> | <b>6.11E-06</b> | <b>4.87E-03</b> | <b>9.10E-05</b> | <b>4.87E-03</b> | ----+  | rs316804        |
| 6.17E-01 | <b>6.56E-03</b> | <b>1.87E-03</b> | <b>1.79E-04</b> | <b>1.87E-03</b> | <b>4.36E-06</b> | <b>1.87E-03</b> | -----  | rs316776        |
| 6.14E-01 | <b>6.53E-03</b> | <b>1.73E-03</b> | <b>1.67E-04</b> | <b>1.73E-03</b> | <b>4.09E-06</b> | <b>1.73E-03</b> | -----  | rs316777        |
| 4.68E-01 | <b>6.10E-03</b> | <b>1.59E-03</b> | <b>1.66E-04</b> | <b>1.59E-03</b> | <b>3.78E-06</b> | <b>1.59E-03</b> | -----  | rs315684        |
| 4.27E-01 | <b>1.02E-02</b> | <b>3.16E-03</b> | <b>2.59E-04</b> | <b>3.16E-03</b> | <b>9.51E-06</b> | <b>3.16E-03</b> | -----+ | rs315682        |
| 9.92E-01 | 5.41E-01        | <b>8.22E-03</b> | <b>7.17E-06</b> | <b>8.22E-03</b> | <b>4.62E-04</b> | <b>8.22E-03</b> | ----+  | rs4697570       |
| NA       | <b>3.78E-06</b> | <b>1.35E-02</b> | 8.11E-01        | <b>1.35E-02</b> | <b>4.18E-03</b> | <b>1.35E-02</b> | +++xx  | rs6824813       |
| NA       | <b>2.99E-06</b> | <b>7.74E-05</b> | NA              | <b>7.74E-05</b> | <b>3.32E-06</b> | <b>7.74E-05</b> | +x+x+x | rs10000269      |

|                 |                 |                 |                 |                 |                 |                 |        |                  |
|-----------------|-----------------|-----------------|-----------------|-----------------|-----------------|-----------------|--------|------------------|
| NA              | <b>7.50E-07</b> | <b>2.97E-05</b> | NA              | <b>2.97E-05</b> | <b>8.43E-07</b> | <b>2.97E-05</b> | +x+x+x | rs28651948       |
| NA              | <b>6.24E-07</b> | <b>2.65E-05</b> | NA              | <b>2.65E-05</b> | <b>7.02E-07</b> | <b>2.65E-05</b> | +x+x+x | rs139968109      |
| 3.81E-01        | <b>3.60E-07</b> | <b>7.25E-05</b> | 1.28E-01        | <b>7.25E-05</b> | <b>2.26E-06</b> | <b>7.25E-05</b> | +++++  | rs28595532       |
| 3.45E-01        | <b>8.31E-07</b> | <b>8.37E-05</b> | 9.28E-02        | <b>8.37E-05</b> | <b>1.59E-06</b> | <b>8.37E-05</b> | +++++  | rs11098451       |
| NA              | <b>2.90E-06</b> | <b>6.19E-06</b> | NA              | <b>6.19E-06</b> | <b>3.22E-06</b> | <b>6.19E-06</b> | +xxx+x | chr4:124629474:D |
| <b>6.10E-03</b> | <b>1.20E-03</b> | <b>2.10E-06</b> | <b>1.66E-03</b> | <b>2.10E-06</b> | <b>9.58E-06</b> | <b>2.10E-06</b> | +++++  | rs4572830        |
| <b>4.78E-03</b> | <b>2.32E-04</b> | <b>5.77E-07</b> | <b>2.01E-03</b> | <b>5.77E-07</b> | <b>4.46E-06</b> | <b>5.77E-07</b> | +++++  | rs13140317       |
| <b>3.80E-03</b> | <b>6.63E-05</b> | <b>1.55E-07</b> | <b>1.66E-03</b> | <b>1.55E-07</b> | <b>1.30E-06</b> | <b>1.55E-07</b> | +++++  | rs12508887       |
| <b>6.58E-03</b> | <b>2.00E-04</b> | <b>1.78E-06</b> | <b>3.28E-03</b> | <b>1.78E-06</b> | <b>5.44E-06</b> | <b>1.78E-06</b> | +++++  | rs13125630       |
| NA              | <b>4.38E-06</b> | <b>1.50E-05</b> | NA              | <b>1.50E-05</b> | <b>4.85E-06</b> | <b>1.50E-05</b> | +x+x+x | rs79623836       |
| NA              | <b>6.75E-06</b> | <b>1.94E-05</b> | NA              | <b>1.94E-05</b> | <b>7.44E-06</b> | <b>1.94E-05</b> | +x+x+x | rs116226119      |
| NA              | <b>1.54E-06</b> | <b>5.30E-06</b> | NA              | <b>5.30E-06</b> | <b>1.72E-06</b> | <b>5.30E-06</b> | +x+x+x | rs114311699      |
| 6.94E-01        | <b>3.05E-03</b> | <b>1.86E-04</b> | <b>4.79E-04</b> | <b>1.86E-04</b> | <b>8.42E-06</b> | <b>1.86E-04</b> | +++++  | rs62352163       |
| 5.80E-02        | <b>6.42E-06</b> | <b>2.14E-03</b> | 2.36E-01        | <b>2.14E-03</b> | <b>4.84E-04</b> | <b>2.14E-03</b> | +++x+  | rs4704367        |
| NA              | <b>8.95E-06</b> | <b>5.29E-04</b> | NA              | <b>5.29E-04</b> | <b>9.84E-06</b> | <b>5.29E-04</b> | +xxx+x | rs74704845       |
| NA              | <b>5.20E-06</b> | <b>3.10E-04</b> | NA              | <b>3.10E-04</b> | <b>5.75E-06</b> | <b>3.10E-04</b> | +x+xxx | rs2033454        |
| NA              | <b>7.12E-06</b> | <b>2.44E-04</b> | NA              | <b>2.44E-04</b> | <b>7.84E-06</b> | <b>2.44E-04</b> | +x+xxx | rs73323306       |
| 1.56E-01        | <b>2.99E-03</b> | <b>1.42E-06</b> | <b>1.50E-04</b> | <b>1.42E-06</b> | <b>1.74E-06</b> | <b>1.42E-06</b> | ++++x+ | rs2878892        |
| NA              | <b>1.76E-06</b> | <b>1.68E-04</b> | NA              | <b>1.68E-04</b> | <b>1.96E-06</b> | <b>1.68E-04</b> | +x+xxx | rs10066744       |
| NA              | <b>5.08E-06</b> | <b>1.95E-06</b> | NA              | <b>1.95E-06</b> | <b>5.61E-06</b> | <b>1.95E-06</b> | +x+xxx | rs116319917      |
| 7.49E-01        | 3.74E-01        | 1.41E-01        | <b>9.93E-06</b> | 1.41E-01        | <b>1.36E-02</b> | 1.41E-01        | +--+   | rs1202310        |
| 4.98E-01        | 7.03E-02        | <b>6.84E-05</b> | <b>1.31E-05</b> | <b>6.84E-05</b> | <b>5.25E-06</b> | <b>6.84E-05</b> | ----x- | chr6:19952232:D  |
| 5.79E-01        | 8.57E-02        | <b>9.67E-05</b> | <b>8.64E-06</b> | <b>9.67E-05</b> | <b>2.76E-06</b> | <b>9.67E-05</b> | --x-   | rs12190760       |
| 5.95E-01        | 8.03E-02        | <b>3.30E-04</b> | <b>1.71E-05</b> | <b>3.30E-04</b> | <b>7.15E-06</b> | <b>3.30E-04</b> | --x-   | rs12193640       |
| 6.48E-01        | NA              | <b>7.77E-06</b> | <b>8.43E-06</b> | <b>7.77E-06</b> | <b>9.72E-06</b> | <b>7.77E-06</b> | x+x+x+ | rs114982299      |
| <b>1.48E-02</b> | 7.91E-02        | <b>2.02E-03</b> | <b>6.54E-07</b> | <b>2.02E-03</b> | <b>2.10E-03</b> | <b>2.02E-03</b> | -+++   | rs72906044       |
| <b>3.24E-02</b> | 7.79E-02        | <b>6.36E-04</b> | <b>4.44E-07</b> | <b>6.36E-04</b> | <b>1.57E-03</b> | <b>6.36E-04</b> | -+++   | chr6:51199846:D  |
| <b>9.68E-03</b> | <b>4.91E-02</b> | <b>7.92E-04</b> | <b>1.46E-07</b> | <b>7.92E-04</b> | <b>1.22E-03</b> | <b>7.92E-04</b> | -+++   | rs17665889       |
| <b>1.46E-02</b> | 6.46E-02        | <b>1.15E-03</b> | <b>7.33E-07</b> | <b>1.15E-03</b> | <b>2.30E-03</b> | <b>1.15E-03</b> | -+++   | rs16881418       |
| <b>1.07E-02</b> | 6.61E-02        | <b>1.01E-03</b> | <b>2.31E-07</b> | <b>1.01E-03</b> | <b>1.26E-03</b> | <b>1.01E-03</b> | -+++   | rs7738302        |
| <b>1.16E-02</b> | 6.75E-02        | <b>1.05E-03</b> | <b>2.67E-07</b> | <b>1.05E-03</b> | <b>1.34E-03</b> | <b>1.05E-03</b> | -+++   | rs12529854       |
| <b>1.27E-02</b> | 8.54E-02        | <b>9.65E-04</b> | <b>2.86E-07</b> | <b>9.65E-04</b> | <b>1.17E-03</b> | <b>9.65E-04</b> | -+++   | rs1327284        |
| <b>1.25E-02</b> | 9.25E-02        | <b>8.70E-04</b> | <b>2.78E-07</b> | <b>8.70E-04</b> | <b>1.06E-03</b> | <b>8.70E-04</b> | -+++   | rs10498783       |
| <b>1.18E-02</b> | 9.72E-02        | <b>1.14E-03</b> | <b>3.56E-07</b> | <b>1.14E-03</b> | <b>1.16E-03</b> | <b>1.14E-03</b> | -+++   | rs1327280        |
| <b>1.19E-02</b> | 1.06E-01        | <b>7.31E-04</b> | <b>2.67E-07</b> | <b>7.31E-04</b> | <b>9.03E-04</b> | <b>7.31E-04</b> | -+++   | chr6:51255307:D  |
| <b>2.24E-02</b> | NA              | <b>1.74E-06</b> | <b>2.02E-06</b> | <b>1.74E-06</b> | <b>2.38E-06</b> | <b>1.74E-06</b> | x+x+x+ | rs12527522       |
| <b>1.80E-02</b> | 1.11E-01        | <b>3.01E-03</b> | <b>7.92E-06</b> | <b>3.01E-03</b> | <b>6.70E-03</b> | <b>3.01E-03</b> | -+++   | rs6940087        |
| <b>1.69E-02</b> | 1.92E-01        | <b>2.08E-03</b> | <b>5.87E-06</b> | <b>2.08E-03</b> | <b>4.84E-03</b> | <b>2.08E-03</b> | -+++   | rs72906075       |
| <b>2.14E-02</b> | 1.04E-01        | <b>9.08E-04</b> | <b>1.52E-06</b> | <b>9.08E-04</b> | <b>2.36E-03</b> | <b>9.08E-04</b> | -+++   | rs1857188        |
| <b>1.78E-02</b> | 9.59E-02        | <b>3.35E-03</b> | <b>8.10E-06</b> | <b>3.35E-03</b> | <b>7.46E-03</b> | <b>3.35E-03</b> | -+++   | rs111885630      |
| <b>1.77E-02</b> | 1.01E-01        | <b>3.28E-03</b> | <b>8.16E-06</b> | <b>3.28E-03</b> | <b>7.48E-03</b> | <b>3.28E-03</b> | -+++   | rs12524614       |
| <b>2.64E-02</b> | 4.84E-01        | <b>7.72E-04</b> | <b>6.84E-06</b> | <b>7.72E-04</b> | <b>2.47E-03</b> | <b>7.72E-04</b> | -+++   | rs16881457       |
| <b>2.68E-02</b> | 5.76E-01        | <b>5.49E-04</b> | <b>5.19E-06</b> | <b>5.49E-04</b> | <b>1.54E-03</b> | <b>5.49E-04</b> | -+++   | rs16881462       |
| 6.78E-02        | 2.58E-01        | <b>4.93E-03</b> | <b>6.55E-06</b> | <b>4.93E-03</b> | <b>5.93E-03</b> | <b>4.93E-03</b> | -+++   | rs72900275       |
| 5.51E-02        | 1.80E-01        | <b>5.76E-03</b> | <b>7.55E-06</b> | <b>5.76E-03</b> | <b>9.12E-03</b> | <b>5.76E-03</b> | -+++   | rs72900278       |
| 8.12E-02        | 4.72E-01        | <b>3.46E-03</b> | <b>9.89E-06</b> | <b>3.46E-03</b> | <b>4.55E-03</b> | <b>3.46E-03</b> | -+++   | rs16881539       |

|                 |                 |                 |                 |                 |                 |                 |        |                 |
|-----------------|-----------------|-----------------|-----------------|-----------------|-----------------|-----------------|--------|-----------------|
| 8.32E-02        | 3.56E-01        | <b>4.62E-03</b> | <b>8.92E-06</b> | <b>4.62E-03</b> | <b>5.27E-03</b> | <b>4.62E-03</b> | -++++  | rs17814136      |
| 7.41E-02        | 3.80E-01        | <b>4.61E-03</b> | <b>9.97E-06</b> | <b>4.61E-03</b> | <b>5.01E-03</b> | <b>4.61E-03</b> | -++++  | rs60207381      |
| 7.12E-02        | 4.65E-01        | <b>3.45E-03</b> | <b>6.87E-06</b> | <b>3.45E-03</b> | <b>3.74E-03</b> | <b>3.45E-03</b> | -++++  | rs74536655      |
| 7.36E-02        | 3.94E-01        | <b>3.66E-03</b> | <b>8.68E-06</b> | <b>3.66E-03</b> | <b>4.26E-03</b> | <b>3.66E-03</b> | -++++  | rs72902183      |
| 6.76E-02        | 4.60E-01        | <b>3.46E-03</b> | <b>6.83E-06</b> | <b>3.46E-03</b> | <b>3.78E-03</b> | <b>3.46E-03</b> | -++++  | rs12528509      |
| 7.36E-02        | 3.92E-01        | <b>3.68E-03</b> | <b>8.65E-06</b> | <b>3.68E-03</b> | <b>4.27E-03</b> | <b>3.68E-03</b> | -++++  | rs12528978      |
| 8.78E-02        | NA              | <b>4.45E-06</b> | <b>1.75E-06</b> | <b>4.45E-06</b> | <b>2.06E-06</b> | <b>4.45E-06</b> | x+x+xx | rs13209289      |
| 1.09E-01        | NA              | <b>2.57E-05</b> | <b>7.01E-06</b> | <b>2.57E-05</b> | <b>8.11E-06</b> | <b>2.57E-05</b> | x+x+xx | rs11751461      |
| NA              | <b>1.39E-06</b> | <b>4.13E-06</b> | NA              | <b>4.13E-06</b> | <b>1.56E-06</b> | <b>4.13E-06</b> | +x+x+x | rs189276636     |
| NA              | <b>9.41E-06</b> | <b>3.57E-04</b> | NA              | <b>3.57E-04</b> | <b>1.03E-05</b> | <b>3.57E-04</b> | +x-x+x | rs10267821      |
| NA              | <b>5.39E-06</b> | <b>2.29E-04</b> | NA              | <b>2.29E-04</b> | <b>5.96E-06</b> | <b>2.29E-04</b> | +x-x+x | rs28507362      |
| NA              | <b>2.69E-06</b> | <b>1.75E-04</b> | NA              | <b>1.75E-04</b> | <b>2.99E-06</b> | <b>1.75E-04</b> | +x-x+x | rs6967571       |
| 4.52E-01        | <b>6.80E-03</b> | <b>1.36E-06</b> | <b>1.67E-04</b> | <b>1.36E-06</b> | <b>6.35E-06</b> | <b>1.36E-06</b> | +++++x | chr7:75707519:D |
| <b>3.43E-02</b> | 6.77E-01        | <b>5.92E-04</b> | <b>6.14E-06</b> | <b>5.92E-04</b> | <b>1.71E-04</b> | <b>5.92E-04</b> | -++++  | rs2732768       |
| 1.04E-01        | <b>7.00E-03</b> | <b>3.32E-06</b> | <b>9.91E-06</b> | <b>3.32E-06</b> | <b>2.72E-07</b> | <b>3.32E-06</b> | +++++  | rs12534830      |
| <b>4.43E-02</b> | 2.71E-01        | <b>2.04E-02</b> | <b>6.45E-06</b> | <b>2.04E-02</b> | <b>1.14E-02</b> | <b>2.04E-02</b> | +--+   | rs4143206       |
| <b>4.38E-02</b> | 3.52E-01        | <b>1.40E-04</b> | <b>3.17E-06</b> | <b>1.40E-04</b> | <b>2.42E-05</b> | <b>1.40E-04</b> | +++++  | rs2732766       |
| <b>4.35E-02</b> | 3.59E-01        | <b>1.44E-04</b> | <b>2.90E-06</b> | <b>1.44E-04</b> | <b>2.36E-05</b> | <b>1.44E-04</b> | +++++  | rs1405974       |
| 5.33E-02        | 2.72E-01        | <b>2.64E-02</b> | <b>7.91E-06</b> | <b>2.64E-02</b> | <b>1.23E-02</b> | <b>2.64E-02</b> | +--+   | rs1346686       |
| <b>3.97E-02</b> | 3.71E-01        | <b>1.41E-04</b> | <b>2.58E-06</b> | <b>1.41E-04</b> | <b>2.30E-05</b> | <b>1.41E-04</b> | +++++  | rs2732765       |
| <b>4.35E-02</b> | 3.59E-01        | <b>1.44E-04</b> | <b>2.90E-06</b> | <b>1.44E-04</b> | <b>2.36E-05</b> | <b>1.44E-04</b> | +++++  | rs2732764       |
| <b>4.43E-02</b> | 3.93E-01        | <b>1.81E-04</b> | <b>3.03E-06</b> | <b>1.81E-04</b> | <b>2.90E-05</b> | <b>1.81E-04</b> | +++++  | rs2564777       |
| <b>4.35E-02</b> | 3.59E-01        | <b>1.44E-04</b> | <b>2.90E-06</b> | <b>1.44E-04</b> | <b>2.35E-05</b> | <b>1.44E-04</b> | +++++  | rs2564778       |
| <b>2.60E-02</b> | 2.08E-01        | <b>2.82E-05</b> | <b>3.52E-06</b> | <b>2.82E-05</b> | <b>1.12E-05</b> | <b>2.82E-05</b> | +++++  | rs7385520       |
| 5.52E-02        | 8.63E-02        | <b>1.51E-05</b> | <b>2.58E-06</b> | <b>1.51E-05</b> | <b>2.58E-06</b> | <b>1.51E-05</b> | +++++  | rs7385554       |
| 5.11E-02        | 5.35E-01        | <b>3.14E-04</b> | <b>2.14E-06</b> | <b>3.14E-04</b> | <b>3.95E-05</b> | <b>3.14E-04</b> | +++++  | rs4333515       |
| 5.19E-02        | 5.18E-01        | <b>2.30E-04</b> | <b>3.60E-06</b> | <b>2.30E-04</b> | <b>6.82E-05</b> | <b>2.30E-04</b> | +++++  | rs4275151       |
| 6.66E-02        | 2.61E-01        | <b>2.42E-02</b> | <b>8.52E-06</b> | <b>2.42E-02</b> | <b>1.32E-02</b> | <b>2.42E-02</b> | +--+   | rs4560724       |
| 7.00E-02        | 9.04E-02        | <b>4.15E-05</b> | <b>8.12E-06</b> | <b>4.15E-05</b> | <b>5.83E-06</b> | <b>4.15E-05</b> | +++++  | rs2564780       |
| <b>4.42E-02</b> | 3.55E-01        | <b>1.26E-04</b> | <b>2.46E-06</b> | <b>1.26E-04</b> | <b>2.03E-05</b> | <b>1.26E-04</b> | +++++  | rs2696173       |
| <b>4.30E-02</b> | 3.33E-01        | <b>1.18E-04</b> | <b>2.43E-06</b> | <b>1.18E-04</b> | <b>1.80E-05</b> | <b>1.18E-04</b> | +++++  | rs2696174       |
| 5.39E-02        | 2.82E-01        | <b>2.44E-02</b> | <b>6.51E-06</b> | <b>2.44E-02</b> | <b>1.08E-02</b> | <b>2.44E-02</b> | +--+   | rs1540847       |
| <b>4.13E-02</b> | 3.45E-01        | <b>1.28E-04</b> | <b>2.54E-06</b> | <b>1.28E-04</b> | <b>1.98E-05</b> | <b>1.28E-04</b> | +++++  | rs1835285       |
| 5.64E-02        | 3.80E-01        | <b>1.99E-02</b> | <b>5.75E-06</b> | <b>1.99E-02</b> | <b>6.83E-03</b> | <b>1.99E-02</b> | ---+   | rs7455090       |
| 5.29E-02        | 2.94E-01        | <b>1.85E-02</b> | <b>3.93E-06</b> | <b>1.85E-02</b> | <b>8.21E-03</b> | <b>1.85E-02</b> | +--+   | rs10265865      |
| 5.33E-02        | 3.08E-01        | <b>2.23E-02</b> | <b>6.86E-06</b> | <b>2.23E-02</b> | <b>9.85E-03</b> | <b>2.23E-02</b> | +--+   | rs1429748       |
| <b>3.78E-02</b> | 3.29E-01        | <b>4.65E-02</b> | <b>8.34E-06</b> | <b>4.65E-02</b> | <b>1.04E-02</b> | <b>4.65E-02</b> | +--+   | rs7788690       |
| <b>4.63E-02</b> | 3.78E-01        | <b>2.08E-04</b> | <b>4.33E-06</b> | <b>2.08E-04</b> | <b>3.91E-05</b> | <b>2.08E-04</b> | +----  | rs2033294       |
| <b>2.92E-02</b> | 7.63E-01        | <b>2.22E-03</b> | <b>3.50E-06</b> | <b>2.22E-03</b> | <b>2.08E-04</b> | <b>2.22E-03</b> | +---+  | rs2033295       |
| <b>4.05E-02</b> | 6.38E-01        | <b>4.57E-04</b> | <b>2.99E-06</b> | <b>4.57E-04</b> | <b>8.66E-05</b> | <b>4.57E-04</b> | +----  | rs2888404       |
| <b>2.41E-02</b> | 9.14E-01        | <b>4.59E-03</b> | <b>3.91E-06</b> | <b>4.59E-03</b> | <b>6.11E-04</b> | <b>4.59E-03</b> | +---+  | rs7805482       |
| <b>3.51E-02</b> | 6.72E-01        | <b>3.72E-04</b> | <b>1.92E-06</b> | <b>3.72E-04</b> | <b>7.46E-05</b> | <b>3.72E-04</b> | +---+  | rs6950763       |
| 1.60E-01        | <b>7.92E-03</b> | <b>4.81E-06</b> | <b>2.62E-05</b> | <b>4.81E-06</b> | <b>8.15E-07</b> | <b>4.81E-06</b> | +++++  | rs12536813      |
| <b>2.50E-02</b> | 8.83E-01        | <b>4.21E-03</b> | <b>4.68E-06</b> | <b>4.21E-03</b> | <b>7.48E-04</b> | <b>4.21E-03</b> | +---+  | rs10270393      |
| <b>1.72E-02</b> | 8.45E-01        | <b>4.98E-03</b> | <b>5.39E-06</b> | <b>4.98E-03</b> | <b>9.56E-04</b> | <b>4.98E-03</b> | +---+  | rs6964515       |
| NA              | <b>5.08E-06</b> | <b>1.29E-05</b> | NA              | <b>1.29E-05</b> | <b>5.62E-06</b> | <b>1.29E-05</b> | xx+x+x | rs78596049      |

|          |          |          |          |          |          |          |        |                  |
|----------|----------|----------|----------|----------|----------|----------|--------|------------------|
| 7.25E-05 | NA       | 7.16E-04 | 7.37E-06 | 7.16E-04 | 8.52E-06 | 7.16E-04 | x-x+x+ | rs77837076       |
| 1.25E-04 | 1.32E-01 | 2.88E-03 | 5.13E-06 | 2.88E-03 | 1.18E-05 | 2.88E-03 | ++++x+ | rs34937939       |
| 2.08E-04 | NA       | 3.53E-03 | 9.44E-06 | 3.53E-03 | 3.93E-05 | 3.53E-03 | +x+x+  | rs34065982       |
| 3.93E-01 | 1.91E-07 | 2.56E-04 | 6.78E-02 | 2.56E-04 | 1.10E-05 | 2.56E-04 | +++++  | chr7:127381495:l |
| 4.71E-01 | 1.41E-04 | 7.72E-05 | 8.28E-03 | 7.72E-05 | 6.77E-06 | 7.72E-05 | ++++xx | rs79925690       |
| 1.79E-02 | NA       | 2.78E-05 | 7.28E-08 | 2.78E-05 | 2.34E-06 | 2.78E-05 | --x+x+ | rs7832545        |
| 1.82E-02 | 3.00E-01 | 4.14E-06 | 2.95E-08 | 4.14E-06 | 1.02E-07 | 4.14E-06 | +++x+  | rs77378271       |
| 2.06E-02 | NA       | 4.44E-06 | 8.83E-08 | 4.44E-06 | 2.42E-07 | 4.44E-06 | +x+x+  | rs75721860       |
| NA       | 3.19E-07 | 3.27E-04 | NA       | 3.27E-04 | 3.61E-07 | 3.27E-04 | xx+x+x | rs7836257        |
| 6.50E-01 | 3.32E-03 | 2.59E-05 | 2.24E-04 | 2.59E-05 | 2.80E-06 | 2.59E-05 | +++++  | rs902820         |
| 4.90E-01 | 2.56E-01 | 1.66E-01 | 3.84E-06 | 1.66E-01 | 6.93E-02 | 1.66E-01 | +---xx | rs192069564      |
| 2.83E-02 | NA       | 9.90E-04 | 3.39E-06 | 9.90E-04 | 3.96E-06 | 9.90E-04 | x+x+x+ | rs77322165       |
| 2.83E-02 | NA       | 9.83E-04 | 3.24E-06 | 9.83E-04 | 3.79E-06 | 9.83E-04 | x+x+x+ | rs10969090       |
| 2.83E-02 | NA       | 9.90E-04 | 2.98E-06 | 9.90E-04 | 3.49E-06 | 9.90E-04 | x+x+x+ | rs78011063       |
| 3.44E-02 | NA       | 1.10E-03 | 4.99E-07 | 1.10E-03 | 5.98E-07 | 1.10E-03 | x+x+x+ | rs75849759       |
| 3.04E-02 | NA       | 4.04E-05 | 3.70E-07 | 4.04E-05 | 4.45E-07 | 4.04E-05 | x+x+x+ | rs10969106       |
| 3.51E-02 | NA       | 5.94E-05 | 6.38E-07 | 5.94E-05 | 7.62E-07 | 5.94E-05 | x+x+x+ | rs80128289       |
| 3.75E-02 | NA       | 9.35E-05 | 9.48E-07 | 9.35E-05 | 1.13E-06 | 9.35E-05 | x+x+x+ | rs8181059        |
| 5.78E-01 | NA       | 1.95E-03 | 4.74E-05 | 1.95E-03 | 8.59E-06 | 1.95E-03 | x+++x+ | rs118089179      |
| 1.72E-01 | 9.41E-06 | 9.82E-03 | 7.56E-01 | 9.82E-03 | 7.94E-03 | 9.82E-03 | -+---  | rs10869996       |
| 1.55E-01 | 9.14E-06 | 6.07E-03 | 8.82E-01 | 6.07E-03 | 3.16E-03 | 6.07E-03 | -+---  | rs10781482       |
| 1.53E-01 | 8.87E-06 | 6.10E-03 | 8.86E-01 | 6.10E-03 | 3.16E-03 | 6.10E-03 | -+---  | rs10781489       |
| NA       | 3.76E-06 | 1.06E-03 | NA       | 1.06E-03 | 4.16E-06 | 1.06E-03 | +x+xxx | rs7853028        |
| 6.38E-02 | 1.51E-01 | 1.31E-03 | 7.24E-06 | 1.31E-03 | 1.49E-05 | 1.31E-03 | ---x-  | rs7081023        |
| 1.76E-01 | 1.54E-03 | 5.15E-05 | 1.16E-03 | 5.15E-05 | 6.46E-06 | 5.15E-05 | +++xx  | rs2399788        |
| NA       | 3.39E-07 | 3.15E-06 | NA       | 3.15E-06 | 3.84E-07 | 3.15E-06 | +x+x+x | rs115881020      |
| NA       | 3.45E-07 | 3.74E-06 | NA       | 3.74E-06 | 3.91E-07 | 3.74E-06 | +x+x+x | rs114400896      |
| NA       | 9.17E-08 | 8.78E-08 | NA       | 8.78E-08 | 1.05E-07 | 8.78E-08 | +x+x+x | rs115553536      |
| NA       | 7.24E-07 | 1.26E-06 | NA       | 1.26E-06 | 8.14E-07 | 1.26E-06 | +x+x+x | rs116449238      |
| NA       | 1.78E-06 | 3.00E-06 | NA       | 3.00E-06 | 1.98E-06 | 3.00E-06 | +x+x+x | rs9888015        |
| 2.44E-01 | NA       | 5.16E-07 | 1.97E-07 | 5.16E-07 | 2.39E-07 | 5.16E-07 | x+x+x+ | rs76942454       |
| 6.36E-01 | NA       | 1.97E-06 | 9.89E-07 | 1.97E-06 | 1.17E-06 | 1.97E-06 | x+x+x+ | rs74361869       |
| 6.36E-01 | NA       | 1.99E-06 | 9.88E-07 | 1.99E-06 | 1.17E-06 | 1.99E-06 | x+x+x+ | rs75381638       |
| 6.34E-01 | NA       | 2.09E-06 | 1.00E-06 | 2.09E-06 | 1.19E-06 | 2.09E-06 | x+x+x+ | rs3026705        |
| 6.34E-01 | NA       | 2.30E-06 | 9.47E-07 | 2.30E-06 | 1.12E-06 | 2.30E-06 | x+x+x+ | rs3026713        |
| 9.14E-01 | NA       | 4.60E-06 | 6.05E-07 | 4.60E-06 | 7.23E-07 | 4.60E-06 | x+x+xx | rs3026721        |
| 9.56E-01 | NA       | 6.69E-06 | 7.64E-07 | 6.69E-06 | 9.10E-07 | 6.69E-06 | x+x+xx | rs80080342       |
| 9.38E-01 | NA       | 5.45E-06 | 7.16E-07 | 5.45E-06 | 8.53E-07 | 5.45E-06 | x+x+xx | rs74865054       |
| 9.54E-01 | NA       | 6.56E-06 | 7.95E-07 | 6.56E-06 | 9.47E-07 | 6.56E-06 | x+x+xx | rs77154599       |
| 9.65E-01 | NA       | 6.08E-06 | 8.33E-07 | 6.08E-06 | 9.91E-07 | 6.08E-06 | x+x+xx | rs74438020       |
| 9.66E-01 | NA       | 6.06E-06 | 8.37E-07 | 6.06E-06 | 9.96E-07 | 6.06E-06 | x+x+xx | chr10:43579081:D |
| 9.70E-01 | NA       | 5.99E-06 | 8.67E-07 | 5.99E-06 | 1.03E-06 | 5.99E-06 | x+x+xx | rs77776459       |
| 9.80E-01 | NA       | 6.57E-06 | 9.77E-07 | 6.57E-06 | 1.16E-06 | 6.57E-06 | x+x+xx | rs76568066       |
| 9.77E-01 | NA       | 4.67E-06 | 7.40E-07 | 4.67E-06 | 8.82E-07 | 4.67E-06 | x+x+xx | rs76837320       |
| 7.40E-01 | 1.15E-01 | 2.14E-06 | 2.51E-07 | 2.14E-06 | 6.60E-07 | 2.14E-06 | ++--+x | rs74400468       |
| 9.60E-01 | NA       | 1.73E-06 | 3.38E-07 | 1.73E-06 | 4.07E-07 | 1.73E-06 | x+x+xx | rs142883467      |

|          |          |          |          |          |          |          |        |                  |
|----------|----------|----------|----------|----------|----------|----------|--------|------------------|
| 9.66E-01 | NA       | 1.03E-03 | 9.12E-06 | 1.03E-03 | 1.84E-03 | 1.03E-03 | x+-xx  | rs11238474       |
| 7.33E-01 | 5.18E-05 | 5.39E-05 | 3.43E-02 | 5.39E-05 | 8.01E-06 | 5.39E-05 | ----x  | rs10762724       |
| NA       | 5.71E-06 | 4.14E-04 | NA       | 4.14E-04 | 6.31E-06 | 4.14E-04 | +x+x+x | rs146091982      |
| NA       | 8.98E-06 | 5.04E-04 | NA       | 5.04E-04 | 9.87E-06 | 5.04E-04 | +x+x+x | chr10:95669221:D |
| 2.64E-01 | 4.71E-04 | 2.23E-05 | 3.31E-03 | 2.23E-05 | 7.30E-06 | 2.23E-05 | +++++  | rs115058152      |
| 4.28E-02 | 4.16E-06 | 5.03E-02 | 3.74E-01 | 5.03E-02 | 1.66E-02 | 5.03E-02 | +++++  | rs11575631       |
| 4.29E-02 | 5.67E-06 | 5.31E-02 | 3.81E-01 | 5.31E-02 | 1.84E-02 | 5.31E-02 | +++++  | rs11575634       |
| 3.63E-02 | 4.61E-06 | 5.13E-02 | 3.52E-01 | 5.13E-02 | 1.94E-02 | 5.13E-02 | +++++  | rs4643011        |
| 2.29E-02 | 3.95E-07 | 5.47E-06 | NA       | 5.47E-06 | 4.47E-07 | 5.47E-06 | -x-x-x | rs73443003       |
| 1.25E-02 | 3.77E-01 | 1.43E-03 | 7.61E-06 | 1.43E-03 | 1.35E-04 | 1.43E-03 | +++++  | rs12278342       |
| 1.20E-02 | 3.56E-01 | 1.22E-03 | 7.03E-06 | 1.22E-03 | 1.14E-04 | 1.22E-03 | +++++  | chr11:22884459:D |
| 1.82E-02 | 1.01E-01 | 4.80E-04 | 8.13E-06 | 4.80E-04 | 4.42E-05 | 4.80E-04 | +++++  | rs12293401       |
| 1.14E-02 | 3.36E-01 | 1.05E-03 | 6.47E-06 | 1.05E-03 | 9.65E-05 | 1.05E-03 | +++++  | rs12294894       |
| 7.71E-03 | 7.24E-01 | 5.92E-03 | 5.51E-06 | 5.92E-03 | 9.38E-04 | 5.92E-03 | +++++  | chr11:22885400:D |
| 1.80E-02 | 8.68E-02 | 4.06E-04 | 7.97E-06 | 4.06E-04 | 3.40E-05 | 4.06E-04 | +++++  | rs72865358       |
| 1.72E-02 | 1.48E-01 | 8.88E-04 | 7.71E-06 | 8.88E-04 | 7.89E-05 | 8.88E-04 | +++++  | rs4540836        |
| 2.60E-02 | 1.54E-01 | 1.02E-03 | 9.43E-06 | 1.02E-03 | 9.82E-05 | 1.02E-03 | +++++  | rs4459305        |
| 2.64E-02 | 1.67E-01 | 1.01E-03 | 8.25E-06 | 1.01E-03 | 1.04E-04 | 1.01E-03 | +++++  | rs4427562        |
| 1.71E-02 | 1.00E-01 | 4.36E-04 | 7.65E-06 | 4.36E-04 | 4.17E-05 | 4.36E-04 | +++++  | rs7946163        |
| 2.46E-02 | 1.65E-01 | 1.04E-03 | 9.71E-06 | 1.04E-03 | 1.12E-04 | 1.04E-03 | +++++  | rs12275725       |
| 2.42E-02 | 1.89E-01 | 1.29E-03 | 9.37E-06 | 1.29E-03 | 1.37E-04 | 1.29E-03 | +++++  | rs4922632        |
| 1.09E-02 | 3.08E-01 | 7.81E-04 | 5.81E-06 | 7.81E-04 | 7.44E-05 | 7.81E-04 | +++++  | rs61889513       |
| 2.56E-02 | 1.65E-01 | 7.94E-04 | 6.66E-06 | 7.94E-04 | 8.83E-05 | 7.94E-04 | +++++  | rs12292718       |
| 1.53E-02 | 9.16E-02 | 3.95E-04 | 8.49E-06 | 3.95E-04 | 3.80E-05 | 3.95E-04 | +++++  | rs12292974       |
| 2.08E-02 | 2.06E-01 | 5.59E-04 | 4.66E-06 | 5.59E-04 | 1.07E-04 | 5.59E-04 | +++++  | rs4384387        |
| 2.27E-02 | 2.11E-01 | 3.97E-04 | 2.96E-06 | 3.97E-04 | 9.16E-05 | 3.97E-04 | +++++  | rs4244495        |
| 2.08E-02 | 2.08E-01 | 5.77E-04 | 4.59E-06 | 5.77E-04 | 1.08E-04 | 5.77E-04 | +++++  | rs4923035        |
| 1.39E-02 | 1.25E-01 | 2.80E-04 | 5.04E-06 | 2.80E-04 | 4.69E-05 | 2.80E-04 | +++++  | rs4486627        |
| 1.38E-02 | 1.25E-01 | 2.79E-04 | 5.01E-06 | 2.79E-04 | 4.67E-05 | 2.79E-04 | +++++  | rs4495893        |
| 1.38E-02 | 1.25E-01 | 2.79E-04 | 5.00E-06 | 2.79E-04 | 4.67E-05 | 2.79E-04 | +++++  | rs4255538        |
| 1.35E-02 | 1.41E-01 | 2.64E-04 | 4.31E-06 | 2.64E-04 | 5.13E-05 | 2.64E-04 | +++++  | rs4466830        |
| 1.36E-02 | 1.25E-01 | 2.74E-04 | 4.89E-06 | 2.74E-04 | 4.61E-05 | 2.74E-04 | +++++  | chr11:22894411:D |
| 1.17E-02 | 1.27E-01 | 2.02E-04 | 3.93E-06 | 2.02E-04 | 4.11E-05 | 2.02E-04 | +++++  | rs12284580       |
| 1.29E-02 | 1.26E-01 | 2.57E-04 | 4.94E-06 | 2.57E-04 | 4.65E-05 | 2.57E-04 | +++++  | rs12277600       |
| 1.62E-02 | 1.20E-01 | 2.68E-04 | 4.95E-06 | 2.68E-04 | 4.26E-05 | 2.68E-04 | +++++  | rs9783311        |
| 2.14E-02 | 2.01E-01 | 5.22E-04 | 4.24E-06 | 5.22E-04 | 9.80E-05 | 5.22E-04 | +++++  | rs9783404        |
| 1.11E-02 | 1.08E-01 | 7.97E-05 | 3.45E-06 | 7.97E-05 | 2.80E-05 | 7.97E-05 | +++++  | rs12284600       |
| 1.08E-02 | 1.68E-01 | 2.83E-04 | 3.01E-06 | 2.83E-04 | 5.80E-05 | 2.83E-04 | +++++  | rs12284602       |
| 8.28E-03 | 3.15E-01 | 7.41E-04 | 3.58E-06 | 7.41E-04 | 2.25E-04 | 7.41E-04 | +++++  | chr11:22898264:I |
| 8.91E-03 | 4.28E-01 | 1.12E-03 | 4.03E-06 | 1.12E-03 | 1.04E-04 | 1.12E-03 | +++++  | rs10488701       |
| 1.08E-02 | 1.90E-01 | 3.42E-04 | 2.53E-06 | 3.42E-04 | 6.50E-05 | 3.42E-04 | +++++  | rs2429779        |
| 1.68E-02 | 1.93E-01 | 5.57E-04 | 7.12E-06 | 5.57E-04 | 1.18E-04 | 5.57E-04 | +++++  | rs11026825       |
| 1.07E-02 | 1.41E-01 | 2.86E-04 | 3.00E-06 | 2.86E-04 | 4.29E-05 | 2.86E-04 | +++++  | rs12290230       |
| 1.07E-02 | 1.97E-01 | 3.96E-04 | 3.00E-06 | 3.96E-04 | 7.67E-05 | 3.96E-04 | +++++  | rs2403776        |
| 1.07E-02 | 1.97E-01 | 3.97E-04 | 2.99E-06 | 3.97E-04 | 7.66E-05 | 3.97E-04 | +++++  | rs2429777        |
| 1.07E-02 | 1.97E-01 | 3.96E-04 | 3.01E-06 | 3.96E-04 | 7.67E-05 | 3.96E-04 | +++++  | rs2253956        |

|          |          |          |          |          |          |          |        |                  |
|----------|----------|----------|----------|----------|----------|----------|--------|------------------|
| 1.03E-02 | 1.95E-01 | 3.03E-04 | 2.68E-06 | 3.03E-04 | 7.00E-05 | 3.03E-04 | +++++  | rs2429776        |
| 5.46E-03 | 1.36E-01 | 3.57E-04 | 4.44E-06 | 3.57E-04 | 1.04E-04 | 3.57E-04 | +++++  | rs2429775        |
| 8.75E-03 | 4.55E-01 | 1.14E-03 | 4.11E-06 | 1.14E-03 | 1.19E-04 | 1.14E-03 | +++++  | rs2429774        |
| 1.55E-02 | 2.82E-01 | 6.83E-04 | 3.15E-06 | 6.83E-04 | 1.59E-04 | 6.83E-04 | +++++  | rs2470329        |
| 1.18E-02 | 2.02E-01 | 5.99E-04 | 5.51E-06 | 5.99E-04 | 1.17E-04 | 5.99E-04 | +++++  | chr11:22903503:l |
| 1.22E-02 | 1.83E-01 | 4.77E-04 | 3.85E-06 | 4.77E-04 | 8.01E-05 | 4.77E-04 | +++++  | rs2429773        |
| 1.07E-02 | 1.97E-01 | 3.96E-04 | 3.28E-06 | 3.96E-04 | 8.13E-05 | 3.96E-04 | +++++  | rs4296039        |
| 1.07E-02 | 1.97E-01 | 3.97E-04 | 3.39E-06 | 3.97E-04 | 8.25E-05 | 3.97E-04 | +++++  | rs4543991        |
| 1.07E-02 | 2.08E-01 | 4.75E-04 | 3.19E-06 | 4.75E-04 | 8.70E-05 | 4.75E-04 | +++++  | rs2470309        |
| 8.75E-03 | 4.60E-01 | 1.18E-03 | 4.47E-06 | 1.18E-03 | 1.29E-04 | 1.18E-03 | +++++  | rs2470308        |
| 1.07E-02 | 1.97E-01 | 3.99E-04 | 3.54E-06 | 3.99E-04 | 8.42E-05 | 3.99E-04 | +++++  | rs2470306        |
| 1.55E-02 | 2.92E-01 | 6.24E-04 | 3.25E-06 | 6.24E-04 | 1.73E-04 | 6.24E-04 | +++++  | rs2429772        |
| 1.07E-02 | 1.96E-01 | 4.00E-04 | 3.62E-06 | 4.00E-04 | 8.53E-05 | 4.00E-04 | +++++  | rs2429771        |
| 1.07E-02 | 1.96E-01 | 4.00E-04 | 3.64E-06 | 4.00E-04 | 8.55E-05 | 4.00E-04 | +++++  | rs2429770        |
| 1.07E-02 | 1.96E-01 | 4.01E-04 | 3.68E-06 | 4.01E-04 | 8.59E-05 | 4.01E-04 | +++++  | rs2429769        |
| 1.24E-02 | 1.95E-01 | 4.93E-04 | 5.15E-06 | 4.93E-04 | 1.01E-04 | 4.93E-04 | +++++  | chr11:22907658:D |
| 2.41E-02 | 2.61E-01 | 9.51E-04 | 7.24E-06 | 9.51E-04 | 2.09E-04 | 9.51E-04 | +++++  | rs2429768        |
| 1.22E-02 | 1.90E-01 | 4.04E-04 | 3.81E-06 | 4.04E-04 | 8.25E-05 | 4.04E-04 | +++++  | rs2429767        |
| 1.22E-02 | 1.90E-01 | 4.04E-04 | 3.87E-06 | 4.04E-04 | 8.32E-05 | 4.04E-04 | +++++  | rs2429766        |
| 1.22E-02 | 1.71E-01 | 3.61E-04 | 3.92E-06 | 3.61E-04 | 6.97E-05 | 3.61E-04 | +++++  | rs2470304        |
| 1.22E-02 | 1.89E-01 | 4.05E-04 | 3.93E-06 | 4.05E-04 | 8.38E-05 | 4.05E-04 | +++++  | rs2470303        |
| 1.22E-02 | 1.89E-01 | 4.07E-04 | 4.10E-06 | 4.07E-04 | 8.56E-05 | 4.07E-04 | +++++  | rs2429765        |
| 1.76E-02 | 2.82E-01 | 6.34E-04 | 3.79E-06 | 6.34E-04 | 1.76E-04 | 6.34E-04 | +++++  | rs2429764        |
| 1.76E-02 | 2.82E-01 | 6.36E-04 | 3.89E-06 | 6.36E-04 | 1.78E-04 | 6.36E-04 | +++++  | rs2429763        |
| 9.41E-03 | 1.74E-01 | 4.33E-04 | 3.09E-06 | 4.33E-04 | 6.12E-05 | 4.33E-04 | +++++  | chr11:22910682:l |
| 1.76E-02 | 2.81E-01 | 6.39E-04 | 4.07E-06 | 6.39E-04 | 1.82E-04 | 6.39E-04 | +++++  | rs2429761        |
| 1.22E-02 | 1.94E-01 | 4.41E-04 | 4.55E-06 | 4.41E-04 | 9.48E-05 | 4.41E-04 | +++++  | rs983867         |
| 1.21E-02 | 1.74E-01 | 3.69E-04 | 5.15E-06 | 3.69E-04 | 8.42E-05 | 3.69E-04 | +++++  | rs2429760        |
| 1.21E-02 | 1.88E-01 | 4.18E-04 | 5.13E-06 | 4.18E-04 | 9.59E-05 | 4.18E-04 | +++++  | rs113236916      |
| 1.29E-02 | 1.86E-01 | 4.39E-04 | 4.85E-06 | 4.39E-04 | 9.43E-05 | 4.39E-04 | +++++  | rs56892416       |
| 1.16E-02 | 1.87E-01 | 3.26E-04 | 4.60E-06 | 3.26E-04 | 8.92E-05 | 3.26E-04 | +++++  | rs987866         |
| 1.00E-02 | 5.48E-01 | 1.74E-03 | 6.81E-06 | 1.74E-03 | 2.43E-04 | 1.74E-03 | +++++  | rs987865         |
| 1.29E-02 | 1.90E-01 | 4.16E-04 | 3.94E-06 | 4.16E-04 | 8.30E-05 | 4.16E-04 | +++++  | rs2470301        |
| 1.21E-02 | 1.38E-01 | 2.68E-04 | 4.86E-06 | 2.68E-04 | 5.46E-05 | 2.68E-04 | +++++  | rs2429757        |
| 1.00E-02 | 5.60E-01 | 1.84E-03 | 6.98E-06 | 1.84E-03 | 2.59E-04 | 1.84E-03 | +++++  | rs2470300        |
| 1.21E-02 | 1.39E-01 | 2.69E-04 | 4.87E-06 | 2.69E-04 | 5.48E-05 | 2.69E-04 | +++++  | rs2429756        |
| 1.21E-02 | 1.39E-01 | 2.69E-04 | 4.87E-06 | 2.69E-04 | 5.48E-05 | 2.69E-04 | +++++  | rs2429755        |
| 1.21E-02 | 1.39E-01 | 2.69E-04 | 4.87E-06 | 2.69E-04 | 5.48E-05 | 2.69E-04 | +++++  | rs2429754        |
| 1.21E-02 | 1.39E-01 | 2.68E-04 | 4.87E-06 | 2.68E-04 | 5.48E-05 | 2.68E-04 | +++++  | rs2429753        |
| 1.75E-02 | 2.14E-01 | 4.22E-04 | 4.44E-06 | 4.22E-04 | 1.14E-04 | 4.22E-04 | +++++  | rs2041471        |
| 1.14E-02 | 1.38E-01 | 2.62E-04 | 4.67E-06 | 2.62E-04 | 5.35E-05 | 2.62E-04 | +++++  | rs2429752        |
| 1.00E-02 | 5.59E-01 | 1.79E-03 | 6.65E-06 | 1.79E-03 | 2.50E-04 | 1.79E-03 | +++++  | rs2429751        |
| 1.08E-02 | 5.66E-01 | 1.04E-03 | 5.45E-06 | 1.04E-03 | 2.89E-04 | 1.04E-03 | +++++  | rs929538         |
| 9.33E-01 | 7.56E-08 | 2.61E-03 | 6.07E-01 | 2.61E-03 | 1.72E-04 | 2.61E-03 | ++++   | chr11:81433204:l |
| 8.62E-01 | 9.59E-07 | 4.00E-02 | 6.82E-01 | 4.00E-02 | 1.95E-03 | 4.00E-02 | ++++   | chr11:81454803:D |
| NA       | 7.43E-06 | 6.84E-04 | NA       | 6.84E-04 | 8.18E-06 | 6.84E-04 | +x+x+x | rs116474042      |



|          |          |          |          |          |          |          |        |                   |
|----------|----------|----------|----------|----------|----------|----------|--------|-------------------|
| NA       | 9.91E-06 | 2.24E-04 | NA       | 2.24E-04 | 1.09E-05 | 2.24E-04 | +xxx+x | rs116617578       |
| 2.85E-02 | 1.07E-01 | 3.22E-04 | 8.54E-06 | 3.22E-04 | 2.71E-06 | 3.22E-04 | x+++++ | rs12807443        |
| 2.02E-02 | 4.61E-01 | 3.94E-04 | 5.39E-06 | 3.94E-04 | 1.66E-05 | 3.94E-04 | +++++  | rs71475112        |
| 2.29E-02 | 4.29E-01 | 3.65E-04 | 6.77E-06 | 3.65E-04 | 1.78E-05 | 3.65E-04 | +++++  | rs34883645        |
| 2.29E-02 | 4.29E-01 | 3.66E-04 | 6.80E-06 | 3.66E-04 | 1.78E-05 | 3.66E-04 | +++++  | rs17705117        |
| 2.64E-02 | NA       | 4.94E-04 | 9.92E-06 | 4.94E-04 | 6.22E-06 | 4.94E-04 | x+x+++ | rs10502107        |
| 2.14E-02 | 4.61E-01 | 4.00E-04 | 9.19E-06 | 4.00E-04 | 2.48E-05 | 4.00E-04 | +++++  | rs71475113        |
| 2.14E-02 | 4.63E-01 | 4.46E-04 | 9.05E-06 | 4.46E-04 | 2.47E-05 | 4.46E-04 | +++++  | rs74640618        |
| 3.53E-02 | 1.62E-01 | 1.21E-04 | 5.09E-07 | 1.21E-04 | 3.73E-07 | 1.21E-04 | +++++  | chr11:108899423:D |
| 2.14E-02 | 6.21E-01 | 6.10E-04 | 9.44E-06 | 6.10E-04 | 4.31E-05 | 6.10E-04 | +++++  | rs12785289        |
| 5.94E-03 | 4.71E-01 | 3.54E-04 | 8.02E-06 | 3.54E-04 | 2.36E-05 | 3.54E-04 | +++++  | rs71475116        |
| 1.88E-02 | 3.98E-01 | 3.75E-04 | 9.67E-06 | 3.75E-04 | 2.07E-05 | 3.75E-04 | +++++  | rs145386102       |
| 4.48E-01 | 2.89E-06 | 1.51E-05 | NA       | 1.51E-05 | 3.21E-06 | 1.51E-05 | +x+xxx | rs6589099         |
| 4.47E-02 | 7.88E-06 | 3.93E-04 | 2.14E-01 | 3.93E-04 | 7.94E-05 | 3.93E-04 | +++++  | rs4763938         |
| NA       | 1.43E-06 | 1.29E-06 | NA       | 1.29E-06 | 1.60E-06 | 1.29E-06 | +x+xxx | rs193047854       |
| 8.30E-01 | 7.45E-06 | 1.33E-02 | 5.42E-01 | 1.33E-02 | 1.63E-02 | 1.33E-02 | -+---+ | rs963921          |
| 9.41E-01 | 2.80E-01 | 3.65E-03 | 7.42E-06 | 3.65E-03 | 1.37E-04 | 3.65E-03 | ++++x+ | rs61934921        |
| NA       | 8.56E-06 | 1.03E-06 | NA       | 1.03E-06 | 9.41E-06 | 1.03E-06 | +x+x+x | rs149438816       |
| NA       | 5.26E-06 | 6.27E-07 | NA       | 6.27E-07 | 5.81E-06 | 6.27E-07 | +x+x+x | rs116063167       |
| NA       | 5.05E-06 | 6.29E-07 | NA       | 6.29E-07 | 5.59E-06 | 6.29E-07 | +x+x+x | rs116444748       |
| NA       | 2.03E-06 | 2.59E-05 | NA       | 2.59E-05 | 2.26E-06 | 2.59E-05 | +x+x+x | rs10162069        |
| NA       | 1.04E-06 | 1.19E-05 | NA       | 1.19E-05 | 1.16E-06 | 1.19E-05 | +x+x+x | rs9601205         |
| NA       | 1.03E-06 | 1.18E-05 | NA       | 1.18E-05 | 1.16E-06 | 1.18E-05 | +x+x+x | rs9601206         |
| NA       | 1.01E-06 | 1.16E-05 | NA       | 1.16E-05 | 1.14E-06 | 1.16E-05 | +x+x+x | rs79256830        |
| NA       | 9.43E-06 | 3.40E-05 | NA       | 3.40E-05 | 1.04E-05 | 3.40E-05 | -x-x-x | rs2329115         |
| NA       | 4.99E-06 | 1.71E-05 | NA       | 1.71E-05 | 5.51E-06 | 1.71E-05 | -x-x-x | rs4885623         |
| NA       | 1.91E-07 | 2.24E-06 | NA       | 2.24E-06 | 2.17E-07 | 2.24E-06 | +x+x+x | rs143748364       |
| NA       | 1.90E-06 | 1.50E-05 | NA       | 1.50E-05 | 2.12E-06 | 1.50E-05 | +x+x+x | rs116669275       |
| NA       | 1.94E-06 | 1.52E-05 | NA       | 1.52E-05 | 2.16E-06 | 1.52E-05 | +x+x+x | rs9601228         |
| NA       | 1.86E-06 | 1.24E-05 | NA       | 1.24E-05 | 2.08E-06 | 1.24E-05 | +x+x+x | rs9601230         |
| NA       | 1.24E-06 | 7.90E-06 | NA       | 7.90E-06 | 1.39E-06 | 7.90E-06 | +x+x+x | rs9593398         |
| NA       | 4.24E-06 | 1.73E-05 | NA       | 1.73E-05 | 4.69E-06 | 1.73E-05 | +x+x+x | chr13:80031949:D  |
| NA       | 2.35E-06 | 1.27E-05 | NA       | 1.27E-05 | 2.61E-06 | 1.27E-05 | +x+x+x | rs79054219        |
| NA       | 8.28E-06 | 2.36E-05 | NA       | 2.36E-05 | 9.11E-06 | 2.36E-05 | +x+x+x | rs115435584       |
| NA       | 3.45E-06 | 1.25E-05 | NA       | 1.25E-05 | 3.83E-06 | 1.25E-05 | +x+x+x | rs9601236         |
| NA       | 4.20E-06 | 1.32E-05 | NA       | 1.32E-05 | 4.65E-06 | 1.32E-05 | +x+x+x | rs114858730       |
| NA       | 3.41E-06 | 1.24E-05 | NA       | 1.24E-05 | 3.78E-06 | 1.24E-05 | +x+x+x | rs77796609        |
| NA       | 3.40E-06 | 1.22E-05 | NA       | 1.22E-05 | 3.77E-06 | 1.22E-05 | +x+x+x | rs76602452        |
| NA       | 9.70E-06 | 2.83E-05 | NA       | 2.83E-05 | 1.07E-05 | 2.83E-05 | +x+x+x | rs116284533       |
| NA       | 5.88E-06 | 1.46E-05 | NA       | 1.46E-05 | 6.49E-06 | 1.46E-05 | +x+x+x | rs9593403         |
| NA       | 2.38E-06 | 7.35E-06 | NA       | 7.35E-06 | 2.65E-06 | 7.35E-06 | +x+x+x | rs115651893       |
| NA       | 5.78E-06 | 1.40E-05 | NA       | 1.40E-05 | 6.38E-06 | 1.40E-05 | +x+x+x | rs13378140        |
| NA       | 5.81E-06 | 1.40E-05 | NA       | 1.40E-05 | 6.42E-06 | 1.40E-05 | +x+x+x | rs138672395       |
| NA       | 6.43E-06 | 1.36E-05 | NA       | 1.36E-05 | 7.10E-06 | 1.36E-05 | +x+x+x | rs9601245         |
| NA       | 6.58E-06 | 1.35E-05 | NA       | 1.35E-05 | 7.25E-06 | 1.35E-05 | +x+x+x | rs9601246         |
| 3.92E-01 | 1.69E-06 | 1.07E-02 | 2.35E-01 | 1.07E-02 | 5.37E-04 | 1.07E-02 | +----+ | rs9514837         |

|          |                 |                 |                 |                 |                 |                 |        |                  |
|----------|-----------------|-----------------|-----------------|-----------------|-----------------|-----------------|--------|------------------|
| 5.51E-01 | <b>4.50E-06</b> | <b>2.53E-02</b> | 4.76E-01        | <b>2.53E-02</b> | <b>4.17E-03</b> | <b>2.53E-02</b> | +++x+  | rs9520847        |
| 2.51E-01 | <b>3.37E-06</b> | <b>1.43E-02</b> | 4.71E-01        | <b>1.43E-02</b> | <b>8.14E-03</b> | <b>1.43E-02</b> | +++++  | rs7143485        |
| 2.60E-01 | <b>3.28E-06</b> | <b>1.35E-02</b> | 4.75E-01        | <b>1.35E-02</b> | <b>7.93E-03</b> | <b>1.35E-02</b> | +++++  | rs7143702        |
| 7.48E-01 | NA              | <b>2.89E-02</b> | <b>1.26E-06</b> | <b>2.89E-02</b> | <b>1.50E-06</b> | <b>2.89E-02</b> | x+x+x+ | rs77669601       |
| 7.73E-01 | NA              | <b>2.89E-02</b> | <b>1.24E-06</b> | <b>2.89E-02</b> | <b>1.47E-06</b> | <b>2.89E-02</b> | x+x+x+ | chr14:73068127:D |
| 4.80E-01 | NA              | <b>1.75E-03</b> | <b>8.63E-06</b> | <b>1.75E-03</b> | <b>9.95E-06</b> | <b>1.75E-03</b> | x+x+x+ | rs144429502      |
| 1.19E-01 | <b>7.98E-06</b> | <b>4.84E-04</b> | 1.79E-01        | <b>4.84E-04</b> | <b>2.54E-05</b> | <b>4.84E-04</b> | ++++x- | rs999683         |
| 1.46E-01 | 6.95E-01        | <b>2.74E-03</b> | <b>7.05E-06</b> | <b>2.74E-03</b> | <b>4.27E-04</b> | <b>2.74E-03</b> | ----+  | rs674117         |
| 1.47E-01 | 6.93E-01        | <b>2.79E-03</b> | <b>6.41E-06</b> | <b>2.79E-03</b> | <b>4.02E-04</b> | <b>2.79E-03</b> | ----+  | rs674638         |
| 1.51E-01 | 7.02E-01        | <b>2.70E-03</b> | <b>6.29E-06</b> | <b>2.70E-03</b> | <b>4.11E-04</b> | <b>2.70E-03</b> | ----+  | rs674676         |
| 1.33E-01 | 7.34E-01        | <b>2.85E-03</b> | <b>4.30E-06</b> | <b>2.85E-03</b> | <b>3.81E-04</b> | <b>2.85E-03</b> | ----+  | rs663992         |
| 1.69E-01 | 7.12E-01        | <b>4.52E-03</b> | <b>9.05E-06</b> | <b>4.52E-03</b> | <b>4.61E-04</b> | <b>4.52E-03</b> | --++   | rs675599         |
| 1.31E-01 | 6.98E-01        | <b>2.66E-03</b> | <b>5.10E-06</b> | <b>2.66E-03</b> | <b>3.57E-04</b> | <b>2.66E-03</b> | ----+  | rs664768         |
| 2.01E-01 | 7.11E-01        | <b>3.46E-03</b> | <b>8.86E-06</b> | <b>3.46E-03</b> | <b>5.20E-04</b> | <b>3.46E-03</b> | ----+  | rs664824         |
| 1.55E-01 | 4.95E-01        | <b>2.22E-03</b> | <b>5.32E-06</b> | <b>2.22E-03</b> | <b>1.67E-04</b> | <b>2.22E-03</b> | ----+  | rs676476         |
| NA       | <b>3.36E-07</b> | <b>3.91E-03</b> | NA              | <b>3.91E-03</b> | <b>3.81E-07</b> | <b>3.91E-03</b> | xx+x+x | rs189167038      |
| NA       | <b>1.81E-06</b> | <b>1.28E-03</b> | NA              | <b>1.28E-03</b> | <b>2.02E-06</b> | <b>1.28E-03</b> | xx+x-x | rs142162415      |
| NA       | <b>2.51E-06</b> | <b>1.68E-03</b> | NA              | <b>1.68E-03</b> | <b>2.79E-06</b> | <b>1.68E-03</b> | xx+x+x | rs117047810      |
| 5.52E-01 | <b>4.60E-06</b> | 1.33E-01        | 3.55E-01        | 1.33E-01        | 6.14E-02        | 1.33E-01        | ++++-  | rs144014689      |
| NA       | <b>1.03E-06</b> | <b>2.79E-04</b> | NA              | <b>2.79E-04</b> | <b>1.16E-06</b> | <b>2.79E-04</b> | +x+xxx | rs138761776      |
| NA       | <b>3.74E-07</b> | <b>6.42E-05</b> | NA              | <b>6.42E-05</b> | <b>4.23E-07</b> | <b>6.42E-05</b> | +x+xxx | rs11466037       |
| NA       | <b>4.86E-06</b> | <b>7.06E-04</b> | NA              | <b>7.06E-04</b> | <b>5.37E-06</b> | <b>7.06E-04</b> | +x+xxx | rs11466035       |
| NA       | <b>6.58E-07</b> | <b>2.40E-04</b> | NA              | <b>2.40E-04</b> | <b>7.40E-07</b> | <b>2.40E-04</b> | +x+xxx | rs7185672        |
| NA       | <b>8.42E-08</b> | <b>8.25E-05</b> | NA              | <b>8.25E-05</b> | <b>9.65E-08</b> | <b>8.25E-05</b> | +x+xxx | rs183568578      |
| NA       | <b>1.68E-07</b> | <b>1.02E-04</b> | NA              | <b>1.02E-04</b> | <b>1.92E-07</b> | <b>1.02E-04</b> | +x+xxx | rs57491015       |
| NA       | <b>1.81E-07</b> | <b>1.11E-04</b> | NA              | <b>1.11E-04</b> | <b>2.06E-07</b> | <b>1.11E-04</b> | +x+xxx | rs145826624      |
| NA       | <b>1.80E-07</b> | <b>1.11E-04</b> | NA              | <b>1.11E-04</b> | <b>2.05E-07</b> | <b>1.11E-04</b> | +x+xxx | rs115453411      |
| NA       | <b>6.42E-07</b> | <b>2.43E-04</b> | NA              | <b>2.43E-04</b> | <b>7.23E-07</b> | <b>2.43E-04</b> | +x+xxx | rs77086855       |
| NA       | <b>2.28E-06</b> | <b>4.90E-07</b> | NA              | <b>4.90E-07</b> | <b>2.54E-06</b> | <b>4.90E-07</b> | +x+x+x | rs16953145       |
| NA       | <b>4.05E-06</b> | <b>1.06E-06</b> | NA              | <b>1.06E-06</b> | <b>4.48E-06</b> | <b>1.06E-06</b> | +x+x+x | rs16953148       |
| NA       | <b>6.01E-06</b> | <b>2.39E-06</b> | NA              | <b>2.39E-06</b> | <b>6.63E-06</b> | <b>2.39E-06</b> | +x+x+x | rs61326721       |
| NA       | <b>3.72E-06</b> | <b>1.38E-05</b> | NA              | <b>1.38E-05</b> | <b>4.12E-06</b> | <b>1.38E-05</b> | +x+xxx | rs984432         |
| NA       | <b>3.69E-06</b> | <b>1.38E-05</b> | NA              | <b>1.38E-05</b> | <b>4.09E-06</b> | <b>1.38E-05</b> | +x+xxx | rs60090586       |
| NA       | <b>4.51E-06</b> | <b>1.05E-05</b> | NA              | <b>1.05E-05</b> | <b>4.98E-06</b> | <b>1.05E-05</b> | +x+xxx | rs41515846       |
| NA       | <b>9.64E-06</b> | <b>3.78E-06</b> | NA              | <b>3.78E-06</b> | <b>1.06E-05</b> | <b>3.78E-06</b> | +xxx+x | rs116654103      |
| NA       | <b>9.31E-06</b> | <b>3.50E-06</b> | NA              | <b>3.50E-06</b> | <b>1.02E-05</b> | <b>3.50E-06</b> | +xxx+x | rs150538526      |
| 2.39E-01 | 2.77E-01        | 6.56E-02        | <b>8.46E-06</b> | 6.56E-02        | <b>1.16E-02</b> | 6.56E-02        | -++++  | rs8109054        |
| 2.61E-01 | 3.11E-01        | 6.03E-02        | <b>8.10E-06</b> | 6.03E-02        | <b>9.69E-03</b> | 6.03E-02        | -++++  | rs8108904        |
| 2.25E-01 | 3.43E-01        | 5.21E-02        | <b>5.99E-06</b> | 5.21E-02        | <b>7.27E-03</b> | 5.21E-02        | -++++  | rs35747850       |
| 1.88E-01 | 3.26E-01        | 1.30E-01        | <b>4.22E-06</b> | 1.30E-01        | <b>1.53E-02</b> | 1.30E-01        | +++++  | chr19:49083629:D |
| 2.57E-01 | 3.22E-01        | 9.42E-02        | <b>2.11E-06</b> | 9.42E-02        | <b>4.52E-03</b> | 9.42E-02        | -++++  | rs11878647       |
| 2.58E-01 | 2.97E-01        | 9.48E-02        | <b>1.57E-06</b> | 9.48E-02        | <b>4.72E-03</b> | 9.48E-02        | -++++  | rs11878722       |
| 2.59E-01 | 5.96E-01        | <b>2.44E-02</b> | <b>1.77E-06</b> | <b>2.44E-02</b> | <b>5.48E-04</b> | <b>2.44E-02</b> | +++++  | rs61416619       |
| 3.24E-01 | 9.34E-01        | <b>7.68E-03</b> | <b>6.39E-06</b> | <b>7.68E-03</b> | <b>3.77E-05</b> | <b>7.68E-03</b> | +++x+  | chr19:49087071:D |
| 2.31E-01 | <b>1.92E-02</b> | 2.99E-01        | <b>2.02E-06</b> | 2.99E-01        | <b>3.36E-02</b> | 2.99E-01        | -++++  | rs73053552       |
| 1.84E-01 | <b>3.43E-02</b> | 2.88E-01        | <b>1.14E-06</b> | 2.88E-01        | <b>1.47E-02</b> | 2.88E-01        | -++x+  | rs73053558       |

|                 |                 |                 |                 |                 |                 |                 |        |                  |
|-----------------|-----------------|-----------------|-----------------|-----------------|-----------------|-----------------|--------|------------------|
| 2.43E-01        | 9.12E-01        | <b>4.58E-04</b> | <b>9.11E-06</b> | <b>4.58E-04</b> | <b>1.27E-03</b> | <b>4.58E-04</b> | +++    | chr19:50860233:D |
| 1.45E-01        | 6.41E-01        | <b>1.18E-05</b> | <b>5.38E-06</b> | <b>1.18E-05</b> | <b>2.58E-05</b> | <b>1.18E-05</b> | +++    | rs2695121        |
| 1.57E-01        | 4.88E-01        | <b>7.65E-05</b> | <b>5.73E-06</b> | <b>7.65E-05</b> | <b>4.76E-05</b> | <b>7.65E-05</b> | +++    | rs2248949        |
| NA              | <b>9.77E-06</b> | <b>3.64E-04</b> | NA              | <b>3.64E-04</b> | <b>1.07E-05</b> | <b>3.64E-04</b> | +x+x+x | rs6037613        |
| NA              | <b>9.95E-06</b> | <b>3.72E-04</b> | NA              | <b>3.72E-04</b> | <b>1.09E-05</b> | <b>3.72E-04</b> | +x+x+x | rs6115932        |
| NA              | <b>9.95E-06</b> | <b>3.73E-04</b> | NA              | <b>3.73E-04</b> | <b>1.09E-05</b> | <b>3.73E-04</b> | +x+x+x | rs7343859        |
| NA              | <b>9.95E-06</b> | <b>3.73E-04</b> | NA              | <b>3.73E-04</b> | <b>1.09E-05</b> | <b>3.73E-04</b> | +x+x+x | rs6051913        |
| NA              | <b>8.24E-06</b> | <b>3.14E-04</b> | NA              | <b>3.14E-04</b> | <b>9.06E-06</b> | <b>3.14E-04</b> | +x+x+x | rs6051919        |
| NA              | <b>6.49E-06</b> | <b>2.87E-04</b> | NA              | <b>2.87E-04</b> | <b>7.15E-06</b> | <b>2.87E-04</b> | +x+x+x | rs6107305        |
| 1.64E-01        | 4.93E-01        | <b>1.34E-05</b> | <b>2.16E-06</b> | <b>1.34E-05</b> | <b>6.86E-05</b> | <b>1.34E-05</b> | -+xx   | rs6131652        |
| <b>2.59E-02</b> | <b>1.55E-02</b> | <b>2.21E-06</b> | <b>7.52E-05</b> | <b>2.21E-06</b> | <b>4.97E-06</b> | <b>2.21E-06</b> | +++    | rs28650065       |
| NA              | <b>3.30E-06</b> | <b>1.85E-05</b> | NA              | <b>1.85E-05</b> | <b>3.66E-06</b> | <b>1.85E-05</b> | +x+xxx | chr20:21706604:I |
| NA              | <b>6.61E-06</b> | <b>7.45E-07</b> | NA              | <b>7.45E-07</b> | <b>7.29E-06</b> | <b>7.45E-07</b> | +x+xxx | rs114269992      |
| NA              | <b>7.06E-06</b> | <b>7.94E-07</b> | NA              | <b>7.94E-07</b> | <b>7.78E-06</b> | <b>7.94E-07</b> | +x+xxx | rs114620529      |
| NA              | <b>7.48E-06</b> | <b>7.30E-07</b> | NA              | <b>7.30E-07</b> | <b>8.24E-06</b> | <b>7.30E-07</b> | +x+xxx | rs116629084      |
| NA              | <b>3.28E-06</b> | <b>2.63E-07</b> | NA              | <b>2.63E-07</b> | <b>3.63E-06</b> | <b>2.63E-07</b> | +x+xxx | rs115384512      |
| NA              | <b>3.25E-06</b> | <b>2.59E-07</b> | NA              | <b>2.59E-07</b> | <b>3.60E-06</b> | <b>2.59E-07</b> | +x+xxx | rs147641662      |
| NA              | <b>3.21E-06</b> | <b>2.55E-07</b> | NA              | <b>2.55E-07</b> | <b>3.56E-06</b> | <b>2.55E-07</b> | +x+xxx | rs191783144      |
| NA              | <b>3.20E-06</b> | <b>2.54E-07</b> | NA              | <b>2.54E-07</b> | <b>3.55E-06</b> | <b>2.54E-07</b> | +x+xxx | rs146806338      |
| NA              | <b>3.40E-06</b> | <b>2.60E-07</b> | NA              | <b>2.60E-07</b> | <b>3.77E-06</b> | <b>2.60E-07</b> | +x+xxx | rs114828727      |
| NA              | <b>3.58E-06</b> | <b>2.54E-07</b> | NA              | <b>2.54E-07</b> | <b>3.97E-06</b> | <b>2.54E-07</b> | +x+xxx | rs114128002      |
| NA              | <b>8.73E-06</b> | <b>6.29E-07</b> | NA              | <b>6.29E-07</b> | <b>9.60E-06</b> | <b>6.29E-07</b> | +x+xxx | rs115342711      |
| NA              | <b>8.73E-06</b> | <b>6.29E-07</b> | NA              | <b>6.29E-07</b> | <b>9.60E-06</b> | <b>6.29E-07</b> | +x+xxx | chr20:24955422:I |
| NA              | <b>8.50E-06</b> | <b>5.53E-07</b> | NA              | <b>5.53E-07</b> | <b>9.35E-06</b> | <b>5.53E-07</b> | +x+xxx | rs115764440      |
| NA              | <b>9.01E-06</b> | <b>5.08E-07</b> | NA              | <b>5.08E-07</b> | <b>9.90E-06</b> | <b>5.08E-07</b> | +x+xxx | rs116068335      |
| NA              | <b>6.41E-06</b> | <b>4.06E-07</b> | NA              | <b>4.06E-07</b> | <b>7.07E-06</b> | <b>4.06E-07</b> | +x+xxx | rs114637142      |
| NA              | <b>8.80E-06</b> | <b>6.08E-07</b> | NA              | <b>6.08E-07</b> | <b>9.68E-06</b> | <b>6.08E-07</b> | +x+xxx | rs114071901      |
| NA              | <b>9.22E-06</b> | <b>6.64E-07</b> | NA              | <b>6.64E-07</b> | <b>1.01E-05</b> | <b>6.64E-07</b> | +x+xxx | rs113232742      |
| NA              | <b>9.33E-06</b> | <b>6.79E-07</b> | NA              | <b>6.79E-07</b> | <b>1.03E-05</b> | <b>6.79E-07</b> | +x+xxx | rs114199928      |
| NA              | <b>9.73E-06</b> | <b>7.20E-07</b> | NA              | <b>7.20E-07</b> | <b>1.07E-05</b> | <b>7.20E-07</b> | +x+xxx | rs114836364      |
| NA              | <b>4.03E-06</b> | <b>5.48E-07</b> | NA              | <b>5.48E-07</b> | <b>4.47E-06</b> | <b>5.48E-07</b> | +x+xxx | rs116669368      |
| NA              | <b>3.86E-06</b> | <b>1.12E-06</b> | NA              | <b>1.12E-06</b> | <b>4.27E-06</b> | <b>1.12E-06</b> | +x+xxx | rs145379934      |
| 2.87E-01        | <b>7.25E-06</b> | 1.09E-01        | 4.61E-01        | 1.09E-01        | 1.48E-01        | 1.09E-01        | +++    | rs6022230        |
| 2.26E-01        | <b>3.27E-06</b> | 1.10E-01        | 4.11E-01        | 1.10E-01        | 1.61E-01        | 1.10E-01        | +++    | rs6013609        |
| 2.34E-01        | <b>2.41E-06</b> | 1.08E-01        | 4.07E-01        | 1.08E-01        | 1.57E-01        | 1.08E-01        | +++    | rs6022233        |
| 2.28E-01        | <b>1.43E-06</b> | 9.72E-02        | 3.97E-01        | 9.72E-02        | 1.49E-01        | 9.72E-02        | +++    | rs964886         |
| 2.07E-01        | <b>5.44E-06</b> | 1.24E-01        | 3.98E-01        | 1.24E-01        | 1.89E-01        | 1.24E-01        | +++    | rs6022236        |
| 1.84E-01        | <b>2.39E-06</b> | 6.95E-02        | 4.26E-01        | 6.95E-02        | 7.14E-02        | 6.95E-02        | +++    | rs6022237        |
| 4.36E-01        | <b>6.99E-06</b> | <b>2.13E-02</b> | 1.32E-01        | <b>2.13E-02</b> | 5.78E-02        | <b>2.13E-02</b> | +++    | rs6014553        |
| 6.97E-01        | <b>8.16E-06</b> | <b>1.87E-02</b> | 1.29E-01        | <b>1.87E-02</b> | 7.31E-02        | <b>1.87E-02</b> | +++    | rs6014555        |
| 9.01E-01        | <b>7.98E-06</b> | <b>5.30E-03</b> | 9.64E-01        | <b>5.30E-03</b> | <b>5.77E-04</b> | <b>5.30E-03</b> | ++++   | rs2427339        |
| NA              | <b>9.08E-06</b> | <b>1.20E-05</b> | NA              | <b>1.20E-05</b> | <b>9.98E-06</b> | <b>1.20E-05</b> | +x+xxx | rs78068107       |
| NA              | <b>5.36E-06</b> | <b>6.49E-06</b> | NA              | <b>6.49E-06</b> | <b>5.92E-06</b> | <b>6.49E-06</b> | +x+xxx | rs78108129       |
| 4.52E-01        | <b>8.86E-06</b> | 3.80E-01        | 1.01E-01        | 3.80E-01        | 1.65E-01        | 3.80E-01        | -++    | rs2833695        |
| 6.39E-01        | <b>6.48E-07</b> | 1.88E-01        | 1.12E-01        | 1.88E-01        | 1.49E-01        | 1.88E-01        | -++    | rs2833696        |
| 6.46E-01        | <b>8.03E-06</b> | 7.53E-01        | <b>2.09E-02</b> | 7.53E-01        | 3.82E-01        | 7.53E-01        | -++    | rs2833702        |

|                 |                 |                 |                 |                 |                 |                 |        |                  |
|-----------------|-----------------|-----------------|-----------------|-----------------|-----------------|-----------------|--------|------------------|
| 4.98E-01        | <b>9.00E-06</b> | 8.42E-01        | <b>1.20E-02</b> | 8.42E-01        | 5.14E-01        | 8.42E-01        | -++++  | rs2833703        |
| 5.00E-01        | <b>8.56E-06</b> | 8.44E-01        | <b>1.19E-02</b> | 8.44E-01        | 5.11E-01        | 8.44E-01        | -++++  | rs11088207       |
| 5.02E-01        | <b>8.01E-06</b> | 8.48E-01        | <b>1.19E-02</b> | 8.48E-01        | 5.08E-01        | 8.48E-01        | -++++  | rs2833704        |
| 5.03E-01        | <b>7.71E-06</b> | 8.51E-01        | <b>1.18E-02</b> | 8.51E-01        | 5.06E-01        | 8.51E-01        | -++++  | rs11088208       |
| 5.04E-01        | <b>6.93E-06</b> | 8.46E-01        | <b>1.17E-02</b> | 8.46E-01        | 4.99E-01        | 8.46E-01        | -++++  | rs12483370       |
| 4.99E-01        | <b>9.24E-06</b> | 8.59E-01        | <b>1.45E-02</b> | 8.59E-01        | 4.98E-01        | 8.59E-01        | -++++  | rs2833705        |
| 5.53E-01        | <b>4.32E-06</b> | 8.21E-01        | <b>1.25E-02</b> | 8.21E-01        | 4.57E-01        | 8.21E-01        | -++++  | rs12483543       |
| 5.46E-01        | <b>5.41E-06</b> | 8.16E-01        | <b>1.25E-02</b> | 8.16E-01        | 4.74E-01        | 8.16E-01        | -++++  | rs11088209       |
| 5.46E-01        | <b>5.39E-06</b> | 8.17E-01        | <b>1.25E-02</b> | 8.17E-01        | 4.74E-01        | 8.17E-01        | -++++  | rs11088210       |
| 5.46E-01        | <b>5.35E-06</b> | 8.17E-01        | <b>1.25E-02</b> | 8.17E-01        | 4.73E-01        | 8.17E-01        | -++++  | rs11088211       |
| 5.50E-01        | <b>4.95E-06</b> | 8.18E-01        | <b>1.25E-02</b> | 8.18E-01        | 4.67E-01        | 8.18E-01        | -++++  | rs2833707        |
| 5.52E-01        | <b>4.76E-06</b> | 8.19E-01        | <b>1.25E-02</b> | 8.19E-01        | 4.64E-01        | 8.19E-01        | -++++  | rs2833708        |
| 5.52E-01        | <b>4.68E-06</b> | 8.19E-01        | <b>1.25E-02</b> | 8.19E-01        | 4.63E-01        | 8.19E-01        | -++++  | rs2833709        |
| 5.52E-01        | <b>4.65E-06</b> | 8.19E-01        | <b>1.24E-02</b> | 8.19E-01        | 4.62E-01        | 8.19E-01        | -++++  | rs12482617       |
| 5.52E-01        | <b>4.66E-06</b> | 8.19E-01        | <b>1.24E-02</b> | 8.19E-01        | 4.62E-01        | 8.19E-01        | -++++  | rs12482514       |
| 5.52E-01        | <b>4.65E-06</b> | 8.20E-01        | <b>1.24E-02</b> | 8.20E-01        | 4.62E-01        | 8.20E-01        | -++++  | rs2833713        |
| 5.52E-01        | <b>4.64E-06</b> | 8.20E-01        | <b>1.24E-02</b> | 8.20E-01        | 4.62E-01        | 8.20E-01        | -++++  | rs77148260       |
| 5.52E-01        | <b>4.64E-06</b> | 8.20E-01        | <b>1.24E-02</b> | 8.20E-01        | 4.62E-01        | 8.20E-01        | -++++  | rs113442259      |
| 5.52E-01        | <b>4.64E-06</b> | 8.20E-01        | <b>1.24E-02</b> | 8.20E-01        | 4.62E-01        | 8.20E-01        | -++++  | rs113213508      |
| 5.19E-01        | <b>3.79E-06</b> | 7.93E-01        | <b>5.28E-03</b> | 7.93E-01        | 4.50E-01        | 7.93E-01        | -+++x  | rs112075059      |
| 5.52E-01        | <b>4.64E-06</b> | 8.20E-01        | <b>1.24E-02</b> | 8.20E-01        | 4.62E-01        | 8.20E-01        | -++++  | rs12483027       |
| 5.52E-01        | <b>4.63E-06</b> | 8.20E-01        | <b>1.24E-02</b> | 8.20E-01        | 4.62E-01        | 8.20E-01        | -++++  | rs12483069       |
| 5.52E-01        | <b>4.62E-06</b> | 8.20E-01        | <b>1.24E-02</b> | 8.20E-01        | 4.62E-01        | 8.20E-01        | -++++  | rs2833714        |
| 5.53E-01        | <b>4.59E-06</b> | 8.20E-01        | <b>1.24E-02</b> | 8.20E-01        | 4.61E-01        | 8.20E-01        | -++++  | rs78098177       |
| 5.53E-01        | <b>4.47E-06</b> | 8.06E-01        | <b>1.33E-02</b> | 8.06E-01        | 4.46E-01        | 8.06E-01        | -++++  | rs2833718        |
| 5.53E-01        | <b>4.48E-06</b> | 8.21E-01        | <b>1.24E-02</b> | 8.21E-01        | 4.60E-01        | 8.21E-01        | -++++  | rs8128985        |
| 5.55E-01        | <b>4.55E-06</b> | 8.20E-01        | <b>1.21E-02</b> | 8.20E-01        | 4.65E-01        | 8.20E-01        | -++++  | rs78794822       |
| 4.85E-01        | <b>9.91E-06</b> | 9.88E-01        | <b>1.12E-02</b> | 9.88E-01        | 5.56E-01        | 9.88E-01        | -++++  | rs112412785      |
| 5.45E-01        | <b>2.39E-06</b> | 7.49E-01        | <b>5.17E-03</b> | 7.49E-01        | 3.78E-01        | 7.49E-01        | -+++x  | rs113561184      |
| 5.53E-01        | <b>3.42E-06</b> | 6.96E-01        | <b>7.20E-03</b> | 6.96E-01        | 3.60E-01        | 6.96E-01        | -+++x  | rs117578633      |
| 5.85E-01        | <b>7.95E-06</b> | 9.62E-01        | <b>6.44E-03</b> | 9.62E-01        | 6.41E-01        | 9.62E-01        | -++++  | rs111282827      |
| 4.86E-01        | <b>9.96E-06</b> | 9.87E-01        | <b>1.12E-02</b> | 9.87E-01        | 5.57E-01        | 9.87E-01        | -++++  | rs79779898       |
| 6.14E-01        | <b>9.47E-06</b> | 6.21E-01        | <b>1.72E-02</b> | 6.21E-01        | 3.15E-01        | 6.21E-01        | -+++x  | chr21:33569654:D |
| 5.06E-01        | <b>9.62E-06</b> | 7.43E-01        | <b>3.52E-02</b> | 7.43E-01        | 2.69E-01        | 7.43E-01        | -++++  | rs2249432        |
| 4.99E-01        | <b>9.81E-06</b> | 7.33E-01        | <b>3.60E-02</b> | 7.33E-01        | 2.66E-01        | 7.33E-01        | -++++  | rs8131083        |
| <b>3.19E-02</b> | <b>4.04E-03</b> | <b>6.64E-05</b> | <b>3.66E-04</b> | <b>6.64E-05</b> | <b>9.52E-06</b> | <b>6.64E-05</b> | -----  | rs16989309       |
| NA              | <b>8.72E-07</b> | <b>3.90E-05</b> | NA              | <b>3.90E-05</b> | <b>9.79E-07</b> | <b>3.90E-05</b> | +x+x-x | rs111414152      |
| NA              | <b>7.35E-08</b> | <b>1.86E-05</b> | NA              | <b>1.86E-05</b> | <b>8.44E-08</b> | <b>1.86E-05</b> | +x+xxx | rs116214529      |
| NA              | <b>7.27E-08</b> | <b>1.84E-05</b> | NA              | <b>1.84E-05</b> | <b>8.34E-08</b> | <b>1.84E-05</b> | +x+xxx | rs186825689      |
| NA              | <b>1.00E-06</b> | <b>1.90E-04</b> | NA              | <b>1.90E-04</b> | <b>1.12E-06</b> | <b>1.90E-04</b> | +x+xxx | rs115728891      |
| NA              | <b>1.36E-06</b> | <b>2.40E-04</b> | NA              | <b>2.40E-04</b> | <b>1.52E-06</b> | <b>2.40E-04</b> | +x+xxx | rs115266927      |
| NA              | <b>1.43E-06</b> | <b>2.49E-04</b> | NA              | <b>2.49E-04</b> | <b>1.60E-06</b> | <b>2.49E-04</b> | +x+xxx | rs79229123       |
| NA              | <b>1.35E-06</b> | <b>2.49E-04</b> | NA              | <b>2.49E-04</b> | <b>1.51E-06</b> | <b>2.49E-04</b> | +x+xxx | rs185614941      |
| 7.45E-01        | NA              | <b>1.22E-04</b> | <b>6.80E-08</b> | <b>1.22E-04</b> | <b>8.36E-08</b> | <b>1.22E-04</b> | x+x+x- | chr22:26917069:I |
| 2.09E-01        | 8.48E-02        | <b>6.99E-05</b> | <b>9.23E-08</b> | <b>6.99E-05</b> | <b>1.03E-06</b> | <b>6.99E-05</b> | +++++  | rs4149485        |

**eTable 2.** Pleiotropy tests between cannabis dependence and five psychiatric disorders in AAs and EAs

| Disorder          | CAD EA              |                | CAD AA              |         |
|-------------------|---------------------|----------------|---------------------|---------|
|                   | Associated SNPs (%) | p-value        | Associated SNPs (%) | p-value |
| MDD <sup>a</sup>  | 1.7                 | <b>2.39E-5</b> | 0.4                 | 0.75    |
| SCZ <sup>b</sup>  | 0.2                 | 0.37           | 0.4                 | 0.76    |
| BPD <sup>c</sup>  | 0.5                 | 0.72           | 0.01                | 0.99    |
| ASD <sup>d</sup>  | 2.7E-4              | 0.99           | 0.3                 | 0.72    |
| ADHD <sup>e</sup> | 0                   | NA             | 0                   | NA      |

<sup>a</sup>major depressive disorder

<sup>b</sup>schizophrenia

<sup>c</sup>bipolar affective disorder

<sup>d</sup>autism spectrum disorder

<sup>e</sup>attention deficit hyperactivity disorder
